# Supplementary material
Source: publisher figshare collection journal article supplement (https://gsajournals.figshare.com/ndownloader/files/13164572)
Supplement: Supplementary file 1 [file 13164572]

## Sheet: Information
Dataset 3
Clustering analysis of 776 genes with significant differential expression (FDR < 0.01) based on EdgeR analysis.
Differential expression for each alcohol (0.8% Butanol, 1% Isobutanol, and 4% Ethanol) was compared to YPD under aerobic conditions, across strains.
Columns:
Gene ID
Gene Name
Transcriptional comparation information:	Alcohol (But = 0.8% Butanol, Iso = 1% Isobutanol, Eth = 4% Ethanol)
	YPD
	AE = Aerobic
	Strain (WA = West African, PAP = Papaya, IL = IL01)
Rep	Replicate 1 or 2

## Sheet: Dataset3
UID	NAME	But.YPD_AE_WA_R1	But.YPD_AE_WA_R2	But.YPD_AE_PAP_R1	But.YPD_AE_PAP_R2	But.YPD_AE_IL_R1	But.YPD_AE_IL_R2	0	Iso.YPD_AE_WA_R1	Iso.YPD_AE_WA_R2	Iso.YPD_AE_PAP_R1	Iso.YPD_AE_PAP_R2	Iso.YPD_AE_IL_R1	Iso.YPD_AE_IL_R2	0	Eth.YPD_AE_WA_R1	Eth.YPD_AE_WA_R2	Eth.YPD_AE_PAP_R1	Eth.YPD_AE_PAP_R2	Eth.YPD_AE_IL_R1	Eth.YPD_AE_IL_R2
Cluster_1	#N/A	0	0	0	0	0	0	0	0	0	0	0	0	0	0	0	0	0	0	0	0
YLL062C	YLL062C ... MHT1 sulfur amino acid metabolism homocysteine S-methyltransferase accytoplasm | YLL063C	-0.00898137	-0.475137	-0.639796	-0.415558	1.66094	1.17721	0	0.363552	0.189335	0.410048	1.05285	1.41567	1.48958	0	0.53874	0.204383	0.00871497	0.297883	3.12594	2.83104
YDR058C	YDR058C ... TGL2 lipid metabolism triacylglycerol lipase activity cellular component unknown | YDR059C	0.57211	0.521021	1.89647	2.31247	0.982389	1.62824	0	0.733364	1.1291	1.18483	1.93213	1.5405	1.50288	0	0.02995	0.562121	1.97085	2.20592	1.94257	1.69721
YNL014W	YNL014W ... HEF3 translational elongation ATPase activity* cytosolic ribosome (sensu Eukaryota | YNL015W	-0.109332	1.25799	-0.358341	0.76132	1.13439	1.24109	0	0.535006	1.06564	-0.221989	0.873034	1.88515	1.20418	0	0.033635	1.26328	0.453005	0.381651	2.87219	1.80761
YJL102W	YJL102W ... MEF2 translational elongation translation elongation factor activmitochondrion | YJL103C	-0.07894	0.398164	0.31039	0.447942	0.696832	0.145424	0	-0.38921	0.187893	0.169332	0.208304	0.355601	-0.0102986	0	-0.0732296	0.84262	0.593062	0.853618	1.51095	1.02438
YOL053W	YOL053W … AIM39 biological process unknown molecular function unknown | Putative protein of unknown function; null mutant displays elevated frequency of mitochondrial genome lossYOL054W	0.0702757	0.743413	1.05864	1.39736	1.93948	1.04941	0	0.129651	1.2047	1.18682	1.08007	1.82857	0.993429	0	-0.533001	0.732046	1.012	1.2404	2.3782	1.17713
YNL124W	YNL124W PAC cluster NAF1 transport* RNA binding* nucleoplasm | YNL125C	0.335697	1.1794	0.675277	0.592518	1.41217	1.02816	0	-0.225641	0.27126	0.296568	0.136396	0.88515	0.320724	0	-0.107561	0.547469	-0.0254827	-0.00419734	1.65169	0.432232
YDR248C	YDR248C ... YDR248C biological process unknown molecular function unknown cytoplasm | YDR249C	0.499119	1.10598	1.68605	1.83682	1.27878	1.55804	0	1.14346	1.83655	2.26986	2.36097	1.88515	1.6855	0	-0.347646	0.32217	1.01288	1.7493	2.25025	1.44153
YIL074C	YIL074C ... SER33 serine family amino acid biosy phosphoglycerate dehydrogenase acticytoplasm | YIL075C	-0.105144	-0.12021	-0.322986	0.268689	0.148858	0.195177	0	-0.227129	0.0167663	0.256341	0.650568	1.27604	1.33308	0	-0.129731	-0.274326	0.0489385	0.378475	1.51447	1.53304
YIR030C	YIR030C ... DCG1 nitrogen compound metabolism molecular function unknown cellular component unknown | YIR030W-A	-0.170732	0.466573	1.84894	1.4579	1.78647	1.03163	0	0.360711	1.28475	2.31161	1.48908	3.47011	2.67991	0	-1.00468	-0.144148	1.60749	1.09786	3.17175	1.9279
YPL124W	YPL124W ... SPC29 microtubule nucleation* structural constituent of cytoskelecentral plaque of spindle pole body | YPL125W	-0.333004	0.283982	0.391528	0.24876	0.719355	-0.530961	0	-0.621552	0.179672	-0.299157	0.039044	0.300188	0.394946	0	-0.868109	-0.22215	0.479194	0.488128	2.3812	1.13133
YPL024W	YPL024W ... RMI1 response to DNA damage stimulu molecular function unknown cytoplasm* | YPL025C	0.18881	0.745955	0.564491	1.09429	0.73076	0.950074	0	0.578575	0.825323	0.415441	0.360972	0.52258	1.11822	0	0.674767	0.704786	0.850839	1.50528	1.6636	1.35669
YNL277W	YNL277W ... MET2 methionine biosynthesis* homoserine O-acetyltransferase acticytoplasm | YNL277W-A	-0.773397	0.105983	-1.11145	-0.329828	-0.322465	0.0731102	0	-0.220982	0.869717	1.09598	1.70974	1.65069	1.56758	0	1.14216	1.8076	1.07364	1.85122	3.03469	3.75708
YLR067C	YLR067C ... PET309 protein biosynthesis* translation regulator activity integral to membrane* | YLR068W	-0.116839	-0.179908	0.534565	0.790199	0.691779	0.922595	0	-0.355546	-0.226168	0.356257	0.58305	0.515736	0.687028	0	-0.384109	-0.17598	0.799328	1.11634	1.47178	1.05245
YKR080W	YKR080W ... MTD1 one-carbon compound metabolism methylenetetrahydrofolate dehydrogecytosol | YKR081C	0.568953	1.15951	-0.353628	0.0703755	0.925939	0.505542	0	0.383115	1.01004	1.01543	0.821687	2.31239	1.33925	0	0.283233	0.728684	0.758641	0.821445	2.35098	1.38024
YBR176W	YBR176W ... ECM31 pantothenate biosynthesis 3-methyl-2-oxobutanoate hydroxymethmitochondrion | YBR177C	0.42339	0.693984	0.756681	1.21356	1.05536	1.1435	0	0.335489	0.64519	0.598446	0.621704	0.938002	1.15558	0	0.0699311	0.148218	0.580166	0.725592	1.222	0.843132
YJL012C	YJL012C ... VTC4 vacuole fusion, non-autophagic molecular function unknown intrinsic to vacuolar membrane | YJL013C	-0.47841	-0.568599	-0.218343	0.386253	-0.202459	-0.0628916	0	-0.0492046	0.107507	0.240301	0.634664	0.489901	0.656006	0	0.312108	-0.0229698	0.281193	0.83168	1.2223	0.996515
YKL155C	YKL155C ... RSM22 protein biosynthesis structural constituent of ribosome mitochondrial small ribosomal subun | YKL156W	-0.524785	0.44467	0.586517	0.626329	1.03032	0.688589	0	-0.203968	0.699116	0.617075	0.369602	0.538348	0.497556	0	-0.183511	0.959297	0.935111	1.05664	2.10551	1.30299
YER061C	YER061C ... CEM1 hexadecanal biosynthesis 3-oxoacyl-[acyl-carrier protein] symitochondrion | YER062C	0.797835	1.0722	0.40702	0.762839	1.07836	0.807841	0	0.838017	1.17847	1.1677	1.28005	2.09374	1.62451	0	0.413461	0.523804	0.499547	0.881283	1.81944	1.31206
YDR363W-A	YDR363W-A ... SEM1 ubiquitin-dependent protein ca molecular function unknown nucleus* | YDR364C	0.449854	1.2323	0.706172	0.513403	0.947047	0.592216	0	0.354617	1.43917	1.01789	0.848159	1.09396	1.01041	0	-0.776046	0.198182	0.659537	0.775416	2.05479	1.10117
YKL195W	YKL195W ... MIA40 mitochondrial intermembrane sp molecular function unknown mitochondrion* | YKL196C	0.0133506	2.19401	0.474549	0.617138	1.22394	0.968761	0	0.00739952	1.98215	1.09624	0.766237	1.10398	0.825112	0	-0.782987	1.74711	0.897399	1.21112	2.50235	1.71525
YDR475C	YDR475C ... JIP4 biological process unknown molecular function unknown cellular component unknown | YDR476C	-0.00492354	0.794039	0.389457	0.818041	0.610831	0.605068	0	0.142399	0.843245	0.770922	0.869119	1.03401	0.667291	0	0.178685	0.987303	0.514588	0.823084	1.71427	1.07861
YML121W	YML121W ... GTR1 phosphate transport GTPase activity cytoplasm* | YML122C	0.739806	0.737979	0.633438	1.1296	1.00113	1.03056	0	0.292221	0.454679	0.408868	0.474183	0.712571	0.938408	0	0.0863062	-0.166297	0.257644	0.449702	1.34638	0.7146
YLL060C	YLL060C ... GTT2 glutathione metabolism glutathione transferase activity mitochondrion | YLL061W	1.78704	1.89542	1.76333	1.84482	3.23393	1.7677	0	0.680056	1.11072	0.79687	0.97193	2.05508	1.33758	0	0.689647	0.817378	1.02482	0.931208	2.72633	1.75002
YOR161W-B	YOR161W-B … Dubious Identified by gene-trapping, microarray-based expression analysis, and genome-wide homology searchingYOR186C-A	0.966771	1.93606	0.449014	1.07543	1.912	2.53943	0	1.15168	2.16517	0.737369	1.32855	1.75962	2.40712	0	0.0426238	1.77785	0.624771	1.22072	1.87219	2.79184
YGR250C	YGR250C iESR cluster YGR250C biological process unknown RNA binding cytoplasm | YGR251W	0.928803	0.878343	1.05929	1.54894	1.23393	1.28533	0	0.625608	0.973874	0.880664	0.668296	0.88515	0.880904	0	0.02995	0.343829	0.265194	0.387176	1.42764	1.10478
YLR364W	YLR364W … GRX8 biological process unknown molecular function unknown | Glutaredoxin that employs a dithiol mechanism of catalysis; monomeric; activity is low and null mutation does not affect sensitivity to oxidative stress; GFP-fusion protein localizes to the cytoplasm; expression strongly induced by arsenicYLR365W	0.33331	0.511919	0.0105172	0.334815	0.83183	0.673657	0	0.84875	1.07468	-0.0469022	0.802005	0.942484	1.24927	0	0.915389	0.278748	0.492577	0.786819	1.42377	1.22638
YNR029C	YNR029C ... YNR029C biological process unknown molecular function unknown cytoplasm | YNR030W	-0.0546354	1.14446	1.13019	1.48781	1.34551	1.55862	0	-0.38572	0.58021	0.48583	0.459376	0.607166	0.656164	0	-0.631998	0.0919583	-0.0226428	0.325897	1.42826	0.775651
YBR050C	YBR050C ... REG2 negative regulation of transcr protein phosphatase type 1 activityprotein phosphatase type 1 complex | YBR051W	0.481344	0.521021	1.03398	-0.924571	1.49696	1.95447	0	0.988178	1.90214	1.32233	0.77601	2.05508	2.40712	0	1.07177	2.02578	2.98734	2.22072	3.45715	3.64745
YGL180W	YGL180W iESR cluster ATG1 autophagy protein serine/threonine kinase actcytosol | YGL181W	1.06992	1.44098	0.158067	1.02064	0.765779	0.91445	0	0.315121	1.0819	0.576701	0.74155	0.521338	0.899495	0	0.175466	0.818492	0.461618	1.09786	1.23965	1.5523
YOL023W	YOL023W ... IFM1 translational initiation RNA binding* mitochondrion | YOL024W	-0.640875	-0.286334	0.131075	1.17012	0.772275	0.738528	0	-0.322412	0.323052	0.768085	0.710758	0.563222	0.627282	0	-0.48613	0.271664	0.973579	1.57359	1.85328	1.12317
YGR021W	YGR021W ... YGR021W biological process unknown molecular function unknown mitochondrion | YGR022C	-0.14607	0.334608	0.415405	0.466013	0.674961	0.927089	0	-0.354628	0.535816	0.942301	0.304098	0.364318	-0.255845	0	-0.110959	0.990843	1.14029	1.16959	1.96024	1.66137
YFL004W	YFL004W ... VTC2 vacuole fusion, non-autophagic molecular function unknown vacuolar membrane | YFL005W	-0.437743	-0.229352	0.192308	0.483767	0.152433	0.257105	0	-0.341676	0.113283	0.35621	0.316064	0.444133	0.541883	0	0.0589185	0.0960106	0.503668	0.735083	1.33083	0.928604
YJL035C	YJL035C ... TAD2 tRNA modification tRNA specific adenosine deaminase acytoplasm* | YJL036W	0.0663068	0.575177	0.675993	0.759169	1.17007	0.929239	0	-0.07741	0.556364	0.440492	0.627788	0.832132	0.672638	0	-0.606302	-0.270245	0.292633	0.37596	0.734224	0.31244
YNR037C	YNR037C ... RSM19 protein biosynthesis structural constituent of ribosome mitochondrial small ribosomal subun | YNR038W	-0.301977	0.558691	0.533547	-0.213332	1.04324	1.12135	0	0.43117	0.912786	0.499974	0.233366	0.963153	0.763921	0	-0.442803	0.192887	0.660742	0.535532	1.59961	1.21959
YPR008W	YPR008W ... HAA1 transcription initiation from specific RNA polymerase II transcrinucleus | YPR009W	0.387045	0.966791	0.527126	1.04705	0.764024	0.702144	0	0.129059	0.807525	0.947318	0.738042	0.84373	0.750292	0	0.0644419	0.871391	0.555528	0.940989	1.59103	0.970481
YMR195W	YMR195W ... ICY1 biological process unknown molecular function unknown vacuolar membrane (sensu Fungi) | YMR196W	-0.121823	0.309517	0.355904	1.81239	1.12644	0.606542	0	1.01935	1.27728	2.84589	2.66353	2.03438	1.78161	0	0.557197	0.97663	1.47919	2.83962	1.40794	1.37504
YBR045C	YBR045C ... GIP1 spore wall assembly (sensu Fun protein phosphatase 1 binding prospore membrane* | YBR046C	0.54916	0.557547	-0.188416	0.901399	1.64897	2.73207	0	0.659161	1.29481	1.47845	0.90154	0.548115	2.17311	0	0.277089	0.325338	0.987341	0.998323	1.12594	2.25298
YBR141C	YBR141C ... YBR141C biological process unknown molecular function unknown nucleolus | YBR142W	-0.170732	0.768331	0.486488	0.724354	1.23393	1.16007	0	-0.489869	0.703785	0.130988	0.0619444	0.637223	0.747651	0	-0.255717	0.120737	0.224841	0.441929	1.8751	0.89237
YPR140W	YPR140W ... TAZ1 phospholipid biosynthesis* acyltransferase activity mitochondrion | YPR141C	0.725079	1.13537	1.17435	1.39927	0.937237	1.14481	0	0.623241	1.22904	1.18777	1.3931	1.30231	1.46798	0	0.440241	0.864264	0.976772	1.48102	1.42947	1.37987
YHR179W	YHR179W ... OYE2 biological process unknown NADPH dehydrogenase activity cytoplasm* | YHR180C-B	0.443909	0.561067	0.451176	0.657447	1.34316	1.46048	0	0.00415693	0.151193	0.0578672	0.0645749	1.4142	1.30068	0	-0.234846	-0.315335	0.16839	0.373032	1.59063	1.13119
YLR069C	YLR069C ... MEF1 translational elongation translation elongation factor activmitochondrion | YLR070C	-0.40052	-0.359202	0.318579	0.802276	0.826919	0.887801	0	-0.336999	-0.0352175	0.452861	1.08297	0.725713	0.556474	0	0.0438876	0.146389	0.722889	1.17226	1.29429	0.935368
YEL041W	YEL041W … YEF1 biological process unknown molecular function unknown | ATP-NADH kinase; phosphorylates both NAD and NADH; homooctameric structure consisting of 60-kDa subunits; sequence similarity to Utr1p and Pos5p; overexpression complements certain pos5 phenotypesYEL042W	0.597452	1.10598	0.364125	1.76132	1.912	1.97493	0	0.746624	1.45468	1.26344	1.95843	2.56965	2.47346	0	0.142159	0.405881	0.858058	1.3574	1.94935	2.12199
YKL073W	YKL073W ... LHS1 response to unfolded protein* unfolded protein binding endoplasmic reticulum lumen | YKL074C	0.28701	0.503252	0.146641	0.616652	0.700259	0.780498	0	0.23391	0.474548	0.433588	0.337731	0.845216	0.978257	0	-0.251707	0.0483365	-0.0559119	0.286558	0.793374	0.636158
YLL009C	YLL009C ... COX17 cytochrome c oxidase complex a thioredoxin peroxidase activity* cytosol* | YLL010C	0.317206	1.09078	0.735895	0.929326	1.35714	1.35854	0	0.425908	1.07468	0.926403	1.12233	1.13216	0.797705	0	0.057626	0.844345	0.813805	1.31551	2.10959	1.28633
YMR089C	YMR089C ... YTA12 protein complex assembly* ATPase activity* cytoplasm* | YMR090W	0.0363317	0.859311	0.443411	0.775446	0.864434	0.715145	0	-0.046587	0.914829	0.661602	0.721224	1.08509	0.576294	0	-0.202644	0.788241	0.750901	1.04753	1.74496	0.983327
YLR392C	YLR392C ... YLR392C biological process unknown molecular function unknown cytoplasm | YLR393W	0.542238	0.839843	0.699557	1.00831	0.88928	0.676578	0	0.19562	1.06342	1.0004	0.915896	1.377	0.990481	0	-0.0427159	0.347215	0.439216	1.02432	1.94653	1.07035
YFR036W	YFR036W ... CDC26 mitotic sister chromatid segre protein binding* anaphase-promoting complex | YFR037C	0.641641	1.29514	1.10874	1.29782	1.09522	1.06706	0	0.90613	1.02627	1.0004	0.641708	0.944044	0.594935	0	0.447572	1.40403	0.699539	1.23212	1.18297	1.11002
YGL204C	YGL204C ... | YGL205W	-0.34761	0.65595	0.426294	0.660391	0.0819252	0.766021	0	0.832059	1.60822	0.858384	0.793931	1.20708	1.7977	0	0.787495	1.04794	1.30927	1.49018	1.04211	1.11573
YER137C	YER137C ... YER137C biological process unknown molecular function unknown cellular component unknown | YER138W-A	-0.907698	0.766133	0.889586	0.54936	0.459488	1.51634	0	-0.433285	1.28475	1.0004	0.423708	0.506639	1.45351	0	-0.764731	-0.22215	0.682487	0.556318	2.26572	0.984488
YDL049C	YDL049C ... KNH1 beta-1,6 glucan biosynthesis molecular function unknown cell wall (sensu Fungi)* | YDL050C	-0.382237	0.652265	0.3819	1.13956	2.0495	1.80246	0	0.786763	1.74248	0.295859	1.22347	0.563222	2.10625	0	0.00465594	0.555457	0.615373	0.965156	2.29276	2.46991
YGL236C	YGL236C ... MTO1 protein biosynthesis* molecular function unknown mitochondrion | YGL237C	-0.0546354	0.0776125	-0.0839434	0.428354	0.966166	1.20903	0	0.192729	0.457831	0.205683	0.604388	0.650013	0.540698	0	0.15553	0.261859	0.110756	0.477389	0.970373	0.906748
YKL001C	YKL001C ... MET14 methionine metabolism* adenylyl-sulfate kinase activity cytoplasm* | YKL002W	0.884763	1.11892	-0.40371	0.0643736	0.327038	0.828536	0	0.739779	1.38571	0.642641	0.988615	1.54812	1.81764	0	0.0745962	-0.0392862	0.152765	0.164572	2.21066	2.07376
YLR303W	YLR303W ... MET17 methionine metabolism* cysteine synthase activity* cytoplasm | YLR304C	0.735287	0.304659	-0.601227	-0.539761	1.63087	1.5931	0	1.1081	0.77317	1.20606	1.28232	2.55187	2.70645	0	0.452219	0.115703	-0.203762	-0.0748305	2.38924	2.99605
Q0060	Q0060 ... AI3 biological process unknown endonuclease activity mitochondrion | Q0065	-0.341573	0.56569	0.640965	1.28842	1.912	1.64961	0	-0.733409	0.333416	1.70822	1.46226	1.30019	1.12701	0	0.292697	0.986567	1.11133	1.56126	2.69531	0.814563
YBR001C	YBR001C ... NTH2 response to stress* "alpha,alpha-trehalase activity" cytoplasm* | YBR002C	0.431304	1.00165	1.46911	1.71516	0.940952	0.872642	0	0.849472	1.38916	0.614512	1.22037	0.845622	0.79965	0	1.00723	1.13294	1.06612	1.62976	1.33516	1.37077
YDL243C	YDL243C ... AAD4 aldehyde metabolism aryl-alcohol dehydrogenase activitycellular component unknown | YDL244W	0.788626	0.231514	1.47309	1.52289	2.51083	2.81793	0	0.966645	0.442707	1.20685	0.579612	1.55141	1.87019	0	0.431666	0.125773	0.778755	1.1536	2.3761	2.35986
YLL042C	YLL042C ... ATG10 protein-vacuolar targeting* ubiquitin-like conjugating enzyme acytoplasm | YLL043W	-0.345819	0.743413	0.990907	1.38476	1.21156	1.054	0	0.617341	0.958722	1.23487	0.685407	1.18471	1.43634	0	0.260804	0.625847	1.70723	1.38165	1.22619	1.30642
YHL014C	YHL014C ... YLF2 biological process unknown molecular function unknown mitochondrion | YHL015W	-0.333462	0.509794	0.910402	1.14382	1.38593	1.11826	0	-0.111357	0.890911	0.945542	0.68346	1.01901	0.890265	0	-0.442803	0.54141	0.728607	1.23069	1.94433	1.41903
YEL050C	YEL050C ... RML2 protein biosynthesis* structural constituent of ribosome mitochondrial large ribosomal subun | YEL051W	-0.311024	-0.112151	0.70847	0.815944	0.846782	1.01065	0	-0.150886	0.051701	0.696777	0.79686	0.666075	0.641585	0	0.112141	0.190345	0.86101	0.970593	1.26809	0.939223
YOR205C	YOR205C … GEP3 biological process unknown molecular function unknown mitochondrion | Protein of unknown function; null mutant is defective in respiration and interacts synthetically with prohibitin (phb1); the authentic, non-tagged protein is detected in purified mitochondria in high-throughput studiesYOR206W	-0.132513	0.665288	0.472203	0.95482	1.22911	0.97019	0	-0.341841	0.419897	0.308012	0.302681	0.842446	0.504003	0	-0.291284	0.23658	0.347931	0.670961	1.44227	0.790148
YDR033W	YDR033W ... MRH1 biological process unknown molecular function unknown mitochondrion* | YDR034C	0.691942	0.714611	0.34344	0.0941249	1.29739	1.82163	0	1.20653	1.05903	1.17205	0.0105376	1.45978	1.03209	0	1.71668	1.43579	2.25956	2.19723	1.37576	1.40262
YMR135C	YMR135C ... GID8 negative regulation of glucone molecular function unknown cytoplasm* | YMR135W-A	0.794502	1.03559	0.114147	0.257632	0.459488	1.7827	0	0.871365	0.820161	0.297385	0.447129	0.769673	1.7977	0	0.624311	1.18773	0.38162	0.601664	1.88916	2.63656
YPL019C	YPL019C ... VTC3 vacuole fusion, non-autophagic molecular function unknown vacuolar membrane | YPL020C	-0.762731	-0.689296	-0.318912	0.724825	0.0914965	0.544144	0	-0.175285	0.0629412	0.521236	0.717361	0.71325	1.20199	0	0.308132	0.264755	0.645268	1.33717	1.85896	1.46003
YDR031W	YDR031W … MIC14 biological process unknown molecular function unknown | Mitochondrial intermembrane space cysteine motif protein of 14 kDaYDR032C	-0.000807	0.801129	1.7064	1.19881	0.52671	0.971261	0	-0.0757334	0.969253	1.12969	1.06458	0.58559	0.8687	0	-0.00984363	0.255897	1.7947	1.49475	1.47095	1.33915
YDR259C	YDR259C ... YAP6 positive regulation of transcr RNA polymerase II transcription facnucleus | YDR260C	0.80683	1.16401	-0.121302	-0.517946	0.961244	0.995108	0	0.0879515	0.684648	0.408061	0.190208	1.00985	1.13185	0	0.0877117	0.809982	0.326828	1.26903	1.47553	0.932649
YNR011C	YNR011C ... PRP2 U2-type catalytic spliceosome "RNA splicing factor activity, trans"nucleus* | YNR012W	-0.132052	0.218992	0.174457	0.199487	0.762623	0.806841	0	-0.377531	-0.0289998	0.262071	0.039044	0.849231	0.707583	0	-0.671744	-0.0522253	-0.088386	0.383613	1.57416	1.12571
YGL226W	YGL226W … MTC3 biological process unknown molecular function unknown | Protein of unknown function; green fluorescent protein (GFP)-fusion protein localizes to the mitochondrion; mtc3 is synthetically sick with cdc13-1YGL227W	-0.213801	0.235619	0.586517	0.406635	1.03753	1.40192	0	-0.391465	0.102163	0.415441	0.294301	0.818036	1.25254	0	-0.208338	-0.064609	0.724307	0.825486	0.882239	1.43195
YDR357C	YDR357C ... YDR357C biological process unknown molecular function unknown cytoplasm | YDR358W	0.092302	1.04853	0.618939	0.963783	0.719355	0.790967	0	0.692245	1.30936	1.24833	0.893846	1.56322	1.22655	0	-0.6392	0.475287	1.18374	1.3141	1.47917	0.569451
YJL131C	YJL131C … AIM23 biological process unknown molecular function unknown | Putative protein of unknown function; the authentic non-tagged protein is detected in highly purified mitochondria; null mutant is viable, displays severe respiratory growth defect and elevated frequency of mitochondrial genome lossYJL132W	0.251959	0.750503	1.44901	0.788548	0.475901	0.358615	0	-0.308394	0.722229	1.41544	0.780732	0.753906	0.744155	0	-0.605074	0.474458	2.00229	1.4599	2.05332	1.37077
YBL022C	YBL022C ... PIM1 proteolysis and peptidolysis* ATP-dependent peptidase activity mitochondrial matrix | YBL023C	0.276312	1.17175	0.25447	0.773451	1.00026	0.682314	0	-0.0584831	1.09681	0.567245	0.637399	0.894111	0.558516	0	-0.388931	0.969179	0.476811	0.876728	1.63668	1.14333
YPR040W	YPR040W ... TIP41 signal transduction molecular function unknown cytoplasm* | YPR041W	0.671726	1.27936	0.76578	0.293774	1.26564	0.430045	0	0.608091	1.14833	0.619313	0.388986	1.23879	0.457161	0	0.108607	0.642498	0.235269	0.107257	1.85357	1.03179
YLR142W	YLR142W iESR cluster PUT1 glutamate biosynthesis* proline dehydrogenase activity mitochondrion | YLR143W	1.22006	0.760972	1.2039	1.03479	2.15993	0.423951	0	1.13826	0.67332	0.939003	0.191047	1.69251	1.52611	0	1.7727	1.90595	1.89423	1.44311	2.88599	2.11694
YHR195W	YHR195W ... NVJ1 microautophagy protein binding nuclear membrane | YHR196W	0.159416	1.15845	0.0774779	0.667771	0.737971	0.341283	0	0.116912	1.51881	0.545565	0.500492	0.800758	0.307379	0	-0.0381075	1.02578	0.5918	0.840141	1.61016	1.28672
YCR088W	YCR088W ... ABP1 establishment of cell polarity protein binding cytoplasm* | YCR089W	-0.0436061	0.41405	-0.298256	-0.0544424	0.436813	0.104839	0	-0.214318	0.391782	0.11863	0.0725244	0.476947	0.0484877	0	-0.35682	0.508746	-0.217276	0.107029	1.37953	0.910257
YJL101C	YJL101C ... GSH1 response to cadmium ion* glutamate-cysteine ligase activity intracellular | YJL102W	0.747765	0.786832	-0.108043	0.297462	0.670568	0.842419	0	0.39128	0.588526	0.199824	0.285648	0.763571	0.773023	0	0.327795	0.277895	0.190783	0.475467	1.18066	1.10252
YLR383W	YLR383W ... SMC6 DNA repair* molecular function unknown nucleus* | YLR384C	-0.537515	0.868944	0.401708	0.795651	0.564077	0.362428	0	-0.596784	0.705741	-0.0349296	0.742326	0.287249	0.68058	0	-0.631248	0.343953	0.434024	0.882845	1.9209	1.11659
YLR080W	YLR080W iESR cluster EMP46 ER to Golgi transport molecular function unknown Golgi membrane* | YLR081W	0.288699	-0.0639417	-0.381061	1.39736	1.49696	0.802463	0	1.05857	0.902138	0.170328	1.73948	1.30019	1.16765	0	0.257637	0.585205	-0.690731	2.08579	2.34167	2.21715
YGL081W	YGL081W ... YGL081W biological process unknown molecular function unknown cellular component unknown | YGL082W	-0.0638172	1.15845	1.17148	1.81239	2.23393	2.14711	0	-0.641872	1.21764	-0.736562	1.36097	1.88515	0.90462	0	-1.33589	1.77785	0.665413	2.05722	3.75671	2.64745
YDL110C	YDL110C … iESR cluster TMA17 biological process unknown molecular function unknown | Protein of unknown function that associates with ribosomes; heterozygous deletion demonstrated increases in chromosome instability in a rad9 deletion background; protein abundance is decreased upon intracellular iron depletionYDL111C	0.829268	1.49405	0.867326	1.27183	1.37143	0.997418	0	0.107652	1.1711	0.504446	0.392681	0.607616	0.248574	0	-0.553361	0.592818	0.375907	0.542643	2.01974	1.7759
YML099C	YML099C ... ARG81 arginine metabolism* transcription cofactor activity nucleus | YML099W-A	0.307203	0.522891	0.386931	0.501907	0.835548	0.984615	0	0.143664	0.218442	0.29702	0.265369	0.664308	0.836111	0	-0.321637	-0.205407	-0.196371	0.211497	0.868601	0.433619
YNL191W	YNL191W … DUG3 biological process unknown molecular function unknown | Probable glutamine amidotransferase, forms a complex with Dug1p and Dug2p to degrade glutathione (GSH) and other peptides containing a gamma-glu-X bond in an alternative pathway to GSH degradation by gamma-glutamyl transpeptidase (Ecm38p)YNL192W	0.374123	0.702515	0.583062	0.958831	0.902477	0.738261	0	0.336102	0.390549	0.48583	0.621016	0.827047	0.815089	0	-0.0850987	0.136931	0.439854	0.604044	1.46878	1.10346
YGR043C	YGR043C … iESR cluster NQM1 biological process unknown transaldolase activity | Transaldolase of unknown function; transcription is repressed by Mot1p and induced by alpha-factor and during diauxic shiftYGR044C	0.899657	-0.0639417	0.770942	0.882784	3.37143	1.53943	0	1.696	1.6651	1.2228	1.20897	3.69251	2.29694	0	-0.0642914	-0.359654	-0.597621	0.998323	2.92663	2.30642
YPR167C	YPR167C ... MET16 methionine metabolism* phosphoadenylyl-sulfate reductase (cytoplasm* | YPR168W	-0.58577	0.936058	-0.347894	0.148185	0.564077	0.138066	0	-0.0669632	1.25159	1.69308	1.28959	1.56965	1.48958	0	-0.0504856	0.737208	-0.046606	0.740254	2.17817	1.85238
YKL094W	YKL094W ... YJU3 biological process unknown serine hydrolase activity cytoplasm* | YKL095W	1.02962	1.54224	0.913682	0.986303	0.956762	0.859661	0	0.802858	1.43856	0.58092	0.565205	0.741877	0.512457	0	-0.10007	0.410118	0.501026	0.609636	1.22383	0.486407
Q0050	Q0050 ... AI1 mRNA processing* endonuclease activity* mitochondrion | Q0055	-0.456008	0.847932	0.33901	0.605687	2.17765	1.92942	0	-0.72705	0.424771	0.85591	0.155754	1.94915	1.97705	0	-0.535353	0.612525	1.2584	0.88937	2.89374	1.98506
YOR212W	YOR212W ... STE4 signal transduction during con GTPase activity plasma membrane* | YOR213C	-0.448266	-0.53601	0.770942	1.07543	2.78647	0.691431	0	0.0261462	0.269423	0.737369	0.956582	3.25438	1.43513	0	-0.272878	-0.893528	1.72431	1.41336	3.02973	0.858957
YHR127W	YHR127W ... YHR127W biological process unknown molecular function unknown nucleus | YHR128W	-0.170732	0.417591	0.096986	0.218686	0.603878	0.459055	0	-0.550889	0.676718	0.000403	0.265959	0.243604	0.265807	0	-0.824232	0.0943234	0.319538	0.433043	1.91425	1.0334
YHR043C	YHR043C ... DOG2 response to stress* 2-deoxyglucose-6-phosphatase activicytoplasm* | YHR044C	0.760005	-0.136091	0.897342	0.832858	1.20418	0.970113	0	0.532499	0.637696	1.0004	1.03904	1.31483	1.07577	0	-0.157401	-0.409777	0.720826	1.03227	1.67338	1.02788
YDR316W	YDR316W ... OMS1 biological process unknown S-adenosylmethionine-dependent methmitochondrion* | YDR317W	-0.577053	0.894238	0.919517	0.538401	1.17503	1.43251	0	-0.805254	0.593885	0.988125	0.780459	0.650685	0.924519	0	-1.1367	0.77785	0.805138	1.43066	2.39478	1.50572
YDR515W	YDR515W ... SLF1 copper ion homeostasis* RNA binding cytoplasm* | YDR516C	0.217538	0.936058	0.695325	0.511047	1.38232	1.13673	0	-0.122005	0.7008	1.36865	0.644133	0.75962	0.892746	0	-0.775378	0.00340945	0.853415	0.967596	2.39575	1.59678
YJL213W	YJL213W ... YJL213W biological process unknown molecular function unknown cellular component unknown | YJL214W	0.190265	0.678726	-0.0407431	0.523182	0.851289	0.682534	0	0.328222	1.02703	0.402871	1.44579	1.37171	0.913722	0	0.324949	1.13087	-0.781839	0.0881193	2.08338	1.61735
YOL031C	YOL031C ... SIL1 SRP-dependent cotranslational molecular function unknown endoplasmic reticulum | YOL032W	0.139354	0.531747	0.246637	0.750401	1.09671	0.768078	0	0.0484866	0.400834	0.122394	0.157851	1.08219	0.670461	0	-0.279445	-0.345725	0.19266	0.396231	0.916431	0.512798
YIL107C	YIL107C iESR cluster PFK26 fructose 2,6-bisphosphate meta 6-phosphofructo-2-kinase activity cytoplasm | YIL108W	1.08261	0.952178	0.813208	0.956376	0.997392	0.410145	0	0.815997	1.14157	1.66747	1.12903	0.867448	0.975009	0	0.692357	1.00256	1.12662	1.52499	2.08566	1.28405
YJR119C	YJR119C … JHD2 biological process unknown molecular function unknown | JmjC domain family histone demethylase specific for H3-K4 (histone H3 Lys4); removes methyl groups specifically added by Set1p methyltransferase; protein levels regulated by Not4p (E3 ubiquitin ligase) polyubiquitin-mediated degradationYJR120W	0.444604	0.647432	0.303583	1.0874	0.774497	0.544289	0	0.619456	0.979306	0.898042	0.87362	1.16268	1.06059	0	1.047	0.832298	1.07364	1.97408	1.50022	1.13535
Q0297	Q0297 ... | YAL001C	-0.587787	0	1.05706	0.368211	1.2232	1.28729	0	0	0	-0.0958118	0.208969	1.63806	1.14789	0	0	0.406563	1.18289	0.135826	0.956017	0.300516
YMR267W	YMR267W ... PPA2 aerobic respiration inorganic diphosphatase activity mitochondrion | YMR268C	-0.256018	0.035594	0.564491	0.764936	0.74599	0.567014	0	-0.415956	0.319599	0.476195	0.322974	0.653143	0.525242	0	-0.374699	-0.156966	0.382856	0.675916	1.36928	0.922522
YIL168W	YIL168W	0.829268	1.52102	0.323483	1.07543	3.14904	2.73207	0	0.37407	-0.00475225	-0.169522	1.15452	2.66276	1.93804	0	0.935709	1.09978	-0.0126587	0.872792	2.75671	1.42743
YGR256W	YGR256W iESR cluster GND2 glucose metabolism phosphogluconate dehydrogenase (deccytosol | YGR257C	1.0309	1.32838	0.864051	2.00143	1.57497	1.62516	0	1.4247	2.16517	1.02688	1.41756	2.00063	2.58912	0	1.09325	1.94777	-0.243984	1.26136	1.49367	2.08402
YPR047W	YPR047W ... MSF1 protein biosynthesis phenylalanine-tRNA ligase activity mitochondrion | YPR048W	0.18411	0.56409	0.50945	0.813495	0.976956	1.11164	0	0.33795	1.13076	0.540972	0.770493	0.776774	0.90462	0	-0.0347183	0.852397	0.625322	0.922002	1.52559	1.09628
YHR037W	YHR037W ... PUT2 glutamate biosynthesis* 1-pyrroline-5-carboxylate dehydrogemitochondrion | YHR038W	0.492047	0.544228	0.492385	1.03196	0.721039	0.757164	0	0.495774	0.613613	0.324578	0.811726	0.678397	0.664762	0	0.937878	0.837055	0.906421	1.35188	1.44652	1.49487
YLR382C	YLR382C ... NAM2 Group I intron splicing* mRNA binding* mitochondrion | YLR383W	-0.390954	0.452849	0.579999	0.816461	1.03976	0.944078	0	-0.388365	0.387917	0.538237	0.931905	0.695048	0.760644	0	-0.156064	0.654335	0.581548	0.8659	1.43367	1.05368
YDR275W	YDR275W ... BSC2 biological process unknown molecular function unknown lipid particle | YDR276C	0.688224	1.49112	1.13977	0.699461	1.05884	1.30239	0	0.435386	1.0497	0.383732	0.039044	1.03199	1.26962	0	-0.220411	0.697996	0.692598	0.409111	2.23476	1.36636
YKR071C	YKR071C ... DRE2 biological process unknown molecular function unknown cytoplasm | YKR072C	0.626834	0.993192	0.698236	1.01216	0.805913	0.878915	0	0.329598	0.784901	0.950305	0.803208	1.01628	0.972698	0	0.0964026	0.418888	0.590246	0.857444	1.34346	0.585525
YBL029W	YBL029W ... YBL029W biological process unknown molecular function unknown cytoplasm* | YBL030C	0.23063	0.111145	1.10437	0.360831	0.648966	0.432513	0	0.874968	0.670408	1.07079	0.396596	1.71523	1.33088	0	1.93256	1.49608	3.26533	1.61303	3.40696	3.11377
YCL035C	YCL035C iESR cluster GRX1 response to oxidative stress* thiol-disulfide exchange intermediacytoplasm* | YCL036W	0.408627	1.23744	0.819472	0.689686	0.548493	0.272642	0	0.632303	1.50032	1.08339	0.941489	1.0286	0.800031	0	-0.11418	0.405881	0.652303	0.623413	1.65131	0.930525
YPL248C	YPL248C ... GAL4 regulation of transcription, D transcriptional activator activity nucleus | YPL249C	-0.218038	0.673024	1.14587	1.03103	1.32704	0.981101	0	0.489035	1.83655	1.34999	1.26144	1.73557	1.0815	0	0.831819	2.65232	0.940036	1.12385	1.58268	1.27684
YDR533C	YDR533C iESR cluster HSP31 biological process unknown unfolded protein binding* soluble fraction | YDR534C	1.33528	1.05931	0.758003	0.490466	1.76615	1.52562	0	1.24265	0.947682	0.778011	0.392681	1.70827	1.54205	0	1.58048	1.13216	1.86298	1.58625	3.07864	3.1896
YDR030C	YDR030C ... RAD28 DNA repair molecular function unknown nucleus | YDR031W	0.118774	0.820581	1.25637	0.804127	0.742075	0.397654	0	0.0406458	-0.120229	-0.469082	0.494723	1.23879	0.472904	0	-0.0891661	-0.0156994	0.904879	0.77593	1.9791	1.39329
Cluster_2	#N/A	0	0	0	0	0	0	0	0	0	0	0	0	0	0	0	0	0	0	0	0
YGL123C-A	YGL123C-A … Dubious Dubious open reading frame unlikely to encode a protein, based on available experimental and comparative sequence data; overlaps the verified gene RPS2/YGL123WYGR027W-A	-1.17073	-0.996827	-0.966024	-0.384003	-0.0879998	1.25145	0	-0.985826	-0.589715	-0.612573	-0.250463	0.119616	-0.247383	0	0.307219	-1.02951	-0.465171	0.824293	0.424132	-0.115048
YLL061W	YLL061W ... MMP1 S-methylmethionine transport S-methylmethionine transporter actiplasma membrane | YLL062C	-0.459393	-0.723423	-0.402664	-0.672508	1.52327	1.31236	0	-0.372361	-0.506022	-0.0368294	0.0585842	0.222923	0.305582	0	-0.230606	-0.46854	-0.337653	-0.32771	1.66065	2.03439
YER042W	YER042W ... MXR1 response to oxidative stress protein-methionine-S-oxide reductascytoplasm* | YER043C	-0.966499	-0.957026	-0.931138	-0.761721	0.608296	0.394171	0	-0.723161	-0.228378	-0.754326	-0.0717151	0.865455	0.896359	0	-0.761411	-0.591076	-0.479043	-0.129685	1.48287	1.11061
YBR115C	YBR115C ... LYS2 lysine biosynthesis, aminoadip L-aminoadipate-semialdehyde dehydrocytoplasm | YBR116C	0.0914103	0.297271	0.230488	0.496341	0.490654	0.746793	0	-0.357114	-0.350527	1.29001	1.11962	1.20742	1.33126	0	-0.245652	-0.184499	-0.614326	-0.353686	-0.434548	-0.474394
YER055C	YER055C ... HIS1 histidine biosynthesis ATP phosphoribosyltransferase activintracellular | YER056C	-1.17398	-0.944632	-2.15646	-1.4933	-0.21097	-0.310629	0	-0.528774	-0.268186	-0.121952	0.0172278	0.661049	0.41879	0	-0.549768	-0.978535	-0.922984	-0.875147	0.00773397	-0.14418
YOR222W	YOR222W ... ODC2 mitochondrial transport intracellular transporter activity*mitochondrial inner membrane | YOR223W	0.0184931	0.404338	0.741613	0.796865	1.00177	0.746457	0	-0.216172	0.340845	1.26864	1.04751	1.38335	1.08766	0	-1.20179	-0.780246	-0.390947	-0.529106	0.0272076	-0.187245
YDL182W	YDL182W ... LYS20 lysine biosynthesis, aminoadip homocitrate synthase activity nucleus* | YDL183C	-1.28015	-1.43244	-0.0499565	0.592299	0.593994	0.669948	0	-1.28096	-1.05285	0.870082	1.03534	1.16051	1.29183	0	-0.924851	-0.960595	-0.888005	0.0672645	-0.413299	-0.678613
YBR291C	YBR291C ... CTP1 mitochondrial citrate transpor tricarboxylate carrier activity mitochondrial inner membrane | YBR292C	-0.460239	-0.16045	1.01976	1.01683	0.976351	0.707436	0	-0.136161	0.193187	1.6348	1.77601	1.74853	1.5302	0	-0.418419	-0.654261	-0.080222	0.135174	-0.279169	-0.889023
YLR056W	YLR056W ... ERG3 ergosterol biosynthesis C-5 sterol desaturase activity endoplasmic reticulum | YLR057W	-0.00763486	-0.32885	0.643493	0.609909	0.262442	0.168661	0	0.131545	-0.215236	1.20424	0.743837	0.712134	0.622085	0	-0.208229	-0.689152	-0.234942	-0.490842	-0.514254	-0.558904
YER028C	YER028C ... MIG3 negative regulation of transcr DNA binding* nucleus | YER029C	-0.0638172	0.61678	0.0339762	0.188639	1.96263	1.61343	0	-0.390333	-0.310855	0.812776	0.816652	2.10016	0.97862	0	-2.04371	-1.78605	-0.910779	-0.709497	-0.591216	-0.356549
YGR238C	YGR238C ... KEL2 conjugation with cellular fusi molecular function unknown bud neck* | YGR239C	-1.23707	-0.372694	0.00131003	0.650931	0.805085	0.805851	0	-0.417166	-0.249375	0.905858	1.48902	0.930238	1.03238	0	-0.543497	0.189575	0.550609	1.10726	1.13698	0.365737
YAR015W	YAR015W ... ADE1 purine nucleotide biosynthesis phosphoribosylaminoimidazolesuccinocytoplasm* | YAR018C	-0.295624	0.0486502	-1.06556	-0.580456	0.27457	-0.359887	0	0.133975	0.320918	0.636896	0.62578	1.79889	1.13275	0	-0.308502	-0.189729	-0.131053	-0.244623	1.45979	0.623969
YOR128C	YOR128C ... ADE2 purine nucleotide biosynthesis phosphoribosylaminoimidazole carboxcytoplasm | YOR129C	-0.0549179	0.313532	-0.84573	-0.710703	0.361997	-0.261374	0	0.134029	0.401494	0.22555	0.339998	1.63943	0.833957	0	-0.168122	0.0676015	-0.115127	-0.175325	1.29182	0.512137
YMR026C	YMR026C ... PEX12 peroxisome organization and bi protein binding peroxisomal membrane | YMR027W	-1.48524	-0.690127	-0.0781342	0.159821	0.627433	0.263119	0	-0.666876	-0.296518	0.258936	0.0986328	0.979929	0.559205	0	-0.465287	-0.201972	-0.0536859	0.146845	0.994287	0.442036
YMR062C	YMR062C ... ECM40 cell wall organization and bio amino-acid N-acetyltransferase actimitochondrial matrix | YMR063W	-0.116794	-0.187677	-0.376957	-0.255544	0.498083	0.36802	0	0.111035	0.264855	1.0004	0.638362	1.62715	1.24032	0	0.13297	-0.25547	-0.499319	-0.432835	0.362813	-0.00860911
YHR047C	YHR047C … AAP1 proteolysis and peptidolysis* aminopeptidase activity cytoplasm* | Arginine/alanine aminopeptidase, overproduction stimulates glycogen accumulationYHR048W	-0.521675	-0.389463	-0.113277	0.362359	0.0137242	0.235692	0	-1.30576	-1.1182	0.196298	0.419703	0.103235	0.120027	0	-0.219533	-0.266612	-0.419376	-0.138162	-0.156957	-0.205207
YJR137C	YJR137C ... ECM17 cell wall organization and bio sulfite reductase (NADPH) activity cytoplasm* | YJR138W	-0.123494	-0.0817529	-0.513889	0.0445969	-0.0568389	0.130623	0	-0.258497	-0.322813	0.754262	0.854579	0.691605	0.744905	0	-0.0235959	-0.215527	-0.313099	0.123704	1.20983	1.31586
YHR022C	YHR022C ... YHR022C biological process unknown molecular function unknown cellular component unknown | YHR022C-A	-0.632637	-0.144862	0.671406	1.04628	-0.198183	0.515086	0	-0.908864	-0.928131	0.078406	0.0956275	-0.84476	0.0409413	0	-1.63263	-1.14553	-0.0951208	0.212447	-1.04535	-0.701403
YOL058W	YOL058W ... ARG1 arginine biosynthesis* argininosuccinate synthase activitycytosol | YOL059W	-0.829565	-0.71672	-0.703378	-0.0579309	-0.586065	-0.563629	0	-0.49609	-0.349556	1.12491	0.720315	0.419424	0.204576	0	-0.92823	-1.1457	-0.67242	-0.398309	-0.0759911	-0.30955
YJL200C	YJL200C … ACO2 biological process unknown aconitate hydratase activity | Putative mitochondrial aconitase isozyme; similarity to Aco1p, an aconitase required for the TCA cycle; expression induced during growth on glucose, by amino acid starvation via Gcn4p, and repressed on ethanolYJL201W	-1.31891	-0.851664	0.455735	0.49654	0.457306	0.546941	0	-0.92241	-0.646785	1.05795	1.00063	1.15268	1.03009	0	-0.850964	-0.850956	-0.0497029	0.187747	0.482586	-0.231766
YOR315W	YOR315W … SFG1 biological process unknown molecular function unknown | Nuclear protein, putative transcription factor required for growth of superficial pseudohyphae (which do not invade the agar substrate) but not for invasive pseudohyphal growth; may act together with Phd1p; potential Cdc28p substrateYOR316C	-0.965263	-0.654584	0.17938	0.645744	0.884461	0.855184	0	-0.9846	-1.07741	0.406213	-0.209079	0.857611	0.36053	0	-0.942036	-0.965745	-0.421898	-0.156459	0.807334	-0.0604244
YIR034C	YIR034C ... LYS1 lysine biosynthesis, aminoadip "saccharopine dehydrogenase (NAD+, L"cytoplasm* | YIR035C	-0.48991	-0.516764	0.569372	0.839898	0.426573	0.352567	0	-0.389893	-0.173206	2.2889	2.21766	1.80003	1.59805	0	-0.214131	-0.507737	-0.0977402	0.302027	-0.618801	-0.569568
YLR359W	YLR359W ... ADE13 purine nucleotide biosynthesis adenylosuccinate lyase activity cellular component unknown | YLR360W	-0.111982	0.0379555	-0.849737	-0.469371	0.112233	-0.136658	0	0.0202286	0.0174258	0.19814	0.463297	1.15582	0.954925	0	-0.175136	-0.225236	-0.3106	-0.346651	0.540864	0.0345287
YCL030C	YCL030C ... HIS4 histidine biosynthesis phosphoribosyl-ATP diphosphatase acintracellular | YCL031C	-0.456092	-0.164083	-1.94471	-1.14933	0.492568	0.265775	0	0.681852	0.658324	1.26598	1.14502	1.99809	1.39522	0	-0.231422	-0.270987	-0.86534	-0.899547	0.321344	0.264944
YGR177C	YGR177C ... ATF2 steroid metabolism alcohol O-acetyltransferase activitcytoplasm* | YGR178C	-1.07933	-1.10964	-0.386483	0.0787542	0.0980372	0.170725	0	-1.12406	-1.17677	0.0293334	0.0806105	0.431331	0.540022	0	-0.595563	-0.690107	-0.595458	-0.437581	-0.194486	-0.294029
YNR050C	YNR050C ... LYS9 lysine biosynthesis, aminoadip "saccharopine dehydrogenase (NADP+,"cytoplasm | YNR051C	-0.389078	-0.466917	0.760012	0.924351	0.761076	0.78192	0	-0.514288	-0.416846	1.48072	1.49738	1.41446	1.56186	0	-0.46013	-0.698375	0.00201101	0.0696371	-0.093164	-0.228999
Cluster_3	#N/A	0	0	0	0	0	0	0	0	0	0	0	0	0	0	0	0	0	0	0	0
YOR062C	YOR062C ... YOR062C biological process unknown molecular function unknown cytoplasm* | YOR063W	0.191838	0.579915	0.729122	2.01885	-0.251499	-0.559389	0	-0.33375	-0.0978617	-0.806951	1.14596	-0.674277	-1.02667	0	-0.502924	-0.0126969	0.0544555	1.54581	0.306905	-0.106277
YLR218C	YLR218C ... YLR218C biological process unknown molecular function unknown cytoplasm* | YLR219W	-0.673233	-0.938411	1.25637	-0.702179	1.0495	0.480535	0	0.123108	0.343171	1.58537	0.702009	1.02265	-0.154274	0	-0.945303	-0.511657	1.48984	0.839625	2.68271	1.44916
YDL039C	YDL039C ... PRM7 conjugation with cellular fusi molecular function unknown integral to membrane | YDL040C	-0.180553	-0.318259	3.18422	2.75189	1.67269	1.61728	0	-0.20225	-0.697471	4.11046	2.74739	0.784546	1.10138	0	0.610049	0.128633	3.44357	4.0505	2.51519	0.974573
YOR313C	YOR313C ... SPS4 sporulation (sensu Fungi)* molecular function unknown cellular component unknown | YOR314W	-0.644664	-1.41758	0.686053	0.660391	0.970894	1.63019	0	-0.755213	-1.20639	-1.22199	-0.22399	0.107543	0.474936	0	-0.999196	-1.04527	1.26745	0.805678	1.56406	0.668014
YGR035C	YGR035C ... YGR035C biological process unknown molecular function unknown cellular component unknown | YGR035W-A	0.641545	0.663374	1.34948	1.23006	-0.0879998	-0.0898344	0	1.3883	1.61192	2.10474	1.54834	1.31116	1.46658	0	-1.10577	-1.22215	-0.504512	-0.832923	-0.40635	-1.35866
YKL044W	YKL044W ... | YKL045W	-0.452503	-0.732736	0.841331	0.696917	0.233928	1.39504	0	-0.232664	-0.958949	0.115881	1.03904	1.13308	1.0201	0	0.533738	0.266597	2.37966	2.56467	3.11426	3.64745
YLR037C	YLR037C ... DAN2 biological process unknown molecular function unknown cell wall (sensu Fungi) | YLR038C	0.457299	-0.411865	1.49341	2.66039	0.104645	-1.1424	0	-0.111357	-0.642182	1.0004	3.36097	0.88515	2.78504	0	-0.0948797	0.670935	1.44677	3.99832	0.271281	0.917374
YDL037C	YDL037C ... BSC1 biological process unknown molecular function unknown cellular component unknown | YDL039C	-0.132564	-0.324177	2.7598	2.31829	1.50552	0.980817	0	-0.223937	-0.668885	3.75117	2.2819	0.569649	0.296198	0	0.645342	0.149341	2.76264	3.81253	2.33306	0.74911
YFL014W	YFL014W iESR cluster HSP12 response to oxidative stress* molecular function unknown cytoplasm* | YFL015C	-1.75569	-3.23387	2.03398	2.53486	2.49696	0.2175	0	-0.111357	-1.17468	0.107626	0.039044	1.47011	-0.417308	0	1.5572	0.695388	-0.0126587	1.32025	3.21614	1.91049
YFL051C	YFL051C ... YFL051C biological process unknown molecular function unknown cellular component unknown | YFL052W	-1.33379	-1.60684	1.33464	0.750028	0.0262732	0.432826	0	-0.877994	-1.62427	1.03517	0.196585	-0.282234	0.0128891	0	-0.960526	-1.6118	2.95622	2.80171	0.932532	0.32873
YDR042C	YDR042C ... YDR042C biological process unknown molecular function unknown cellular component unknown | YDR043C	-1.00723	-0.633307	0.979528	0.907701	-0.244725	-1.07932	0	-0.558816	-1.17076	0.530918	-0.0331058	-1.11485	-1.23935	0	0.537832	0.0487037	2.60749	2.1002	0.463661	-0.4881
YKL043W	YKL043W ... PHD1 pseudohyphal growth specific RNA polymerase II transcrinucleus | YKL044W	-0.917205	-0.850235	-0.0440263	0.715886	1.49696	1.09053	0	-0.64741	-0.703173	-0.528706	0.343899	1.63517	1.30572	0	0.650084	0.369532	1.83745	2.985	4.38474	3.54771
YDR273W	YDR273W ... DON1 meiosis* molecular function unknown spindle* | YDR274C	0.457299	0.39549	1.61894	1.33846	0.327038	-0.350923	0	0.952773	0.165173	0.585366	0.524471	-0.699812	-1.44141	0	-0.902235	-0.414795	1.15727	2.13583	1.49367	0.486454
YJR149W	YJR149W ... YJR149W biological process unknown molecular function unknown cytoplasm | YJR150C	0.982514	0.174218	1.06306	1.73622	1.30246	1.93997	0	0.473605	0.368057	-0.012712	0.563203	-0.491413	0.238044	0	0.506571	0.178948	-0.178509	0.190968	-0.0264808	0.732949
YOR374W	YOR374W iESR cluster ALD4 ethanol metabolism aldehyde dehydrogenase (NAD) activimitochondrion* | YOR375C	1.34138	1.0216	1.96171	2.10287	2.71752	2.04849	0	-1.26701	-1.60283	0.094201	0.61861	-1.50237	-1.87355	0	0.908337	1.39083	0.535872	0.69075	0.232945	1.15834
YCR104W	YCR104W ... PAU3 biological process unknown molecular function unknown cellular component unknown | YCR105W	1.05166	-1.6489	-1.55099	-0.924571	0.175035	-0.0980017	0	1.11104	-0.267787	0.415441	0.624006	0.370577	3.56283	0	-0.0277655	1.83674	0.987341	2.90521	0.0197422	0.569451
Q0075	Q0075 ... AI5_BETA biological process unknown molecular function unknown mitochondrion | Q0080	0	0	0	0	1.95241	2.44479	0	0	0	0	0	0.949281	1.28724	0	0	-3.36467	0	0	0.955488	0.968368
YJL038C	YJL038C … LOH1 biological process unknown molecular function unknown | Protein of unknown function with proposed role in maintenance of genome integrity; deletion mutant displays elevated rates of LOH; induced during sporulation; repressed during vegetative growth by Sum1p and Hst1p; sequence similar to IRC1YJL039C	-2.66871	-2.51615	2.69259	1.07543	2.35684	-0.267927	0	-2.60933	0	1.0004	1.62401	-0.11485	0.582692	0	-2.94078	-1.67436	2.30927	3.32025	3.84417	2.12199
YOR012W	YOR012W ... YOR012W biological process unknown molecular function unknown cellular component unknown | YOR013W	0.876573	0.990506	3.73442	1.38001	1.76998	1.34351	0	0.888643	1.0497	1.58537	1.08059	1.88515	1.66543	0	0.109738	0.325338	3.15727	0.525298	1.00464	0.814563
YPR194C	YPR194C ... OPT2 oligopeptide transport oligopeptide transporter activity integral to plasma membrane | YPR195C	0.378114	0.0284224	3.10437	2.72751	-1.088	-1.58985	0	0.126241	-0.237115	-0.736562	-1.76831	0.470113	0.167654	0	0.208267	-0.10759	3.12484	0.463986	1.07864	1.363
YOL152W	YOL152W ... FRE7 biological process unknown ferric-chelate reductase activity cellular component unknown | YOL154W	-0.335792	-1.59999	1.42789	2.62797	0.461796	0.764135	0	-1.99888	-1.77527	-0.381467	1.03904	-0.622387	0.18822	0	1.19323	0.0897938	-0.684036	2.87279	-0.455663	0.387316
YOL158C	YOL158C ... ENB1 ferric-enterobactin transport ferric-enterobactin transporter actintegral to membrane* | YOL159C	-4.1329	-3.98034	0.405964	0.956933	0.956089	1.09818	0	0	0	1.16557	1.08188	1.6235	1.80527	0	0	-4.13855	-1.33608	-1.22841	-0.111993	0.192218
YIR027C	YIR027C ... DAL1 allantoin catabolism allantoinase activity intracellular | YIR028W	-4.31369	-3.94658	-0.346296	-0.0901573	0.839139	-2.07528	0	-0.751815	-1.36383	-0.227866	0.803556	-0.377884	0.682227	0	-0.585761	-0.61294	-0.0126587	0.611968	1.34167	1.2646
YER079W	YER079W iESR cluster YER079W biological process unknown molecular function unknown cytoplasm* | YER080W	0.966771	0.199093	1.87048	2.19091	-0.45057	-0.138644	0	1.53634	-0.00475225	1.94794	0.541544	0.174657	0.428182	0	1.23527	0.688582	2.22438	1.96795	0.444764	1.23242
YJR025C	YJR025C iESR cluster BNA1 NAD biosynthesis "3-hydroxyanthranilate 3,4-dioxygena"cytoplasm | YJR030C	-2.75569	-1.06394	-0.966024	-0.602643	-1.81735	-1.34885	0	1.696	2.36448	3.02524	1.6829	0.952265	1.012	0	1.83022	1.44081	0.883506	1.18154	0.662071	0.82518
YLL025W	YLL025W … PAU17 biological process unknown molecular function unknown | Putative protein of unknown function; YLL025W is not an essential geneYLL026W	1.41423	-1.24228	0.841331	1.24535	0.564077	0.110585	0	1.23657	-0.573036	-0.584559	0.498476	0.984686	3.4219	0	1.05196	0.0520247	-0.13819	3.96411	0.649793	0.186122
YOR347C	YOR347C ... PYK2 glycolysis* pyruvate kinase activity cytosol | YOR348C	0.908702	0.569115	1.7619	2.13128	-0.0698525	-0.32378	0	1.4039	1.00135	2.64426	2.28297	0.196079	0.208169	0	1.14216	1.04495	2.30927	2.53175	0.383664	0.855633
YML123C	YML123C ... PHO84 phosphate transport* inorganic phosphate transporter actintegral to plasma membrane | YML124C	-1.68465	-1.97054	0.119991	0.498452	0.450399	0.422826	0	0.483923	0.0190754	0.665762	0.27383	0.765398	0.842496	0	1.09769	0.545867	0.373788	0.565091	1.00317	0.831069
YML066C	YML066C ... SMA2 spore wall assembly (sensu Fun molecular function unknown cellular component unknown | YML067C	-2.75569	-1.38587	0.0339762	1.07543	0	-1.26793	0	-0.374392	-2.32668	0.000403	0.039044	0	-1.09538	0	0.663033	0.8803	1.98734	3.16825	-1.02822	0.569451
YPL095C	YPL095C … EEB1 biological process unknown molecular function unknown | Acyl-coenzymeA:ethanol O-acyltransferase responsible for the major part of medium-chain fatty acid ethyl ester biosynthesis during fermentation; possesses short-chain esterase activity; may be involved in lipid metabolism and detoxificationYPL096C-A	1.07695	1.1245	1.64197	2.12052	2.25701	1.98405	0	-0.688224	-0.701004	-0.213721	0.159796	0.672421	0.478527	0	-1.09786	-1.30446	-0.43768	0.26897	0.685155	0.385693
YJR047C	YJR047C ... ANB1 translational initiation translation initiation factor activribosome | YJR048W	0.41423	-0.60451	0.770942	-0.0276647	0.496963	-2.00489	0	0.210571	0.639104	0.510598	-0.461385	1.88515	2.64878	0	1.43167	1.09978	1.84984	1.54122	1.56406	-0.752478
YER011W	YER011W ... TIR1 response to stress structural constituent of cell wallcell wall (sensu Fungi) | YER012W	-0.656159	-2.17942	0.538019	1.16289	-0.740077	-0.660742	0	-1.18175	-1.53527	-1.9736	-1.44638	-0.574281	2.48958	0	-0.080233	1.28686	0.491384	0.0238577	1.20417	-0.652942
YMR120C	YMR120C ... ADE17 purine nucleotide biosynthesis IMP cyclohydrolase activity* cytosol | YMR121C	-0.554928	-0.504514	-2.72241	-2.68813	-0.522049	-1.87407	0	-0.0795151	-0.311842	0.484119	0.551392	2.55886	1.58703	0	-0.591233	-0.635381	-0.683962	-1.55126	0.593035	-0.188878
YER091C	YER091C ... MET6 methionine biosynthesis 5-methyltetrahydropteroyltriglutamacytoplasm | YER091C-A	-0.385045	-0.604966	-2.38238	-2.07848	-0.0889632	-0.0629629	0	-0.124956	-0.201306	0.0206453	0.83792	1.68062	1.72566	0	-0.0446442	-0.0623608	-0.938329	-1.14392	1.75237	2.13133
Cluster_4	#N/A	0	0	0	0	0	0	0	0	0	0	0	0	0	0	0	0	0	0	0	0
YOR381W	YOR381W ... FRE3 iron ion homeostasis* ferric-chelate reductase activity plasma membrane* | YOR381W-A	1.78704	1.31928	0.259238	1.44152	1.22112	1.59144	0	1.45082	1.42934	0.00542155	0.608978	1.96954	2.43342	0	1.24525	1.76397	-0.726354	0.345445	0.0493713	0.410649
YDR270W	YDR270W ... CCC2 intracellular copper ion trans copper-exporting ATPase activity Golgi trans face | YDR271C	0.727902	0.457959	0.440283	1.02596	0.992792	1.2394	0	0.181978	0.0640972	0.60292	0.74239	0.690483	0.944202	0	-0.302291	-0.444053	0.252141	0.177225	0.254207	0.444467
YGL253W	YGL253W ... HXK2 replicative cell aging* hexokinase activity nucleus* | YGL254W	-0.0575433	-0.209258	-0.226613	0.0409941	-0.0535036	-0.167056	0	0.0421524	0.018556	0.177702	0.372925	0.169419	0.104614	0	-0.410322	-0.714188	-0.42578	-0.362184	-0.349049	-0.452418
YML130C	YML130C ... ERO1 protein folding* electron carrier activity endoplasmic reticulum | YML131W	1.66584	1.55065	0.986379	1.48087	1.81614	1.73865	0	1.15196	1.46075	0.982035	1.04812	1.48106	1.26153	0	0.201926	0.242656	0.620684	0.929299	0.860086	1.00691
YLR126C	YLR126C ... YLR126C biological process unknown molecular function unknown cytoplasm | YLR127C	0.261583	1.12639	0.487149	1.31829	0.962626	1.33634	0	0.25507	1.36806	1.0593	1.07467	1.30019	1.53265	0	-0.608389	0.247335	-0.235051	0.386053	1.31859	0.640534
YOR226C	YOR226C ... ISU2 iron ion homeostasis* molecular function unknown mitochondrial matrix | YOR227W	1.87763	2.10598	1.07063	1.14373	1.0495	1.35972	0	2.06894	2.07756	1.03706	0.93011	1.63757	1.49391	0	0.99085	1.09978	0.806769	0.836572	1.68271	1.08489
YOL147C	YOL147C ... PEX11 peroxisome organization and bi molecular function unknown peroxisomal membrane | YOL148C	-0.33262	-0.22688	0.499054	0.39648	0.156073	-0.0672293	0	-0.640977	-0.310431	0.318933	0.295486	0.0062422	-0.0782559	0	-0.865923	-0.871561	-0.363156	-0.622154	-0.928028	-1.19408
YMR316W	YMR316W ... DIA1 pseudohyphal growth* molecular function unknown cytoplasm | YMR317W	1.3468	1.36167	0.442061	0.490466	0.703414	1.13973	0	0.993439	1.49275	0.759395	0.765668	1.2291	1.63864	0	-0.173196	0.234707	-0.0692422	0.220715	0.811156	0.908937
YJR109C	YJR109C ... CPA2 arginine biosynthesis carbamoyl-phosphate synthase (glutacarbamoyl-phosphate synthase comple | YJR110W	0.853795	0.958459	-0.489586	-0.0290519	0.471223	0.955948	0	1.00183	1.02188	1.85709	1.579	1.92292	2.08061	0	1.0354	1.62668	-1.17705	0.122853	-0.0385006	0.109038
YMR102C	YMR102C ... YMR102C biological process unknown molecular function unknown cellular component unknown | YMR103C	0.670506	0.951613	0.534261	0.646291	0.354222	0.406054	0	1.08198	1.53251	1.40126	0.966453	1.37468	1.09872	0	-0.462243	-0.153438	-0.0724238	0.250474	0.539967	0.0573209
YPL134C	YPL134C ... ODC1 mitochondrial transport intracellular transporter activity*mitochondrion* | YPL135W	0.411415	1.09652	1.26844	1.3397	1.38593	0.636725	0	0.498696	0.968481	1.18347	1.40492	1.59787	0.896208	0	0.0158614	0.16612	-0.0821996	-0.142159	1.58678	0.602617
YBR145W	YBR145W ... ADH5 alcohol metabolism alcohol dehydrogenase activity cytoplasm* | YBR146W	0.450756	0.275264	0.725026	0.656771	0.986001	1.65264	0	1.56671	1.47819	3.40344	2.44933	2.80715	2.96763	0	0.39281	-0.0736277	0.821755	0.542953	-0.584329	0.932021
YNL095C	YNL095C ... YNL095C biological process unknown molecular function unknown integral to membrane | YNL096C	0.0757055	0.124027	0.0339762	0.247724	0.123946	0.188399	0	-0.020017	-0.00475225	-0.0719107	-0.217296	0.0545356	0.180524	0	-0.11899	-0.374672	-0.765744	-0.461109	-0.343869	-0.243604
YOR375C	YOR375C ... GDH1 glutamate biosynthesis glutamate dehydrogenase (NADP+) actcytoplasm* | YOR376W	0.194569	0.47609	0.00837487	0.180715	0.592195	0.513338	0	0.765038	0.99095	0.648941	0.90321	1.30165	1.13089	0	-0.575994	-0.357015	0.206253	0.129135	0.489331	0.31594
YDR258C	YDR258C iESR cluster HSP78 response to stress* ATPase activity* mitochondrial matrix | YDR259C	1.83849	2.10372	1.44813	1.76693	0.673488	0.635945	0	1.39766	2.12395	2.06299	1.89084	1.01639	0.840375	0	-0.564975	0.0710461	0.186192	0.688193	0.534315	0.830808
YKL120W	YKL120W ... OAC1 sulfate transport* oxaloacetate carrier activity* mitochondrial inner membrane | YKL121W	1.04905	1.08555	0.0928699	0.0244048	0.793179	0.752576	0	1.51412	1.48263	0.739772	1.26183	1.74271	1.44105	0	0.552624	0.558877	0.405381	0.227067	0.925262	0.480496
YGR146C	YGR146C ... YGR146C biological process unknown molecular function unknown cellular component unknown | YGR146C-A	1.90456	1.56896	1.21635	1.19292	0.801817	1.35603	0	2.05022	1.95321	1.86367	1.76018	1.72052	2.14525	0	0.209274	-0.0652814	-0.00246291	0.297336	-0.376559	-0.194109
YDR044W	YDR044W ... HEM13 heme biosynthesis coproporphyrinogen oxidase activitymitochondrial inner membrane | YDR045C	-0.32405	-0.367568	-0.0951139	-0.48768	-0.46909	-0.611815	0	-0.437727	-0.501217	-0.501582	-0.469035	-0.0123114	0.131888	0	-0.529305	-0.948525	-0.0354768	-0.157059	-0.137758	-0.581793
YLR205C	YLR205C ... HMX1 iron ion homeostasis* heme binding* endoplasmic reticulum* | YLR206W	0.215034	0.610355	0.921032	1.93213	0.711702	0.657219	0	0.231765	0.799008	2.07451	2.25747	0.703153	1.03375	0	-1.09968	-0.187385	0.566498	1.0167	0.242135	-0.13957
YGR239C	YGR239C ... PEX21 protein-peroxisome targeting protein binding* cytosol* | YGR240C	-0.0332289	0.23945	1.36096	0.895723	1.11363	1.01705	0	0.704218	0.832976	1.76743	0.999516	1.37058	1.28822	0	-0.253769	-0.384422	0.0851886	-0.456243	0.780555	-0.329172
YFR025C	YFR025C ... HIS2 histidine biosynthesis histidinol-phosphatase activity intracellular | YFR026C	0.388302	0.196121	0.380732	0.825729	0.473311	0.490887	0	0.277284	0.586135	1.04067	1.08967	1.22457	0.966184	0	0.174826	-0.135736	0.338372	0.593553	0.821221	0.54966
YCL018W	YCL018W ... LEU2 leucine biosynthesis 3-isopropylmalate dehydrogenase actcytosol | YCL021W-A	2.08521	1.81666	-0.0288506	-0.0148573	0.770208	0.718336	0	2.57362	2.31755	1.7134	1.61944	1.91879	1.77351	0	0.954931	0.863543	0.741014	0.62418	0.497621	0.3271
YIL094C	YIL094C ... LYS12 lysine biosynthesis homoisocitrate dehydrogenase activicytoplasm* | YIL095W	-0.0509379	0.15973	1.27234	1.27292	1.26599	1.09099	0	0.0744406	0.370309	1.87122	1.53553	1.93253	1.72272	0	-0.258378	-0.351433	0.542174	0.563957	0.664538	0.103055
YNR075W	YNR075W ... COS10 endocytosis molecular function unknown cytoplasm* | YNR076W	2.15759	2.25799	1.82539	1.69558	0.518336	0.502986	0	2.11789	2.38933	1.44971	1.28416	0.35822	0.450902	0	0.635199	0.682272	0.930758	1.43326	0.116883	0.0406311
YHR044C	YHR044C ... DOG1 glucose metabolism 2-deoxyglucose-6-phosphatase activicellular component unknown | YHR045W	0.729732	0.105983	1.32348	1.54398	1.41081	1.33923	0	0.73664	0.949444	1.73737	1.03904	1.42768	1.68781	0	0.235269	-0.414795	0.590006	0.478948	1.34167	1.01765
YIL164C	YIL164C ... NIT1 biological process unknown nitrilase activity cellular component unknown | YIL165C	0.90727	1.55755	1.09811	2.42907	1.49696	2.1915	0	1.62561	1.15279	2.26889	1.91351	1.9149	2.62083	0	0.516555	0.164873	0.4348	1.78259	0.815601	1.2646
YGR204W	YGR204W ... ADE3 purine base biosynthesis* formate-tetrahydrofolate ligase actcytoplasm* | YGR205W	1.10828	1.06893	0.269767	0.307	1.09331	1.02342	0	0.922905	0.798661	0.722756	0.877566	1.29336	0.993324	0	0.116277	0.24224	-0.173913	-0.0643148	0.592817	0.785798
YLR034C	YLR034C ... SMF3 intracellular sequestering of iron ion transporter activity vacuolar membrane (sensu Fungi) | YLR035C	1.62076	1.32487	1.28506	1.56929	1.13717	1.53814	0	1.41463	1.32579	1.56597	1.04005	1.19114	1.49333	0	1.04686	0.817599	0.642884	0.388823	0.102066	0.487519
YGL012W	YGL012W ... ERG4 ergosterol biosynthesis delta24(24-1) sterol reductase actiendoplasmic reticulum | YGL013C	0.273211	-0.0264851	0.214792	0.522622	0.210821	0.172708	0	0.0067598	-0.185293	0.581226	0.363969	0.0876533	0.0554268	0	-0.47084	-0.996764	-1.12525	-1.00121	-1.07622	-0.877296
YHR029C	YHR029C … YHI9 biological process unknown molecular function unknown | Protein of unknown function; null mutant is defective in unfolded protein response; possibly involved in a membrane regulation metabolic pathway; member of the PhzF superfamily, though most likely not involved in phenazine productionYHR030C	1.02996	1.44913	1.38893	1.67877	1.4656	1.38415	0	1.15347	1.76784	2.7457	1.93852	2.28851	2.28709	0	0.397998	0.459674	0.536427	0.619811	1.32607	1.15441
YDR518W	YDR518W ... EUG1 protein folding protein disulfide isomerase activitendoplasmic reticulum | YDR519W	0.790146	0.746816	0.898375	1.45447	0.7526	0.928874	0	0.337875	0.411775	0.744962	0.841004	0.912062	1.09495	0	0.208063	0.238365	0.473855	0.644781	0.600675	0.562033
YGR213C	YGR213C ... RTA1 biological process unknown molecular function unknown integral to membrane | YGR214W	0.857837	0.791668	0.536477	-0.0620748	0.0189154	-0.320394	0	0.799375	1.30337	0.874873	1.4125	1.27217	1.00416	0	-1.38622	-1.29254	-2.27569	-1.00168	-1.35877	-2.50094
YER073W	YER073W ... ALD5 electron transport* aldehyde dehydrogenase activity mitochondrion | YER074W	0.889872	1.25093	0.149674	0.283915	1.10103	1.17867	0	0.717667	1.16218	0.218282	0.661623	1.57992	1.46924	0	-0.303078	-0.005387	-0.531746	-0.502724	0.606914	0.384948
YLR010C	YLR010C ... TEN1 telomere capping molecular function unknown nuclear telomere cap complex | YLR011W	0.790793	0.541341	1.84133	1.62797	1.11845	1.12112	0	0.859884	0.916392	1.28051	1.62401	1.64414	1.72176	0	0.479194	-0.301006	1.22438	1.44898	0.963159	0.949723
YHL035C	YHL035C ... VMR1 transport "ATPase activity, coupled to transme"mitochondrion* | YHL036W	1.39216	1.20615	0.64453	1.68393	1.3335	1.64778	0	0.607976	0.685719	0.931708	1.19984	1.12287	1.54961	0	-0.154435	0.222107	-0.495184	0.119709	0.101426	0.33579
YDL174C	YDL174C ... DLD1 aerobic respiration* D-lactate dehydrogenase (cytochromemitochondrial inner membrane | YDL175C	-0.552019	-0.706028	-0.335037	0.141183	-0.574057	-0.772522	0	0.0110566	0.225523	0.608996	0.675406	0.000143	-0.299595	0	-0.579222	-0.602958	-0.269881	0.000812	-0.243292	-0.40998
YDL124W	YDL124W iESR cluster YDL124W metabolism alpha-keto amide reductase activitycytoplasm* | YDL125C	2.52176	2.25799	1.87762	3.00258	1.64191	1.52592	0	1.64607	1.72686	1.493	1.23305	1.30239	1.35834	0	-0.191264	0.219359	-0.242526	0.192333	0.180516	0.645801
YOR152C	YOR152C iESR cluster YOR152C biological process unknown molecular function unknown membrane fraction | YOR153W	2.42128	2.035	1.93484	1.7734	0.8307	0.856618	0	2.91492	2.58318	2.5082	1.79512	1.79861	1.99625	0	1.36455	1.11043	0.869984	0.517697	0.335068	0.282569
YNL087W	YNL087W ... TCB2 biological process unknown molecular function unknown bud | YNL088W	-0.192261	-0.161821	-0.230077	-0.0100932	-0.31115	0.0395494	0	-0.18383	-0.234592	0.00612216	-0.201547	-0.284633	0.111474	0	-0.387442	-0.688774	-0.512032	-0.401849	-0.638026	-0.911191
YHR112C	YHR112C iESR cluster YHR112C sulfur metabolism cystathionine beta-lyase activity cytoplasm | YHR113W	1.32594	1.62411	0.952099	1.44078	0.912	1.19602	0	1.62956	1.94278	1.01032	1.21785	1.01901	1.31343	0	0.411767	0.555457	0.283166	0.759135	1.34167	1.51882
YPL250C	YPL250C ... ICY2 biological process unknown molecular function unknown cellular component unknown | YPL251W	1.98183	1.38672	1.07027	1.41227	0.742075	1.32129	0	1.94842	1.79434	2.5002	2.08514	1.41567	1.8756	0	0.874679	0.604313	0.30743	0.353588	0.0892831	0.793666
YJR024C	YJR024C … MDE1 biological process unknown molecular function unknown | 5'-methylthioribulose-1-phosphate dehydratase; acts in the methionine salvage pathway; potential Smt3p sumoylation substrate; expression downregulated by caspofungin and deletion mutant is caspofungin resistantYJR025C	-0.327276	-0.248974	0.0577053	0.280084	-0.0117163	-0.100224	0	-0.156563	0.171098	-0.0408539	0.039044	-0.088971	-0.0501385	0	-0.229446	-0.714943	-0.196105	-0.0682574	-0.201472	-0.336441
YBL005W	YBL005W ... PDR3 regulation of transcription fr DNA binding* cytoplasm* | YBL006C	0.562897	0.29968	0.200919	0.471357	0.0896047	0.256458	0	1.23371	0.925726	1.25087	0.788108	1.29387	1.32674	0	-0.0640351	-0.203332	-0.238631	0.0771242	-0.262317	-0.184018
YDR384C	YDR384C ... ATO3 transport* transporter activity mitochondrion* | YDR385W	0.765175	0.955279	0.730785	-0.0281274	0.434289	0.41577	0	0.119844	0.259056	-0.146371	-0.199468	-0.793758	-0.784313	0	-2.77817	-3.35842	-1.72161	-2.19236	-2.66252	-3.07065
YMR226C	YMR226C ... YMR226C metabolism "oxidoreductase activity, acting on"cytoplasm* | YMR227C	-0.0670807	0.00654063	-0.183122	0.224994	-0.0954046	-0.257535	0	-0.321777	0.104253	-0.323294	-0.088181	-0.11239	-0.303169	0	-0.573697	-0.484794	-0.444293	-0.212654	0.0172782	-0.3116
YMR035W	YMR035W ... IMP2 mitochondrial protein processi peptidase activity* mitochondrial inner membrane peptid | YMR036C	0.306847	0.39549	0.838252	0.794528	0.861959	0.588709	0	0.650951	1.10145	0.911594	1.15623	1.22013	1.3025	0	-0.0323383	-0.485185	0.261102	0.515114	0.619204	0.556394
YLR099C	YLR099C ... ICT1 biological process unknown molecular function unknown cellular component unknown | YLR099W-A	2.16127	2.05952	0.942828	0.648008	0.0695414	0.34798	0	2.55855	2.76009	1.21224	1.19054	1.32085	1.01467	0	0.119954	0.125097	-0.763182	-0.617228	0.10793	-0.0451371
YPR119W	YPR119W ... CLB2 G2/M transition of mitotic cel cyclin-dependent protein kinase regcytoplasm* | YPR120C	-0.218241	0.206828	-0.427065	-0.0941955	-0.351866	0.115988	0	-0.423161	-0.344239	-0.156533	-1.00618	-0.0901171	-0.275513	0	-0.442803	-0.594393	-0.603352	-0.283849	-0.091497	-0.39007
YPR145W	YPR145W PAC cluster ASN1 asparagine biosynthesis asparagine synthase (glutamine-hydrcytoplasm | YPR146C	0.321821	0.676653	-0.0609025	0.288292	0.485943	0.569688	0	0.685662	1.07449	0.943471	0.894756	1.3835	1.35399	0	-0.0909106	0.174142	-0.358799	-0.0717758	0.466671	0.222688
YOR153W	YOR153W ... PDR5 response to drug* xenobiotic-transporting ATPase actimitochondrion* | YOR154W	1.66576	1.37514	0.955908	0.526907	0.31065	0.608936	0	2.17944	1.84415	1.73204	0.980832	1.37093	1.55365	0	-0.159521	-0.464378	-0.597224	-1.03061	-0.596285	-0.395842
YDL128W	YDL128W ... VCX1 calcium ion homeostasis* calcium ion transporter activity* vacuole (sensu Fungi)* | YDL129W	0.490368	0.0285166	-0.185317	0.0241167	0.0107072	0.0389029	0	-0.122464	-0.415745	-0.448265	-0.656902	-0.362777	-0.226672	0	-0.565119	-1.15598	-0.61838	-0.703468	-0.932729	-0.787484
YGR121C	YGR121C ... MEP1 ammonium transport ammonium transporter activity plasma membrane | YGR121W-A	0.199548	0.634678	-0.434978	-0.482973	0.275639	0.418915	0	0.505717	0.711969	-0.0274756	-0.0723773	0.278384	0.347968	0	-1.55365	-1.1642	-1.07616	-1.48321	-1.38465	-0.631597
YGR161C	YGR161C iESR cluster RTS3 protein amino acid dephosphory protein phosphatase type 2A activitcytoplasm* | YGR161W-C	2.33078	2.52102	1.14399	1.20028	1.23027	1.09291	0	2.24046	2.36384	1.02774	1.49922	1.55291	1.40039	0	0.582143	0.767934	-0.224578	0.443606	-0.397326	-0.0683639
YNL231C	YNL231C ... PDR16 response to drug* phosphatidylinositol transporter accytoplasm* | YNL232W	0.504137	1.15727	1.22325	1.35426	0.781243	0.863863	0	0.797877	1.64946	1.72998	1.47205	1.54725	1.40343	0	-0.439608	0.0307145	0.447497	0.489725	1.13963	0.337579
YGL194C-A	YGL194C-A YGL194C-A YKL023C-A	1.08707	0.636498	0.618939	0.688406	1.89182	1.26813	0	1.40947	0.902138	0.547891	0.679502	2.22302	1.47022	0	0.281563	-0.467263	0.810464	0.402713	1.07864	0.607418
YMR202W	YMR202W ... ERG2 ergosterol biosynthesis C-8 sterol isomerase activity endoplasmic reticulum | YMR203W	0.336505	0.133095	0.257632	0.644349	-0.319506	-0.301904	0	0.308322	0.20413	0.565109	0.333813	0.0659672	-0.0398548	0	-0.0639571	-0.563451	-0.0209972	-0.211299	-0.712458	-0.517666
YGL179C	YGL179C ... TOS3 glucose metabolism protein kinase activity cytoplasm* | YGL180W	0.829268	0.799997	1.7014	2.15267	1.08193	1.355	0	0.718718	0.966101	0.971834	1.61436	2.02811	2.11874	0	0.194627	0.133994	0.600318	1.32025	1.02973	1.14799
YJR104C	YJR104C iESR cluster SOD1 zinc ion homeostasis* "copper, zinc superoxide dismutase a"cytosol* | YJR105W	-0.259626	-0.307149	-0.309876	-0.300219	-0.169412	-0.264631	0	0.0156709	-0.00163628	-0.326708	-0.104071	-0.263064	-0.419234	0	-0.699234	-1.07476	-0.327836	-0.465617	-0.428528	-0.519869
YHL040C	YHL040C ... ARN1 iron-siderophore transport siderophore-iron transporter activiendosome* | YHL041W	1.71234	1.44497	0.977143	1.81542	1.97284	2.31949	0	0.903179	0.780369	0.624745	0.480239	1.36866	1.71369	0	0.167502	0.331075	-0.286673	0.060867	0.668405	0.830106
YBR208C	YBR208C ... DUR1,2 allantoin catabolism* allophanate hydrolase activity* cytoplasm | YBR209W	1.8363	2.13329	0.381395	0.646341	0.732179	0.841463	0	1.8804	1.90751	1.90475	1.0988	0.66487	1.18393	0	0.126409	0.212945	-0.966767	-1.42905	-0.426309	-0.244662
YGL117W	YGL117W ... YGL117W biological process unknown molecular function unknown cellular component unknown | YGL118C	1.47312	1.32838	1.0941	1.37862	1.36451	0.932372	0	1.4122	1.87789	3.27554	2.72147	2.65959	2.07795	0	1.20105	1.02578	0.160673	0.716552	1.09374	0.787451
YPR128C	YPR128C ... ANT1 peroxisome organization and bi adenine nucleotide transporter acticytoplasm* | YPR129W	-0.14964	0.0162287	0.201863	0.247773	0.171644	0.135582	0	-0.3288	-0.0945069	0.116082	0.039044	0.21653	0.0228248	0	-0.881404	-0.914028	-0.646892	-0.658119	-0.427255	-0.615164
YJR148W	YJR148W ... BAT2 branched chain family amino ac branched-chain-amino-acid transamincytoplasm* | YJR149W	1.16802	1.42836	1.46314	2.04166	1.67531	1.95223	0	0.85191	1.11813	0.447676	0.955446	0.45264	0.660192	0	-0.0921478	-0.00120997	-0.679836	-0.0742396	0.153211	0.0344762
YEL065W	YEL065W ... SIT1 iron ion homeostasis* siderophore-iron (ferrioxamine) uptendosome* | YEL066W	0.33422	0.173342	-0.380826	0.577333	0.287711	0.858096	0	-0.894938	-0.687668	-0.0336672	-0.253036	0.127426	0.575156	0	-3.30167	-2.58702	-1.3013	-1.14864	-1.3557	-0.971554
YBR104W	YBR104W ... YMC2 transport transporter activity mitochondrial inner membrane | YBR105C	0.173357	0.467505	1.18276	0.988218	1.0337	0.868598	0	0.012684	0.260301	1.08382	0.347476	0.764034	0.563727	0	-0.520806	-0.716089	0.0948698	-0.0097597	0.303342	-0.372862
YOR246C	YOR246C ... YOR246C biological process unknown oxidoreductase activity lipid particle | YOR247W	-0.514068	-0.206236	-0.329701	-0.24364	-0.31256	-0.311447	0	0.00764989	0.132026	-0.0874225	0.00929664	0.183492	-0.0603928	0	-0.219754	-0.279053	-0.320136	-0.190122	-0.0719238	-0.225839
YCR061W	YCR061W iESR cluster YCR061W biological process unknown molecular function unknown cytoplasm | YCR063W	2.48339	2.03519	2.54557	1.74605	1.97809	1.50481	0	2.32743	1.68552	2.37892	1.3115	1.21132	0.291643	0	0.111786	0.124679	0.687781	0.0487624	-0.644255	0.0529291
YJL082W	YJL082W ... IML2 biological process unknown molecular function unknown cytoplasm* | YJL083W	1.32258	1.28633	0.964511	1.38334	0.540684	0.620391	0	1.172	1.21543	1.24274	1.38859	1.05508	0.944764	0	0.0893076	-0.0821875	-0.536067	-0.0872978	0.042679	0.0636899
YEL071W	YEL071W ... DLD3 lactate metabolism D-lactate dehydrogenase (cytochromecytoplasm* | YEL072W	1.23991	1.02529	0.920835	1.62628	1.6288	1.68139	0	1.77455	1.87108	1.43515	1.80942	1.89907	2.07387	0	0.533009	0.113147	0.554245	1.15617	0.687349	0.702066
YNL142W	YNL142W ... MEP2 pseudohyphal growth* ammonium transporter activity plasma membrane | YNL143C	1.08384	1.23645	0.531476	0.901399	1.57096	1.2132	0	1.17469	1.20614	0.770922	0.877293	1.63722	1.77909	0	0.666821	0.465906	0.562843	0.363319	0.638063	1.04338
YJR009C	YJR009C ... TDH2 glycolysis* glyceraldehyde-3-phosphate dehydrogcytoplasm* | YJR010C-A	1.04291	0.781786	1.06148	0.879308	1.19628	1.15761	0	1.48714	1.38955	1.633	1.12977	1.31142	1.10968	0	0.930519	0.794339	1.38788	1.14541	0.320211	0.587238
YIL120W	YIL120W iESR cluster QDR1 multidrug transport multidrug transporter activity* plasma membrane* | YIL121W	1.26082	1.69999	1.10926	1.54936	1.95639	1.91428	0	1.35496	1.91838	1.19305	1.58794	0.972613	1.01154	0	0.428211	0.604518	0.823843	1.19763	0.844171	0.74348
YIR031C	YIR031C ... DAL7 allantoin catabolism malate synthase activity cytoplasm | YIR032C	0.716793	0.528181	0.614823	0.778228	0.531728	1.55024	0	0.555399	0.78714	1.19613	1.34864	1.56102	2.18547	0	0.0296847	0.171192	0.0999702	0.428627	0.127076	1.04642
YMR016C	YMR016C ... SOK2 pseudohyphal growth transcription factor activity nucleus | YMR017W	-0.0773359	-0.201751	-0.148281	0.155451	-0.109295	-0.0908504	0	-0.307946	-0.169719	-0.166017	0.0554074	-0.312789	-0.15869	0	-0.806686	-0.370084	-0.335289	0.0415527	-0.0552786	-0.452218
YCL026C-B	YCL026C-B ... HBN1 biological process unknown molecular function unknown cytoplasm* | Putative protein of unknown function; similar to bacterial nitroreductases; green fluorescent protein (GFP)-fusion protein localizes to the cytoplasm and nucleus; protein becomes insoluble upon intracellular iron depletionYCL027W	1.21629	0.904349	0.917652	1.49047	1.66491	1.23347	0	1.31749	1.35433	1.53014	1.65572	1.43404	1.08492	0	0.584678	0.61184	1.21263	1.52606	1.45578	1.47925
YGL166W	YGL166W ... CUP2 transcription initiation from ligand-regulated transcription factnucleus | YGL167C	1.10427	1.07512	0.706402	0.497069	1.33154	1.15976	0	1.06497	0.860318	1.12969	0.400143	0.95554	1.04027	0	0.0218652	0.494057	0.362381	-0.0419412	1.29276	0.845968
YHR018C	YHR018C ... ARG4 arginine biosynthesis argininosuccinate lyase activity cytosol | YHR019C	0.402679	0.506946	0.0986389	0.348195	0.222555	0.519287	0	0.424458	0.612528	2.0283	1.59752	1.70247	1.40318	0	0.116624	0.0628928	-0.892854	-0.635044	0.178394	0.00863411
YNR060W	YNR060W ... FRE4 iron-siderophore transport ferric-chelate reductase activity plasma membrane | YNR061C	1.20049	1.05897	-0.0476912	0.383902	-0.844126	-0.319316	0	0.396396	0.795058	0.544241	0.70393	0.355348	0.889983	0	-2.95288	-2.99757	-1.07127	-2.03867	-1.78238	-2.33841
YGR260W	YGR260W ... TNA1 nicotinamide mononucleotide tr nicotinamide mononucleotide permeasmitochondrion* | YGR261C	-0.368034	-0.517508	0.517419	0.382456	0.0506054	0.223802	0	0.284571	-0.077974	0.673152	0.449773	-0.112254	0.0819286	0	0.0823615	-0.430679	-0.167267	-0.196214	-0.606729	-0.519362
YLR136C	YLR136C ... TIS11 mRNA catabolism* mRNA binding cytoplasm* | YLR137W	2.14047	2.24311	0.412488	2.18465	1.82954	2.22159	0	1.31366	1.8494	0.861168	1.82301	2.2353	3.01273	0	-0.175323	0.107157	-0.616499	-0.228855	0.287223	0.253878
YPL111W	YPL111W ... CAR1 arginine catabolism to ornithi arginase activity cytosol | YPL112C	1.73923	1.75801	1.62968	1.56971	1.89247	1.7077	0	1.90888	2.1843	2.10568	2.07083	2.02911	1.80919	0	0.668279	0.833489	0.0991623	0.163478	0.361522	0.268146
YOR378W	YOR378W ... YOR378W biological process unknown molecular function unknown cellular component unknown | YOR379C	2.03643	2.04757	0.551825	1.25985	1.70642	1.03041	0	2.25239	2.52774	2.07235	2.04993	1.49986	1.45005	0	-0.0384128	0.39676	1.0825	1.65437	1.84417	2.02296
YIL165C	YIL165C ... YIL165C biological process unknown molecular function unknown cellular component unknown | YIL166C	1.01689	0.331987	1.03398	2.02963	1.38593	1.83161	0	0.806181	0.74732	1.70084	2.08344	2.30019	2.43711	0	-0.220411	-0.885115	-0.0126587	1.08579	0.674246	1.2646
YLR432W	YLR432W PAC cluster IMD3 GTP biosynthesis IMP dehydrogenase activity cytoplasm | YLR433C	-0.224789	-0.286488	-0.377771	-0.24227	-0.528516	-0.449508	0	0.050146	0.0560335	0.0143348	0.0524778	0.224338	0.155333	0	-0.282403	-0.630442	-0.960368	-0.762482	-0.547961	-0.80764
YHL039W	YHL039W PAC cluster YHL039W biological process unknown molecular function unknown cytoplasm | YHL040C	-0.294069	-0.295267	-0.00780725	0.519619	-0.363209	0.0691083	0	-0.342462	-0.323943	-0.482779	-0.22452	-0.241483	-0.173383	0	-0.30935	-0.322861	-0.59887	-0.289273	-0.108363	-0.5183
YDR345C	YDR345C ... HXT3 hexose transport glucose transporter activity* plasma membrane | YDR346C	0.914087	0.683715	1.26049	0.879654	1.43174	1.24414	0	1.37301	1.17071	1.92268	1.00316	1.70584	1.55498	0	-0.396304	-0.784345	0.0620878	-0.303107	0.254633	-0.154088
YLR328W	YLR328W ... NMA1 NAD metabolism nicotinamide-nucleotide adenylyltracytoplasm* | YLR329W	-0.229055	0.0694087	-0.421703	0.230254	-0.0952496	0.00581073	0	-0.647982	-0.32241	-0.726578	0.094463	-0.147764	-0.17528	0	-0.979428	-1.11239	-1.1537	-0.74201	-0.432326	-0.773483
YCR053W	YCR053W PAC cluster THR4 endocytosis* threonine synthase activity cytoplasm* | YCR054C	-0.0723755	-0.0478445	-0.329873	-0.0243607	-0.136268	-0.11436	0	-0.192126	-0.553252	0.0511924	0.0955202	0.0202424	0.0225801	0	-0.0633854	-0.248354	-0.522093	-0.272446	-0.285031	-0.24275
YNR074C	YNR074C ... AIF1 response to singlet oxygen* "oxidoreductase activity, acting on"nucleus* | YNR075C-A	0.748614	0.932578	0.597184	0.473306	1.04379	1.02523	0	0.789986	0.923989	0.864665	0.857497	1.38396	1.19018	0	0.163533	0.0752357	0.582085	0.728448	0.971914	0.697731
YNR068C	YNR068C ... YNR068C biological process unknown molecular function unknown cellular component unknown | YNR069C	1.85675	2.00645	1.29032	1.72179	0.742075	1.689	0	2.13072	2.13275	2.41544	2.57076	1.75962	2.24342	0	0.104685	0.156361	0.0653438	0.332742	1.34167	1.62495
YDL131W	YDL131W ... LYS21 lysine biosynthesis, aminoadip homocitrate synthase activity nucleus | YDL132W	0.117435	0.30364	0.511981	0.835587	0.987333	0.991528	0	-0.106458	0.108174	1.17348	1.23222	1.12534	1.20439	0	-0.361705	-0.408356	-0.494412	-0.056893	0.220255	-0.195191
YOL059W	YOL059W ... GPD2 glycerol metabolism glycerol-3-phosphate dehydrogenase mitochondrion* | YOL060C	0.514937	0.532198	0.43209	0.504004	0.295265	0.498918	0	0.240954	0.0787448	0.543762	0.543841	0.0402926	0.0126129	0	-1.87711	-1.88301	-1.25855	-1.06074	-1.47748	-1.45106
YNR069C	YNR069C ... BSC5 biological process unknown molecular function unknown cellular component unknown | YNR070W	2.14066	1.69505	1.26747	2.09173	0.4145	1.19985	0	1.94649	2.0696	2.2908	2.60752	1.10754	1.68095	0	-0.224163	-0.167702	0.36285	0.878741	0.301028	0.28788
YKR098C	YKR098C ... UBP11 biological process unknown ubiquitin-specific protease activitcellular component unknown | YKR099W	0.750196	0.930035	0.705816	1.29929	0.677535	0.943128	0	0.560691	0.564091	1.56869	1.32761	1.26366	1.21862	0	0.192564	0.493011	0.164984	0.643827	0.624604	0.646413
YIR018W	YIR018W ... YAP5 positive regulation of transcr RNA polymerase II transcription facnucleus | YIR019C	0.705088	1.05536	0.419266	0.54705	0.867146	0.633893	0	0.748161	1.42267	1.03675	0.538146	1.15308	1.40712	0	-0.135825	0.129322	0.19281	-0.186102	1.01236	0.80265
YNR067C	YNR067C ... DSE4 cytokinesis, completion of sep "glucan 1,3-beta-glucosidase activit"cell wall (sensu Fungi)* | YNR068C	0.31687	0.0434323	-0.301861	-0.291029	-0.125568	0.201372	0	0.264187	-0.0943895	-0.375162	0.147969	-0.323991	0.273043	0	-0.0932776	-0.354223	-0.478248	-0.952142	-0.842949	-0.670644
YOR137C	YOR137C ... SIA1 proton transport molecular function unknown cellular component unknown | YOR138C	1.44702	1.62056	1.08322	1.52742	1.15844	1.19252	0	0.838017	0.711455	1.09727	0.57791	1.14346	1.00192	0	0.515133	0.625847	0.650306	0.636724	0.742494	0.543116
YOL126C	YOL126C ... MDH2 gluconeogenesis* L-malate dehydrogenase activity cytoplasm* | YOL127W	0.824666	1.00645	0.542862	0.343783	-0.600112	-0.176238	0	0.223379	-0.00475225	-0.15423	-0.683777	-1.09771	-0.91414	0	-2.15246	-2.22215	-1.87301	-1.89883	-2.66025	-2.39933
YHR162W	YHR162W ... YHR162W biological process unknown molecular function unknown mitochondrion | YHR163W	1.05895	1.22436	0.922501	1.09349	1.02005	1.06941	0	1.19125	1.25268	1.20792	1.04008	1.07247	1.11385	0	0.381034	0.100533	0.444305	0.621887	0.519507	0.336529
YNL259C	YNL259C ... ATX1 response to oxidative stress* copper chaperone activity cytosol | YNL260C	0.376755	0.657342	0.985662	0.489164	0.547236	0.592306	0	0.617046	1.00011	1.04715	0.670136	0.995897	1.29046	0	-0.521754	-0.500866	0.181066	-0.251233	0.459507	0.279013
YML075C	YML075C ... HMG1 ergosterol biosynthesis hydroxymethylglutaryl-CoA reductaseendoplasmic reticulum membrane* | YML076C	0.195878	-0.0749743	0.00845232	0.00036	-0.403721	-0.233292	0	0.0353399	-0.277343	0.413087	0.148213	-0.262654	-0.228564	0	-0.540189	-0.770721	-0.213571	-0.576936	-0.864741	-0.754816
YHR100C	YHR100C … GEP4 biological process unknown molecular function unknown | Protein of unknown function required for respiratory growth; detected in highly purified mitochondria in high-throughput studies; null mutation confers sensitivity to tunicamycin and DTT and decreased levels of phosphatidylethanolYHR101C	-0.668691	-0.195647	-0.0149334	0.139244	-0.362757	-0.107769	0	-1.15089	-0.258136	-0.224663	0.0889199	-0.420195	0.0169486	0	-0.419596	-0.522456	-0.334587	0.0199095	-0.218489	-0.480063
YOR192C	YOR192C … THI72 transport transporter activity | Transporter of thiamine or related compound; shares sequence similarity with Thi7pYOR192C-C	1.96882	1.48038	1.43607	0.695157	0.805085	2.44828	0	1.54685	1.23471	1.09994	0.514382	1.72165	2.34519	0	1.01663	1.05087	1.03797	0.395658	1.03682	2.2646
YIL167W	YIL167W	0.829268	2.84295	0.519403	1.60594	2.03753	2.35451	0	1.05857	2.8026	1.37892	1.82332	1.44809	1.64538	0	-0.120875	0.77785	1.47277	0.91586	1.17992	1.22841
YIL116W	YIL116W ... HIS5 histidine biosynthesis histidinol-phosphate transaminase aintracellular | YIL117C	0.52523	0.464878	-0.762893	-0.222144	-0.734363	-0.867515	0	0.178379	0.310553	0.47265	0.576701	0.329935	0.0915369	0	-0.238206	-0.49735	-0.738189	-0.42999	-0.393318	-0.423637
YOR013W	YOR013W … IRC11 | Dubious opening reading frame unlikely to encode a protein, based on available experimental and comparative sequence data; partially overlaps the uncharacterized gene YOR012C; null mutant displays increased levels of spontaneous Rad52 fociYOR014W	1.44942	1.18604	2.2039	2.11496	1.73982	1.64156	0	1.17815	0.739991	1.24833	1.11705	1.49396	1.05272	0	0.635199	-0.109676	1.0748	0.735288	1.24213	0.841124
Q0070	Q0070 ... AI5_ALPHA movement of group I intron endonuclease activity mitochondrion | Q0075	0.557188	1.45962	0	0	0.966448	1.27264	0	0.412205	0.639104	0	0	1.61098	1.60169	0	-0.742363	0.0257773	0	0	1.41382	0.798075
YIR033W	YIR033W ... MGA2 positive regulation of transcr transcriptional activator activity endoplasmic reticulum membrane | YIR034C	1.97827	2.33009	1.1205	1.37492	1.12612	1.63856	0	1.51487	1.98507	0.736837	0.463141	0.989487	1.11358	0	-0.0839584	0.427465	-0.313448	0.363667	1.40517	0.698331
Cluster_5	#N/A	0	0	0	0	0	0	0	0	0	0	0	0	0	0	0	0	0	0	0	0
YBR147W	YBR147W … RTC2 biological process unknown molecular function unknown | Protein of unknown function; identified in a screen for mutants with decreased levels of rDNA transcription; detected in highly purified mitochondria; null mutant suppresses cdc13-1; similar to a G-protein coupled receptor from S. pombeYBR148W	-0.433767	1.67302	1.03398	0.245354	1.71936	1.86958	0	1.00412	1.73221	4.58537	1.49848	3.01443	2.79215	0	2.10152	2.94777	2.15727	0.805678	2.40056	3.27727
YBR047W	YBR047W ... FMP23 biological process unknown molecular function unknown mitochondrion | YBR048W	2.67362	2.59141	3.98081	4.06695	4.53927	4.75814	0	2.15713	2.09958	4.14908	2.90323	3.55353	3.94901	0	0.490083	0.156361	1.06134	1.24625	1.99375	2.18089
YOR382W	YOR382W ... FIT2 siderophore transport molecular function unknown cell wall (sensu Fungi) | YOR383C	2.68725	2.74341	2.89126	3.58464	4.95735	4.95243	0	2.07847	2.78184	2.53569	2.06207	5.18453	5.12274	0	0.415178	0.362812	-0.287894	-0.0682902	1.114	1.79924
YIL014C-A	YIL014C-A ... YIL014C-A biological process unknown molecular function unknown cellular component unknown | YIL014W	1.99919	2.15845	2.3559	2.28842	2.57497	4.054	0	3.05857	3.39214	3.34025	3.07147	4.34458	6.0339	0	3.78602	3.3139	4.11662	3.7773	4.67954	5.7789
YCR005C	YCR005C ... CIT2 glutamate biosynthesis* citrate (Si)-synthase activity mitochondrion* | YCR006C	2.41286	2.05613	2.29288	3.02997	2.85686	2.77469	0	2.51402	2.43896	2.56829	2.58553	2.59481	2.89808	0	1.10619	1.05267	2.19939	2.87968	1.10248	0.712285
YOR100C	YOR100C ... CRC1 fatty acid metabolism carnitine:acyl carnitine antiportermitochondrion* | YOR101W	2.33177	2.45962	0.765196	3.07543	1.64897	3.73207	0	3.11104	2.94944	1.25518	4.49848	1.75962	3.60506	0	3.22016	3.1354	2.07611	5.12761	2.69531	3.89138
YNL117W	YNL117W ... MLS1 glyoxylate cycle malate synthase activity cytoplasm* | YNL118C	0.128828	0.0880614	3.2039	2.29782	3.81889	3.48696	0	0.275666	-0.589715	0.585366	2.03904	2.47011	2.36405	0	0.500613	1.19289	1.98734	2.41336	2.75671	2.79184
YOR383C	YOR383C ... FIT3 siderophore transport molecular function unknown cell wall (sensu Fungi) | YOR384W	3.12657	2.83088	1.55241	1.44566	4.33826	3.61814	0	2.17916	2.37607	1.58527	1.19605	4.23614	3.18352	0	1.12729	1.46901	-0.272696	-0.383534	1.5184	2.64645
YJL133C-A	YJL133C-A ... YJL133C-A biological process unknown molecular function unknown cellular component unknown | YJL133W	2.37426	1.28398	2.61894	2.96851	2.54695	2.58293	0	2.78127	1.95085	2.55421	2.56261	2.15049	1.94693	0	0.298885	-0.566105	1.3313	1.6667	-0.358769	0.37353
YPL058C	YPL058C ... PDR12 transport* xenobiotic-transporting ATPase actiplasma membrane | YPL059W	2.79721	2.85251	3.42821	3.12234	5.27895	5.71289	0	-0.502548	-0.599938	0.302169	0.0770297	-1.78727	-1.09411	0	-0.582337	-0.527304	-1.25572	-2.07355	-1.42234	-0.657058
YJL077W-A	YJL077W-A … Dubious Dubious open reading frame unlikely to encode a protein, based on available experimental and comparative sequence data; completely overlaps the verified gene YJL077C/ICS3YJL113W	1.82927	2.39549	0.557538	1.01403	1.39743	2.84755	0	1.47361	-1.00475	0.170328	0.624006	-0.11485	2.31966	0	2.5572	1.5852	-0.312219	0.583285	1.34167	2.85896
YFL056C	YFL056C ... AAD6 aldehyde metabolism aryl-alcohol dehydrogenase activitycellular component unknown | YFL057C	5.30402	4.89523	1.06199	1.8878	2.31055	2.2746	0	4.30395	4.26382	0.556797	1.15723	2.11222	2.18841	0	3.05098	2.39396	-0.161522	0.810696	1.6192	1.34357
YLR348C	YLR348C ... DIC1 dicarboxylic acid transport dicarboxylic acid transporter activmitochondrial membrane | YLR349W	2.85081	3.36281	1.87986	1.74332	2.63189	2.6314	0	3.3322	3.66151	1.64244	2.40646	2.72102	2.71702	0	2.94058	3.69585	2.22162	2.4842	3.04211	2.91569
YGL184C	YGL184C ... STR3 methionine biosynthesis cystathionine beta-lyase activity peroxisome | YGL185C	-0.461964	-0.606469	0.449014	-1.50953	1.13439	0.995108	0	0.956814	1.69734	2.5029	1.8464	4.87004	4.63797	0	0.0733206	0.861508	2.10282	-0.264712	3.69531	4.29192
YOL101C	YOL101C ... IZH4 lipid metabolism* metal ion binding integral to membrane* | YOL102C	4.68155	5.24545	4.3286	3.42907	2.78647	3.08963	0	4.66098	5.07617	2.03015	0.702009	3.15817	2.21621	0	1.44472	1.4868	0.489842	0.0763252	2.11034	0.462535
YBR148W	YBR148W ... YSW1 biological process unknown molecular function unknown cellular component unknown | YBR149W	-0.871172	1.15845	0.297011	1.88278	1.49696	2.84755	0	0.275666	2.65821	2.37892	2.99324	4.40871	4.07454	0	-0.683811	1.36281	1.25038	2.45775	4.56406	3.04338
YFL057C	YFL057C ... AAD16 aldehyde metabolism aryl-alcohol dehydrogenase activitycellular component unknown | YFL058W	4.48462	4.10598	1.44901	0.905504	2.81889	1.98	0	3.54399	3.7286	1.11588	0.77601	2.34458	1.99208	0	2.67821	1.77785	0.572304	0.828398	1.92663	1.68493
YPR036W-A	YPR036W-A ... YPR036W-A response to drug molecular function unknown cellular component unknown | YPR037C	3.32991	3.05862	2.75934	3.2657	2.39804	2.65577	0	3.40593	3.08914	3.14022	2.92202	2.87818	3.17632	0	2.66047	2.58386	1.51465	2.35411	1.03782	1.16618
YHL047C	YHL047C ... ARN2 iron ion homeostasis* siderophore-iron transporter activiplasma membrane* | YHL048C-A	0	3.9493	0.871744	1.97763	1.60967	1.85654	0	0	3.9493	1.53502	1.29915	2.03296	2.44798	0	0	0.77785	-2.19936	-1.37587	-0.638512	-0.254833
YBR067C	YBR067C ... TIP1 cell wall organization and bio structural constituent of cell wallcell wall (sensu Fungi) | YBR068C	6.69488	6.3296	2.42844	0.887496	2.96511	2.58497	0	5.87995	5.50756	-0.829672	-0.0518645	1.67175	0.844499	0	3.25764	2.75185	1.04262	1.32245	2.44601	2.5246
YML118W	YML118W ... NGL3 biological process unknown endonuclease activity cellular component unknown | YML119W	1.52971	2.31457	-1.55099	1.07543	3.49696	0.562148	0	1.62561	2.84324	2.0004	3.8464	3.97261	2.09225	0	1.3985	2.62585	2.20973	4.80568	4.21614	1.94385
YBR046C	YBR046C ... ZTA1 biological process unknown molecular function unknown cytoplasm* | YBR047W	1.64453	1.81987	3.20082	3.5384	3.40257	3.31496	0	0.758059	1.14209	2.67065	2.15602	2.13611	1.51424	0	0.395916	0.472995	0.331296	0.800097	1.37964	1.00915
YBR013C	YBR013C ... YBR013C biological process unknown molecular function unknown cellular component unknown | YBR014C	0.829268	1.67302	4.84133	1.8597	1.09963	1.30193	0	1.23103	1.55324	5.12969	2.03904	1.44315	1.41241	0	0.959295	0.893327	4.5723	2.07633	1.17175	1.21331
YNR002C	YNR002C … iESR cluster ATO2 transport* transporter activity mitochondrion* | Putative transmembrane protein involved in export of ammonia, a starvation signal that promotes cell death in aging colonies; phosphorylated in mitochondria; member of the TC 9.B.33 YaaH family; homolog of Ady2p and Y. lipolytica Gpr1pYNR003C	0.343841	2.59902	5.07837	5.61846	6.06175	6.054	0	0.0812878	0.410285	-0.459028	0.739484	0.88515	2.22655	0	0.557197	1.00024	-0.150162	0.805678	1.17175	3.30642
YJR095W	YJR095W ... SFC1 fumarate transport* succinate:fumarate antiporter activmitochondrial inner membrane | YJR096W	3.11467	5.10598	4.07837	3.7077	0.233928	0.317036	0	2.696	4.31718	2.32233	1.52447	-1.11485	-2.09538	0	0.142159	3.86531	1.7947	1.92432	0.564063	0.306416
YLR346C	YLR346C ... YLR346C biological process unknown molecular function unknown mitochondrion | YLR347C	2.69277	3.38084	5.12144	4.50169	1.912	1.16503	0	2.94754	4.45468	5.88305	4.5309	2.62212	1.75262	0	-0.2908	-0.0701472	4.5109	3.80568	3.02973	1.41745
YER142C	YER142C iESR cluster MAG1 DNA dealkylation alkylbase DNA N-glycosylase activitnucleus | YER143W	2.57469	2.87466	3.2039	2.85072	3.27457	2.78736	0	2.30897	3.52576	3.77801	3.10679	3.24772	2.99208	0	1.44701	1.81738	3.28851	3.06607	3.21614	3.40234
YHR137W	YHR137W iESR cluster ARO9 aromatic amino acid family met aromatic-amino-acid transaminase accytoplasm* | YHR138C	3.08378	3.80875	2.55481	2.3685	2.53927	2.71123	0	0.824512	1.52726	-0.715804	-0.449242	0.537227	0.939667	0	4.88382	5.26797	2.35252	2.64161	3.23244	4.05093
YML122C	YML122C ... | YML123C	1.82927	1.25799	1.90845	2.39736	3.81889	4.73207	0	1.47361	2.45468	-0.584559	0.039044	1.69251	3.71197	0	-0.0277655	1.77785	0.209734	-1.58664	0.756708	2.30642
YOR049C	YOR049C ... RSB1 fatty acid transport* phospholipid-translocating ATPase aendoplasmic reticulum* | YOR050C	2.61063	2.08856	4.44901	3.66039	1.02008	1.09916	0	3.40379	2.94075	8.07544	6.54684	2.23556	2.08155	0	1.51679	0.915353	2.7947	2.73529	-0.187715	0.0447108
Cluster_6	#N/A	0	0	0	0	0	0	0	0	0	0	0	0	0	0	0	0	0	0	0	0
YKL084W	YKL084W ... HOT13 mitochondrial intermembrane sp molecular function unknown mitochondrial intermembrane space | YKL085W	0.498794	0.513116	0.488091	0.989529	0.363874	0.539428	0	0.300837	0.715562	0.610169	0.659698	0.764135	1.16873	0	-0.281741	-0.795336	-0.679103	-0.402883	-0.958315	-0.430549
YLR046C	YLR046C ... YLR046C biological process unknown molecular function unknown integral to membrane | YLR047C	0.943483	0.65412	0.346361	1.00914	-0.415687	0.0522516	0	0.653213	0.483112	0.69718	0.597854	-0.399893	0.119498	0	0.257637	0.325338	-0.180603	0.192047	-0.71499	-0.187077
YDR367W	YDR367W ... YDR367W biological process unknown molecular function unknown cytoplasm* | YDR368W	0.500826	0.489472	0.357221	0.4959	0.35245	0.387305	0	0.357261	0.301245	-0.130527	0.0244528	0.246166	0.16261	0	-0.0733177	-0.662209	0.0112961	-0.0571725	-0.364803	-0.260233
YGL209W	YGL209W ... MIG2 regulation of transcription fr specific RNA polymerase II transcrinucleus | YGL210W	0.267389	0.697374	0.157551	0.582987	1.02192	0.457753	0	-0.0284643	0.417939	0.17683	0.655949	0.920774	0.356652	0	-0.660034	-0.454811	-0.815622	-0.209786	-0.26754	-0.367415
YJL171C	YJL171C ... YJL171C biological process unknown molecular function unknown mitochondrion* | YJL172W	1.04405	0.719247	0.0611977	0.0240419	-0.04777	0.0413035	0	0.688213	0.504885	0.245714	-0.000945	-0.19753	-0.18354	0	0.499872	-0.00365741	-0.089722	-0.303241	-0.526494	-0.283388
YMR041C	YMR041C … iESR cluster ARA2 biological process unknown molecular function unknown | NAD-dependent arabinose dehydrogenase, involved in biosynthesis of dehydro-D-arabinono-1,4-lactone; similar to plant L-galactose dehydrogenaseYMR042W	1.35884	1.29595	0.263982	0.942791	0.0582209	-0.315861	0	0.4925	0.921247	-0.210164	0.675081	0.256245	0.283857	0	0.0495933	0.0408842	-0.162684	0.280722	0.171745	0.0217209
YLR120C	YLR120C ... YPS1 protein processing aspartic-type endopeptidase activitcell wall (sensu Fungi) | YLR121C	1.23366	0.62729	0.619691	0.851305	0.146465	0.12164	0	1.01619	0.642138	0.546465	0.514054	-0.103323	0.228854	0	0.61512	0.324338	-0.41049	-0.30812	-0.610278	-0.0774144
YBR068C	YBR068C ... BAP2 amino acid transport amino acid transporter activity plasma membrane | YBR069C	0.7051	0.52082	0.237013	0.152906	0.156701	0.452373	0	0.528979	0.275815	0.278661	-0.0511831	-0.0913375	0.0172374	0	0.910647	0.710764	0.149747	0.0729284	-0.201115	0.0514724
YPR113W	YPR113W ... PIS1 cell cycle* CDP-diacylglycerol-inositol 3-phospendoplasmic reticulum* | YPR114W	0.927004	0.723491	1.09953	0.602963	0.460521	0.268446	0	0.499219	0.708064	0.604862	0.170136	0.196666	0.138311	0	0.378926	-0.260157	0.304682	-0.162832	-0.379955	-0.345454
YPL061W	YPL061W ... ALD6 acetate biosynthesis aldehyde dehydrogenase activity cytoplasm* | YPL062W	1.17827	1.27619	1.06115	1.3014	0.986188	0.837761	0	-0.37109	-0.164283	-0.0570729	0.557335	-0.0890442	-0.0559068	0	-0.576903	-0.45538	-0.260671	-0.136916	0.0846947	0.163104
YDR011W	YDR011W ... SNQ2 response to drug* xenobiotic-transporting ATPase actimitochondrion* | YDR012W	0.456586	0.396022	0.384054	0.129364	-0.504281	-0.300735	0	0.564154	0.37579	0.841753	0.266695	0.0816735	0.18866	0	-0.12012	-0.256645	-0.314178	-0.369855	-0.467757	-0.403311
YPL057C	YPL057C ... SUR1 sphingolipid biosynthesis* mannosyltransferase activity* intracellular | YPL058C	0.822813	0.559551	-0.0419726	0.217015	0.0735227	0.0213176	0	0.594733	0.262555	0.0155005	0.358202	-0.0270911	0.213408	0	0.395758	0.00459143	-0.335536	-0.190867	-0.48735	-0.256782
YKR003W	YKR003W ... OSH6 steroid biosynthesis oxysterol binding cellular component unknown | YKR004C	0.974698	1.25631	0.0383547	0.582252	0.0304416	0.158756	0	0.968768	1.2467	0.342363	0.38723	0.349483	0.471481	0	-0.501136	-0.47849	-0.368978	-0.169304	0.419267	0.282473
YPL265W	YPL265W ... DIP5 amino acid transport amino acid transporter activity* plasma membrane | YPL266W	-5.58e-05	-0.124924	0.419571	0.70564	0.0986623	0.471689	0	0.481851	0.247865	0.790882	0.437333	0.262595	0.717599	0	-0.645904	-0.654628	0.25873	0.395518	-0.614989	-0.336306
YKL051W	YKL051W ... SFK1 actin cytoskeleton organizatio molecular function unknown plasma membrane | YKL052C	1.525	1.17008	0.951743	0.892825	0.477485	0.443948	0	1.2563	0.99397	1.07079	0.544935	0.300188	0.104631	0	-0.479956	-0.984879	-0.31042	-0.291897	-0.546684	-0.451428
YMR015C	YMR015C ... ERG5 ergosterol biosynthesis C-22 sterol desaturase activity endoplasmic reticulum | YMR016C	0.498366	0.284416	0.480016	0.590368	0.0600899	0.0394194	0	0.494226	0.362725	0.874458	0.700081	0.209268	0.250088	0	0.147727	-0.20255	0.160723	-0.0669038	-0.341133	-0.253684
YGR097W	YGR097W ... ASK10 response to oxidative stress* transcription regulator activity cytoplasm* | YGR098C	1.07281	1.03137	0.454963	0.757688	0.591394	0.750689	0	0.315353	0.253001	0.825253	0.748642	-0.107812	-0.123762	0	-0.453498	-0.284291	-1.06802	-0.577943	-0.144462	-0.325777
YLR064W	YLR064W ... YLR064W biological process unknown molecular function unknown endoplasmic reticulum | YLR065C	0.716057	0.646043	0.242342	0.261207	-0.0192403	-0.0369211	0	0.675295	0.535587	0.0696063	-0.0168305	0.0717464	-0.00219359	0	0.217909	-0.207577	-0.164023	-0.0983374	-0.427625	-0.143176
YPL088W	YPL088W ... YPL088W aldehyde metabolism aryl-alcohol dehydrogenase activitycellular component unknown | YPL089C	0.841128	0.800574	0.0664707	0.586345	0.0108535	0.137892	0	0.88353	1.19671	0.123193	0.345761	0.188543	0.282424	0	-0.715396	-1.05807	-0.895918	-0.516623	0.117002	-0.105562
YOR298C-A	YOR298C-A ... MBF1 positive regulation of transcr transcription coactivator activity nucleus* | YOR298W	0.630848	0.762267	0.131046	0.340225	-0.0830302	-0.168204	0	0.42807	0.959804	-0.0406171	0.388001	-0.0794443	-0.169056	0	-0.388142	-0.552858	0.00466912	0.283368	-0.431251	-0.122643
YLR100W	YLR100W ... ERG27 ergosterol biosynthesis 3-keto sterol reductase activity endoplasmic reticulum* | YLR101C	0.460858	0.473179	0.298919	0.584988	0.00331981	0.0514522	0	0.264791	0.451232	0.341765	0.350926	0.353887	0.250007	0	-0.764529	-1.04117	-0.483704	-0.48845	-0.16467	-0.331539
YGL055W	YGL055W ... OLE1 mitochondrion inheritance* stearoyl-CoA 9-desaturase activity endoplasmic reticulum membrane | YGL056C	1.43676	1.30092	0.987007	1.0842	-0.0385479	0.500085	0	1.24189	1.18942	0.200154	-0.418177	0.179589	0.143463	0	0.588685	0.351279	-0.447346	-0.61572	0.0206376	-0.428814
YBR085C-A	YBR085C-A ... YBR085C-A biological process unknown molecular function unknown cytoplasm* | YBR085W	1.49717	1.29712	0.269266	0.575583	-0.257925	-0.176779	0	1.07273	1.06992	-0.119891	0.19741	-0.228191	-0.211438	0	0.478246	0.670241	-0.264197	0.405367	-0.0970715	0.101573
YOR175C	YOR175C … ALE1 biological process unknown O-acyltransferase activity | Broad-specificity lysophospholipid acyltransferase, part of MBOAT family of membrane-bound O-acyltransferases; key component of Lands cycle; may have role in fatty acid exchange at sn-2 position of mature glycerophospholipidsYOR176W	1.79692	1.6456	0.645667	0.326849	-0.108818	-0.0807689	0	1.49478	1.36678	-0.0316182	-0.0650343	0.0819234	-0.0194039	0	0.0857181	-0.139935	-0.107176	0.0203042	0.0744962	-0.0123095
YCR037C	YCR037C ... PHO87 phosphate transport inorganic phosphate transporter actmembrane | YCR038C	0.56375	0.595168	0.629903	0.608681	0.351575	0.483139	0	0.297464	0.311899	0.626267	0.186587	0.253093	0.120742	0	-0.186608	-0.0408896	-0.316916	-0.11699	-0.163406	-0.184793
YJL097W	YJL097W … PHS1 biological process unknown molecular function unknown | Essential 3-hydroxyacyl-CoA dehydratase of the ER membrane, involved in elongation of very long-chain fatty acids; evolutionarily conserved, similar to mammalian PTPLA and PTPLB; involved in sphingolipid biosynthesis and protein traffickingYJL098W	1.47467	1.45775	0.840125	0.684508	0.332396	0.412118	0	1.30247	1.30461	0.396332	0.349156	0.179087	0.350586	0	0.397243	0.139116	-0.0496894	-0.139887	-0.356981	-0.206653
YDL138W	YDL138W ... RGT2 signal transduction* receptor activity* plasma membrane | YDL139C	0.64701	0.966503	0.571744	0.906641	0.496963	0.950998	0	0.0924715	0.323997	-0.0196343	-0.119548	-0.356668	-0.0535599	0	-0.565785	-0.195057	-0.513088	-0.415199	-0.855222	-0.691161
YLR450W	YLR450W ... HMG2 ergosterol biosynthesis hydroxymethylglutaryl-CoA reductaseendoplasmic reticulum membrane* | YLR451W	1.23431	0.796247	0.209907	0.169851	-0.48598	-0.166892	0	1.16075	0.835537	0.186468	-0.0863504	-0.268864	-0.208251	0	0.416297	0.121649	-0.0559761	0.119217	-0.416002	-0.230263
YKL008C	YKL008C ... LAC1 ceramide biosynthesis* sphingosine N-acyltransferase activendoplasmic reticulum | YKL009W	0.976383	1.08764	0.424799	0.0186783	-0.390847	-0.340663	0	0.877995	0.843718	0.285806	0.050131	0.0046932	0.242703	0	0.347478	0.0294738	0.148528	-0.285168	-0.713434	-0.63287
YDR107C	YDR107C … TMN2 biological process unknown molecular function unknown | Protein with a role in cellular adhesion and filamentous growth; similar to Emp70p and Tmn3p; member of the evolutionarily conserved Transmembrane Nine family of proteins with nine membrane-spanning segmentsYDR108W	1.43826	1.06086	-0.10738	-0.337434	0.0218778	-0.01599	0	1.42431	0.861	0.478944	-0.186616	0.225641	0.25349	0	0.562778	0.222989	-0.041805	-0.096093	0.00408893	0.228045
YNR030W	YNR030W … ALG12 protein amino acid glycosylati "alpha-1,6-mannosyltransferase activ"endoplasmic reticulum | Alpha-1,6-mannosyltransferase localized to the ER; responsible for the addition of the alpha-1,6 mannose to dolichol-linked Man7GlcNAc2, acts in the dolichol pathway for N-glycosylationYNR031C	0.85497	0.657301	1.62976	1.57165	1.29153	1.24166	0	0.484935	0.365783	0.568529	0.241681	0.0919542	0.149389	0	0.370972	0.153254	-0.0372973	-0.113588	-0.248596	-0.109691
YLL051C	YLL051C ... FRE6 biological process unknown ferric-chelate reductase activity vacuole (sensu Fungi) | YLL052C	1.29534	1.03848	0.385575	0.951905	0.657048	0.732073	0	0.987864	0.765608	0.77345	0.589934	0.720787	0.763709	0	0.0266822	-0.22215	-0.694483	-0.611316	-0.788288	-0.4515
Cluster_7	#N/A	0	0	0	0	0	0	0	0	0	0	0	0	0	0	0	0	0	0	0	0
YIL018W	YIL018W RP cluster RPL2B protein biosynthesis structural constituent of ribosome cytosolic large ribosomal subunit ( | YIL019W	-0.277003	-0.26759	-0.165241	-0.23834	-0.244451	-0.2872	0	-0.235291	-0.258652	-0.256443	-0.334581	-0.364461	-0.417502	0	0.0307446	-0.408247	-0.107234	-0.224028	-0.46216	-0.428424
YDL061C	YDL061C RP cluster RPS29B protein biosynthesis structural constituent of ribosome cytosolic small ribosomal subunit ( | YDL062W	-0.262986	-0.119015	0.000419	-0.281009	-0.162594	-0.0926057	0	-0.329297	-0.33119	-0.337688	-0.400065	-0.198067	-0.218875	0	-0.091215	-0.693935	0.100328	-0.30188	-0.374241	-0.413701
YDR331W	YDR331W ... GPI8 attachment of GPI anchor to pr GPI-anchor transamidase activity GPI-anchor transamidase complex | YDR332W	-0.407313	-0.264424	-0.160554	-0.135951	-0.277096	-0.431362	0	-0.464424	-0.384704	-0.480284	-0.191664	-0.13678	-0.239521	0	-0.180625	-0.266005	-0.294275	-0.0845576	-0.0816825	-0.240271
YPR016C	YPR016C PAC cluster TIF6 ribosomal large subunit biogen molecular function unknown cytoplasm* | YPR016W-A	-0.0356314	-0.0386595	-0.0699144	-0.209515	-0.217236	-0.320047	0	-0.0940579	-0.0231663	-0.40957	-0.501413	-0.262894	-0.199775	0	-0.132928	-0.635341	-0.100843	-0.32942	-0.423429	-0.474024
YEL026W	YEL026W RP cluster SNU13 nuclear mRNA splicing, via spl RNA binding nucleolus* | YEL027W	-0.36803	-0.430446	-0.0429103	-0.160872	-0.231179	-0.305158	0	-0.340626	-0.370771	-0.405265	-0.359806	-0.319868	-0.245763	0	-0.0349868	-0.700211	-0.0146048	-0.234083	-0.438654	-0.498136
YNL069C	YNL069C RP cluster RPL16B protein biosynthesis structural constituent of ribosome*cytosolic large ribosomal subunit ( | YNL070W	-0.165666	-0.205496	-0.106449	-0.182243	-0.221698	-0.186951	0	-0.135383	-0.187829	-0.212116	-0.237962	-0.319874	-0.219119	0	0.101022	-0.416964	-0.0662594	-0.190959	-0.412336	-0.359178
YDR064W	YDR064W RP cluster RPS13 protein biosynthesis structural constituent of ribosome cytosolic small ribosomal subunit ( | YDR065W	-0.520044	-0.56179	-0.171397	-0.361093	-0.341776	-0.354383	0	-0.285519	-0.249563	-0.3776	-0.258742	-0.287729	-0.195992	0	-0.0774543	-0.764788	-0.0500425	-0.239722	-0.416024	-0.40862
YPL220W	YPL220W RP cluster RPL1A protein biosynthesis structural constituent of ribosome cytosolic large ribosomal subunit ( | YPL221W	-0.228768	-0.107209	-0.278112	-0.0729064	-0.165345	0.0111234	0	-0.168372	-0.377252	-0.198821	-0.262612	-0.145485	0.0107323	0	-0.263645	-0.711764	-0.364419	-0.396549	-0.431209	-0.424569
YGL135W	YGL135W RP cluster RPL1B protein biosynthesis structural constituent of ribosome cytosolic large ribosomal subunit ( | YGL136C	-0.155619	-0.143923	-0.0628714	-0.0652357	-0.181038	-0.219935	0	-0.15213	0.00985123	-0.211687	-0.104929	-0.228997	-0.177455	0	0.0440637	-0.397329	-0.0694526	-0.184743	-0.424768	-0.37389
YOR369C	YOR369C RP cluster RPS12 protein biosynthesis structural constituent of ribosome cytosolic small ribosomal subunit ( | YOR370C	-0.340049	-0.279392	-0.121343	-0.143005	-0.0889373	-0.226181	0	-0.411606	-0.259864	-0.379157	-0.217857	-0.172723	-0.284636	0	-0.177185	-0.658582	-0.101946	-0.221777	-0.244167	-0.349024
YCR031C	YCR031C RP cluster RPS14A protein biosynthesis* structural constituent of ribosome*cytosolic small ribosomal subunit ( | YCR032W	-0.256861	-0.273176	-0.00532467	-0.121949	-0.126255	-0.226323	0	-0.227314	-0.210782	-0.180785	-0.232885	-0.216904	-0.298095	0	-0.033728	-0.697041	-0.0157663	-0.171897	-0.365425	-0.418241
YPL143W	YPL143W RP cluster RPL33A protein biosynthesis structural constituent of ribosome cytosolic large ribosomal subunit ( | YPL144W	-0.472859	-0.31357	-0.0841476	-0.195544	-0.180125	-0.345262	0	-0.367948	-0.112724	-0.317961	-0.181875	-0.150458	-0.182139	0	-0.220766	-0.597087	-0.0566926	-0.157832	-0.247931	-0.32029
YDL083C	YDL083C RP cluster RPS16B protein biosynthesis structural constituent of ribosome cytosolic small ribosomal subunit ( | YDL084W	-0.396746	-0.267891	-0.0700875	-0.102714	-0.20796	-0.263009	0	-0.342405	-0.290876	-0.228992	-0.202405	-0.21589	-0.201902	0	-0.252653	-0.541033	-0.19541	-0.286716	-0.29599	-0.424803
YOL120C	YOL120C PAC cluster RPL18A protein biosynthesis structural constituent of ribosome cytosolic large ribosomal subunit ( | YOL121C	-0.297535	-0.314261	-0.132838	-0.249635	-0.294302	-0.369814	0	-0.27111	-0.204434	-0.400144	-0.26323	-0.276614	-0.299719	0	-0.0532322	-0.482045	-0.136112	-0.24881	-0.385539	-0.400517
YJR123W	YJR123W RP cluster RPS5 protein biosynthesis structural constituent of ribosome cytosolic small ribosomal subunit ( | YJR124C	-0.341982	-0.303966	-0.123195	-0.146041	-0.219088	-0.2979	0	-0.307163	-0.305982	-0.373829	-0.311933	-0.270614	-0.311586	0	-0.104585	-0.468013	-0.228098	-0.215498	-0.175207	-0.341592
YMR242C	YMR242C RP cluster RPL20A protein biosynthesis structural constituent of ribosome cytosolic large ribosomal subunit ( | YMR242W-A	-0.391069	-0.29785	-0.247156	-0.21358	-0.127193	-0.315089	0	-0.372502	-0.179914	-0.349067	-0.134417	-0.144957	-0.18605	0	-0.187753	-0.55386	-0.197916	-0.209979	-0.207485	-0.333801
YMR143W	YMR143W PAC cluster RPS16A protein biosynthesis structural constituent of ribosome cytosolic small ribosomal subunit ( | YMR144W	-0.290243	-0.242996	-0.152693	-0.176781	-0.237299	-0.24669	0	-0.228092	-0.284334	-0.177143	-0.251335	-0.272337	-0.208354	0	-0.157102	-0.48117	-0.251749	-0.252238	-0.286929	-0.412251
YEL054C	YEL054C RP cluster RPL12A protein biosynthesis* structural constituent of ribosome cytosolic large ribosomal subunit ( | YEL055C	-0.30839	-0.182811	-0.0966723	-0.119353	-0.153488	-0.254103	0	-0.290262	-0.11788	-0.406122	-0.200921	-0.215919	-0.170813	0	-0.10853	-0.563524	-0.173118	-0.184854	-0.214314	-0.374098
YLR048W	YLR048W RP cluster RPS0B protein biosynthesis* structural constituent of ribosome cytosolic small ribosomal subunit ( | YLR049C	-0.38224	-0.324771	-0.216977	-0.315659	-0.359721	-0.331246	0	-0.265503	-0.272529	-0.450211	-0.371735	-0.382662	-0.282939	0	-0.050301	-0.507313	-0.201009	-0.286541	-0.39283	-0.414608
YGR034W	YGR034W RP cluster RPL26B protein biosynthesis structural constituent of ribosome*cytosolic large ribosomal subunit ( | YGR035C	-0.452641	-0.173318	-0.169379	-0.0740344	-0.172957	-0.206191	0	-0.448093	-0.187694	-0.294093	-0.173672	-0.146357	-0.143464	0	-0.285247	-0.467139	-0.163349	-0.195807	-0.18483	-0.334385
YMR079W	YMR079W PAC cluster SEC14 sporulation (sensu Fungi)* phosphatidylinositol transporter accytosol | YMR080C	-0.220495	-0.173647	-0.258613	-0.198367	-0.24854	-0.295078	0	-0.145746	-0.136653	-0.569244	-0.223524	-0.282542	-0.269284	0	-0.235048	-0.575419	-0.37347	-0.353632	-0.417453	-0.426751
YOR167C	YOR167C RP cluster RPS28A protein biosynthesis structural constituent of ribosome cytosolic small ribosomal subunit ( | YOR168W	-0.509356	-0.511479	-0.09957	-0.287097	-0.243057	-0.429156	0	-0.348744	-0.270409	-0.205809	-0.179468	-0.1757	-0.231247	0	-0.386987	-0.932312	-0.121067	-0.281807	-0.478135	-0.490548
YJL138C	YJL138C RP cluster TIF2 translational initiation* translation initiation factor activcytoplasm* | YJL139C	-0.296104	-0.453062	-0.10365	-0.0204557	-0.164079	-0.144036	0	-0.451255	-0.230045	-0.202665	-0.0681463	-0.167625	-0.111113	0	-0.138512	-0.527613	-0.19862	-0.195963	-0.212477	-0.327328
YIL133C	YIL133C RP cluster RPL16A protein biosynthesis structural constituent of ribosome*cytosolic large ribosomal subunit ( | YIL134C-A	-0.443655	-0.426446	-0.17501	-0.180359	-0.332865	-0.397201	0	-0.454578	-0.365494	-0.362564	-0.228008	-0.360374	-0.306967	0	-0.19652	-0.601062	-0.141965	-0.187857	-0.315935	-0.448937
YML024W	YML024W RP cluster RPS17A protein biosynthesis* structural constituent of ribosome cytosolic small ribosomal subunit ( | YML025C	-0.349801	-0.148776	-0.0785248	0.0693569	-0.158425	-0.185075	0	-0.374756	-0.235224	-0.142214	-0.0641351	-0.0987876	-0.0335562	0	-0.246062	-0.583829	-0.248442	-0.196967	-0.180541	-0.303814
YGL123W	YGL123W RP cluster RPS2 protein biosynthesis* structural constituent of ribosome cytosolic small ribosomal subunit ( | YGL124C	-0.373894	-0.285739	-0.205659	-0.180947	-0.14835	-0.214604	0	-0.284645	-0.231804	-0.319734	-0.183874	-0.117407	-0.196066	0	-0.0764754	-0.329421	-0.2331	-0.18535	-0.131148	-0.35084
YKL006W	YKL006W RP cluster RPL14A protein biosynthesis structural constituent of ribosome*cytosolic large ribosomal subunit ( | YKL007W	-0.379152	-0.254672	-0.113242	-0.289736	-0.200501	-0.365145	0	-0.329277	-0.272264	-0.256635	-0.222258	-0.220038	-0.333032	0	-0.127117	-0.580411	0.0450685	-0.196232	-0.360843	-0.421316
YJL190C	YJL190C RP cluster RPS22A protein biosynthesis structural constituent of ribosome cytosolic small ribosomal subunit ( | YJL191W	-0.437082	-0.349868	-0.107671	-0.223349	-0.21147	-0.339574	0	-0.311252	-0.0806963	-0.304644	-0.207211	-0.216264	-0.181526	0	-0.205142	-0.657112	-0.0927427	-0.222217	-0.422445	-0.387853
YHR021C	YHR021C PAC cluster RPS27B protein biosynthesis structural constituent of ribosome cytosolic small ribosomal subunit ( | YHR021W-A	-0.331591	-0.459887	-0.0148592	-0.244712	-0.245911	-0.545537	0	-0.397607	-0.236578	-0.295664	-0.106493	-0.276686	-0.372685	0	-0.131312	-0.746324	0.154783	-0.137509	-0.573089	-0.429263
YHL011C	YHL011C PAC cluster PRS3 histidine biosynthesis* ribose-phosphate diphosphokinase accytoplasm | YHL012W	-0.413681	-0.492931	-0.180816	-0.204636	-0.249932	-0.228788	0	-0.190106	-0.162235	-0.242453	-0.106104	-0.0718595	-0.0547381	0	-0.223348	-0.605973	-0.349541	-0.334453	-0.12946	-0.488728
YDR321W	YDR321W PAC cluster ASP1 asparagine catabolism asparaginase activity cytosol* | YDR322C-A	-0.192254	-0.122306	-0.0874585	-0.26588	-0.295638	-0.108068	0	-0.204314	-0.252194	-0.378901	-0.282318	-0.284626	-0.169381	0	-0.165975	-0.599321	-0.19437	-0.383726	-0.462623	-0.373285
Cluster_8	#N/A	0	0	0	0	0	0	0	0	0	0	0	0	0	0	0	0	0	0	0	0
YER064C	YER064C ... YER064C regulation of transcription molecular function unknown nucleus | YER065C	0.0744871	0.225944	-0.420417	-0.188208	-0.517091	-0.262879	0	-0.261078	-0.117452	-0.639963	-0.228213	-0.415155	-0.558398	0	-0.0234883	0.150576	-0.550265	-0.0321151	-0.152605	-0.198558
YPL081W	YPL081W RP cluster RPS9A protein biosynthesis* structural constituent of ribosome cytoplasm* | YPL082C	-1.04154	-0.747622	-0.402278	-0.25899	-0.722715	-0.758728	0	0.00532831	0.495501	-0.179759	0.1118	0.0869361	0.0443007	0	-0.099452	-0.209484	0.149837	0.3307	0.375049	0.00882117
YGL255W	YGL255W ... ZRT1 high-affinity zinc ion transpo high affinity zinc uptake transportintegral to plasma membrane | YGL256W	-1.41129	-1.21352	-0.299448	-0.303083	-0.0355324	-0.195777	0	-1.32883	-1.39093	-0.932482	-1.76831	-0.410305	0.291643	0	1.07325	0.716449	-0.235051	-0.626829	-0.190825	0.253675
YKL085W	YKL085W ... MDH1 tricarboxylic acid cycle* L-malate dehydrogenase activity mitochondrial matrix | YKL086W	0.361957	0.429816	0.401561	0.633255	-0.11831	-0.350242	0	0.0906865	0.201959	-0.0762893	0.0246349	-0.310497	-0.711302	0	0.49128	0.814424	0.299012	0.580295	0.793721	0.644159
YLR367W	YLR367W RP cluster RPS22B protein biosynthesis structural constituent of ribosome cytosolic small ribosomal subunit ( | YLR368W	-1.95019	-1.77888	-2.10846	-2.07277	-1.22137	-1.25603	0	-0.327146	-0.471973	-0.812028	-0.738876	-0.629164	-0.525335	0	0.165067	-0.311203	-0.179269	-0.0858146	-0.340885	-0.384737
YNL220W	YNL220W ... ADE12 purine nucleotide biosynthesis adenylosuccinate synthase activity cytoplasm | YNL221C	-1.28049	-1.2981	-2.2451	-1.86767	-0.376395	-0.585127	0	-0.401144	-0.541179	-0.630597	-0.0880496	0.521468	0.271197	0	-0.217299	-0.71899	-0.220923	-0.342064	0.416449	0.113517
YJL166W	YJL166W ... QCR8 aerobic respiration* ubiquinol-cytochrome-c reductase acrespiratory chain complex III (sens | YJL167W	-0.219422	-0.270922	0.0248548	-0.00195829	-0.517843	-0.661533	0	-0.339079	-0.0573472	-0.398559	-0.39159	-0.771762	-0.629006	0	0.461532	0.241969	0.570282	0.644747	0.364878	0.396578
YNL052W	YNL052W ... COX5A aerobic respiration* cytochrome-c oxidase activity respiratory chain complex IV (sensu | YNL053W	-0.462871	-0.509629	-0.461793	-0.429044	-0.791783	-0.918235	0	-0.559003	-0.603708	-0.6466	-0.718803	-0.906619	-0.949356	0	0.397973	0.168309	0.178913	0.141628	0.174825	0.11517
YAR050W	YAR050W ... FLO1 flocculation (sensu Saccharomy mannose binding cell wall (sensu Fungi) | YAR053W	0.871088	0.842949	0.231422	0.261295	-0.0879998	0.995108	0	0.930463	0.58021	0.214528	0.109433	-0.0717809	0.988684	0	2.18398	1.96767	1.85128	1.95252	1.53249	1.91049
YPL245W	YPL245W PAC cluster YPL245W biological process unknown molecular function unknown cytoplasm* | YPL246C	-0.196324	-0.34405	0.143255	0.269632	0.0629421	0.35266	0	0.0476047	0.0299435	-0.191566	0.0719273	0.378888	0.346457	0	1.29067	0.626822	1.06111	1.17056	1.43412	1.18481
YEL024W	YEL024W ... RIP1 aerobic respiration* ubiquinol-cytochrome-c reductase acrespiratory chain complex III (sens | YEL025C	0.143432	-0.0662574	0.133433	0.0991548	-0.479687	-0.471888	0	-0.00204758	-0.0954726	-0.223173	-0.429734	-0.934871	-0.718196	0	0.920842	0.682193	0.469722	0.355156	-0.0223418	0.202769
YNL173C	YNL173C ... MDG1 signal transduction during con molecular function unknown plasma membrane | YNL174W	-0.0248816	1.17707	-0.0713768	0.332925	0.0495037	0.33125	0	-0.285124	1.17967	1.3505	0.899881	0.445865	0.513195	0	0.0615018	2.1322	0.732412	1.44412	2.24856	1.70998
YKL109W	YKL109W ... HAP4 transcription* transcriptional activator activity CCAAT-binding factor complex | YKL110C	0.0809756	0.385256	0.289194	0.856652	0.507293	0.317961	0	-0.100819	0.176434	0.0163932	0.500517	0.192168	0.142136	0	1.07652	1.22418	0.746931	1.49207	1.33447	1.03093
YHR008C	YHR008C ... SOD2 replicative cell aging* manganese superoxide dismutase actimitochondrion* | YHR009C	0.911559	0.794039	0.21817	0.357051	0.335235	0.0595514	0	0.735079	0.633848	0.402866	0.426446	0.0579649	-0.240705	0	0.950016	1.24068	1.17872	1.38361	1.34167	1.33092
YBR126C	YBR126C iESR cluster TPS1 response to stress* "alpha,alpha-trehalose-phosphate syn"cytoplasm* | YBR127C	0.560426	0.406791	-0.246132	0.108933	-0.722128	-0.664586	0	0.333892	0.51555	-0.0183466	0.174427	-0.302545	-0.466696	0	0.437488	0.683742	0.0241259	0.269806	-0.0794394	0.519584
YMR305C	YMR305C ... SCW10 conjugation with cellular fusi glucosidase activity cytoplasm* | YMR306C-A	-0.0796073	-0.391189	0.210972	0.0874337	-0.532016	-0.91886	0	-0.0370506	-0.340909	-0.188185	0.192512	-0.894772	-0.477395	0	0.239715	-0.0511581	0.0409063	0.164623	-0.418874	-0.329236
YKR011C	YKR011C iESR cluster YKR011C biological process unknown molecular function unknown nucleus | YKR012C	1.12032	1.10045	0.226621	1.1086	0.759997	-0.398323	0	0.669076	1.21408	0.903542	0.870167	0.545075	-0.446545	0	0.337631	1.02839	0.930008	1.35342	1.57228	1.27399
YER062C	YER062C ... HOR2 response to osmotic stress* glycerol-1-phosphatase activity cytoplasm* | YER063W	0.098786	-0.462105	-0.603454	0.123523	-0.417705	-1.20143	0	0.749579	1.10156	1.45044	1.38522	0.379415	-0.172249	0	1.57271	1.56322	2.34489	2.87723	1.82857	1.70572
YPL207W	YPL207W … PAC cluster TYW1 biological process unknown molecular function unknown | Protein required for the synthesis of wybutosine, a modified guanosine found at the 3'-position adjacent to the anticodon of phenylalanine tRNA which supports reading frame maintenance by stabilizing codon-anticodon interactionsYPL208W	-0.605669	-0.145674	0.141495	-0.45169	-0.452602	-0.100058	0	-0.679944	-0.514721	-0.194902	-0.864571	-0.567487	-0.46939	0	-0.0644603	0.0404702	0.0964294	0.0657945	0.608385	0.238245
YMR304C-A	YMR304C-A ... | YMR304W	-0.140359	-0.372064	0.0724504	-0.125036	-0.670388	-1.0063	0	-0.103704	-0.127763	-0.308183	0.151519	-1.06422	-0.420475	0	0.0740705	-0.154406	0.0258155	-0.0695344	-0.584673	-0.143346
YBL106C	YBL106C ... SRO77 exocytosis* molecular function unknown plasma membrane | YBL107C	-0.514997	-0.157051	-0.542424	-0.0319053	-0.831435	-0.414768	0	-1.20286	-1.29203	-0.817005	-0.697922	-1.26793	-0.490609	0	-0.226179	-0.369707	-0.546995	-0.18734	-0.036196	-0.0905627
YJL048C	YJL048C iESR cluster UBX6 ubiquitin-dependent protein ca molecular function unknown nucleus | YJL049W	-0.0565027	0.015285	-0.171608	0.314367	-1.03142	-0.427029	0	-0.57214	-0.720544	0.384108	0.167559	-0.31245	-0.620754	0	0.671427	0.769097	0.788241	0.786347	0.559108	0.575233
YBL064C	YBL064C iESR cluster PRX1 regulation of cell redox homeo thioredoxin peroxidase activity mitochondrion | YBL065W	0.261583	0.202452	-0.403901	-0.491612	-0.165479	-0.480614	0	0.535971	0.661925	-0.0851723	-0.133137	-0.162784	-0.539167	0	1.22655	1.3459	1.04654	0.977128	1.68914	1.87723
YDL171C	YDL171C ... GLT1 glutamate biosynthesis glutamate synthase (NADH) activity mitochondrion* | YDL172C	-1.05972	-0.988656	-0.799483	-0.788232	-0.614373	-0.124533	0	-0.776861	-1.03086	-0.319906	-0.0172614	-0.645178	-0.234229	0	-0.360742	-0.60573	-0.0748322	-0.0371622	-0.491715	-0.265984
YER158C	YER158C iESR cluster YER158C biological process unknown molecular function unknown cellular component unknown | YER159C	0.102083	-0.142797	-0.353047	-0.576648	-1.2445	-0.953053	0	0.352884	-0.409594	-0.0646915	-0.443108	-0.413373	-0.645577	0	0.609244	0.274923	0.681238	0.421534	0.123765	-0.0784432
YLR304C	YLR304C ... ACO1 mitochondrial genome maintenan aconitate hydratase activity cytosol* | YLR305C	-1.19635	-1.15173	0.215022	0.444629	-0.991471	-0.959816	0	-0.708907	-0.915496	-0.273548	0.350701	-0.859394	-0.782994	0	0.292078	-0.218415	0.380564	0.593567	-0.221083	-0.0313461
YGR065C	YGR065C ... VHT1 biotin transport biotin transporter activity plasma membrane | YGR066C	-0.296026	-0.397498	-1.02327	-0.538633	-0.84869	-0.325439	0	-0.918712	-1.17302	-1.13968	-0.891957	-1.00039	-0.480873	0	0.151694	0.114701	-0.754944	-0.576306	-0.763549	-0.401005
YLR460C	YLR460C ... YLR460C biological process unknown molecular function unknown cellular component unknown | YLR461W	0.770374	1.32308	0.0339762	0.257632	0.233928	0.732073	0	0.566715	1.2017	-0.0234433	0.039044	0.58559	1.22655	0	1.28838	1.39934	0.414156	1.05277	1.45715	1.79184
YKL062W	YKL062W ... MSN4 response to stress* DNA binding* cytoplasm* | YKL063C	0.404382	0.178259	1.3825	1.86732	-0.925447	-1.15328	0	0.820827	0.939905	0.596507	0.741139	-0.693209	-0.73281	0	2.45819	2.46028	0.680018	1.0197	1.35921	1.33222
YMR281W	YMR281W ... GPI12 GPI anchor biosynthesis N-acetylglucosaminylphosphatidylinoendoplasmic reticulum membrane | YMR282C	-0.170732	-0.052446	-0.177528	0.0234341	-0.762904	-0.94452	0	-0.370092	-0.256291	0.255217	0.113683	-0.265092	-0.604678	0	0.156444	-0.0483832	0.539137	0.416548	0.248913	-0.00079
YPL221W	YPL221W … FLC1 (BOP1) DNA replication initiation* chromatin binding* cytoplasm* | Putative FAD transporter; required for uptake of FAD into endoplasmic reticulum; involved in cell wall maintenanceYPL222W	-0.167992	-0.296706	-0.225283	0.0795774	-0.642736	-0.648384	0	-0.436031	-0.60217	-0.395857	0.213003	-1.11642	-0.625031	0	0.156714	-0.00389756	-0.443887	-0.241836	-0.274966	-0.0449758
YNL216W	YNL216W ... RAP1 chromatin silencing at telomer DNA binding* nucleus* | YNL217W	-0.651131	-0.579026	-0.599357	-0.312212	-0.533885	-0.531474	0	-0.873258	-0.614994	-0.494426	-0.336393	-0.422618	-0.538884	0	-0.64206	-0.566173	-0.513503	-0.0465316	-0.0276323	-0.330729
YLR395C	YLR395C ... COX8 aerobic respiration* cytochrome-c oxidase activity respiratory chain complex IV (sensu | YLR396C	-0.634481	-0.531351	-0.236779	-0.33784	-0.64082	-0.972799	0	-0.580401	-0.287204	-0.663694	-0.461687	-0.58983	-0.826131	0	0.29646	0.225309	0.299726	0.336095	0.1775	0.159322
YMR199W	YMR199W ... CLN1 regulation of cyclin dependent cyclin-dependent protein kinase regcytoplasm* | YMR200W	-0.722036	-0.30576	0.172647	0.415178	-0.174711	-0.537423	0	-0.324492	-0.205051	-0.418921	0.478329	-0.11485	0.0718558	0	0.420931	0.804322	0.238195	0.443606	1.6636	0.941541
YDR134C	YDR134C	-1.12261	-0.988553	0.0473718	-0.700504	-0.702346	-0.996226	0	-1.21481	-0.948321	-1.2015	-1.18465	-0.879221	-1.06314	0	1.07334	0.83714	0.988686	0.694847	0.333026	0.73941
YGL146C	YGL146C … RRT6 biological process unknown molecular function unknown | Putative protein of unknown function; non-essential gene identified in a screen for mutants with increased levels of rDNA transcription; contains two putative transmembrane spans, but no significant homology to other known proteinsYGL147C	1.13593	0.283982	0.636641	1.25377	0.327038	1.09464	0	0.728178	0.236256	0.0528709	1.11304	0.573206	1.06689	0	1.19191	0.962274	0.590006	1.50528	1.60915	1.96721
YPL189W	YPL189W ... GUP2 glycerol transport O-acyltransferase activity membrane | YPL190C	-1.26265	-0.800907	-0.364573	-0.908452	-1.46651	-1.30035	0	-0.896618	-0.857195	-1.05022	-0.82198	-2.13722	-1.58723	0	0.493471	0.427907	1.02418	0.566983	0.420841	0.682459
YHR143W	YHR143W ... DSE2 cell wall organization and bio "glucan 1,3-beta-glucosidase activit"cell wall (sensu Fungi)* | YHR143W-A	-0.104369	-0.435649	0.373108	0.275017	-0.0792118	-0.270878	0	0.131344	-0.521657	0.0335997	0.520577	-0.690294	-0.0741583	0	0.535933	0.0803724	-0.0599213	-0.286654	-0.38359	-0.479281
YDL067C	YDL067C ... COX9 aerobic respiration* cytochrome-c oxidase activity respiratory chain complex IV (sensu | YDL068W	-0.20079	0.0909942	-0.0359258	-0.183081	-0.58028	-0.606451	0	-0.511598	-0.154893	-0.675071	-0.564927	-0.65604	-0.795113	0	0.327972	0.345938	0.0384155	0.105058	0.0800027	0.151686
YLR134W	YLR134W PAC cluster PDC5 pyruvate metabolism* pyruvate decarboxylase activity cytoplasm* | YLR135W	-0.191794	-0.189473	-0.411583	-0.314754	-0.139074	-0.0838436	0	0.0593419	0.140019	0.034837	0.0594118	-0.273839	-0.257855	0	1.61358	0.937048	1.93771	0.816382	2.48297	2.74222
YHR051W	YHR051W ... COX6 aerobic respiration* cytochrome-c oxidase activity respiratory chain complex IV (sensu | YHR052W	-0.292347	-0.313882	-0.367075	-0.185629	-0.529623	-0.580532	0	-0.231235	-0.394361	-0.35069	-0.191852	-0.500177	-0.476449	0	0.546775	0.403739	0.242103	0.490396	0.41977	0.289343
YKL148C	YKL148C ... SDH1 tricarboxylic acid cycle* succinate dehydrogenase (ubiquinonerespiratory chain complex II (sensu | YKL149C	-0.813977	-0.80626	-0.532328	-1.24981	-1.10719	-1.55037	0	-0.581847	-0.613962	-0.572459	-0.409468	-1.23634	-1.65099	0	0.770703	0.95559	0.269397	0.0582748	-0.111771	0.329655
YGL188C	YGL188C ... | YGL188C-A	-0.225339	0.0537346	-0.277684	-0.118125	-0.598962	-0.56906	0	-0.382659	-0.440371	-0.363345	-0.642846	-0.716176	-0.655023	0	0.465735	0.364174	-0.110723	0.0109779	0.190604	0.139349
YIL069C	YIL069C ... RPS24B protein biosynthesis structural constituent of ribosome cytosolic small ribosomal subunit ( | YIL070C	-1.12273	-1.0999	-0.736261	-0.82192	-0.793901	-0.830452	0	-0.405746	-0.226753	-0.567602	-0.271123	-0.323415	-0.265079	0	-0.119763	-0.691929	-0.0434304	-0.135223	-0.239442	-0.417842
YOL136C	YOL136C ... PFK27 fructose 2,6-bisphosphate meta 6-phosphofructo-2-kinase activity cytoplasm | YOL137W	0.371586	0.369445	-0.0471909	0.195348	-0.505668	-0.389205	0	-0.0951079	-0.355827	-0.448057	-0.56559	-0.780884	-0.598688	0	0.31364	0.126762	-0.352595	-0.181208	-0.166535	-0.110669
YEL038W	YEL038W ... UTR4 biological process unknown molecular function unknown cytoplasm* | YEL039C	-0.294417	-0.317061	-0.822114	-1.06977	-0.794641	-0.92243	0	-0.466689	-0.485764	-1.43155	-1.17569	-1.05935	-1.24424	0	0.0147802	-0.631671	0.295076	0.137221	-0.127815	-0.102975
YER156C	YER156C ... YER156C biological process unknown molecular function unknown cytoplasm* | YER157W	-1.05215	-0.820909	-0.37079	-0.360056	-0.332747	-0.17791	0	-0.997293	-1.0685	-0.80349	-0.520475	-0.39109	-0.600368	0	-0.457562	-0.672257	-0.35526	-0.252926	0.143538	-0.273273
YDL206W	YDL206W ... YDL206W biological process unknown molecular function unknown cellular component unknown | YDL207W	0.946185	0.883591	0.0339762	0.611482	-0.386523	-0.0477285	0	1.22919	0.969253	0.302966	0.735038	-0.286461	0.091498	0	1.25041	1.01489	0.714657	1.08918	0.0920564	0.24368
YHR049W	YHR049W ... FSH1 biological process unknown serine hydrolase activity cytoplasm* | YHR050W	0.443788	0.356832	-0.42606	0.000141	0.175035	-0.195551	0	0.598793	0.292831	-0.410612	-0.0754147	-0.119511	-0.398871	0	2.25692	2.16221	1.45313	1.68364	2.03517	1.81485
YDL130W-A	YDL130W-A ... STF1 ATP synthesis coupled proton t molecular function unknown proton-transporting ATP synthase co | YDL131W	1.0309	1.30529	0.507907	1.16289	0.442515	-0.142396	0	1.09028	2.16517	1.0593	1.0209	0.75962	0.252543	0	0.627586	1.71645	0.432126	1.24625	2.55257	1.79807
YDL194W	YDL194W ... SNF3 signal transduction* receptor activity* plasma membrane | YDL195W	0.616723	0.646552	0.44579	0.284882	0.487115	0.382489	0	0.828101	0.535816	0.941241	0.346473	0.679831	0.612066	0	1.23156	1.45358	1.06873	0.984734	1.35632	1.25814
YOR009W	YOR009W ... TIR4 biological process unknown molecular function unknown cell wall (sensu Fungi) | YOR010C	0.677264	0.370461	-0.0347365	-0.30072	0.371432	0.0799966	0	0.339304	0.143346	1.03357	0.174396	1.05508	2.25254	0	1.72712	1.45104	0.918629	1.20714	1.19411	0.721454
YCR102C	YCR102C ... YCR102C biological process unknown molecular function unknown cellular component unknown | YCR102W-A	1.1056	1.28564	0.197475	0.184363	-0.191093	0.364342	0	0.0972293	0.947942	-0.321525	-0.0484189	0.519022	0.732439	0	0.885523	0.846021	0.53331	0.969753	1.75671	1.68493
Q0250	Q0250 ... COX2 aerobic respiration* cytochrome-c oxidase activity respiratory chain complex IV (sensu | Q0255	-0.860449	-0.195376	0.421129	0.180973	-0.0415923	-0.0670507	0	-0.982024	-0.181673	-0.570816	-0.543922	-0.72084	-0.745536	0	0.148005	0.162408	1.1182	1.02328	0.542923	0.172003
YLR258W	YLR258W iESR cluster GSY2 glycogen metabolism glycogen (starch) synthase activitycytoplasm | YLR259C	1.01893	0.541779	-0.0371848	0.313588	-0.0238695	-0.337636	0	1.33172	1.33381	0.111721	0.819731	0.800758	0.386153	0	1.62986	1.80632	0.0477772	0.481105	1.45715	1.99803
YOR136W	YOR136W ... IDH2 tricarboxylic acid cycle* isocitrate dehydrogenase (NAD+) actmitochondrion* | YOR137C	0.0655846	0.0262948	0.997851	1.44594	0.0638603	-0.403038	0	0.752727	0.718371	1.0948	1.23743	0.480087	0.181362	0	1.02359	0.87645	0.90061	1.23183	0.387176	0.634879
YER174C	YER174C ... GRX4 response to oxidative stress thiol-disulfide exchange intermediaintracellular | YER175C	-0.902244	-0.272976	-0.543393	-0.638629	-0.944636	-0.437852	0	-0.917347	-0.505018	-1.59987	-0.745897	-1.25811	-1.1541	0	-0.183416	-0.150164	-0.297942	-0.0600691	0.0245193	-0.187751
YNR028W	YNR028W ... CPR8 biological process unknown peptidyl-prolyl cis-trans isomerasevacuole (sensu Fungi) | YNR029C	-0.545772	-0.657865	-0.124722	-0.0541041	-0.627733	-0.714965	0	-0.616032	-0.469778	-0.884119	-0.630263	-0.661278	-0.495825	0	0.0648006	-0.0818072	0.352692	0.385111	0.476108	0.0872621
YJR010W	YJR010W ... MET3 methionine metabolism* sulfate adenylyltransferase (ATP) acytoplasm* | YJR011C	0.467868	0.0147703	-0.309978	0.0160502	-0.0879998	-0.0257258	0	0.732992	0.620103	0.614221	0.735899	1.37819	1.39337	0	0.108993	-0.105636	0.282797	0.621555	1.9791	2.40243
YLR300W	YLR300W ... EXG1 cell wall organization and bio "glucan 1,3-beta-glucosidase activit"cell wall (sensu Fungi) | YLR301W	-0.797458	-0.891035	-1.11195	-1.04835	-0.709877	-1.1057	0	-0.800543	-0.961059	-0.862587	-0.676797	-1.02856	-1.27191	0	0.332262	0.0349885	0.0879632	-0.0542469	-0.603543	-0.633758
YMR055C	YMR055C ... BUB2 mitotic spindle checkpoint GTPase activator activity spindle pole body | YMR056C	-0.473802	-0.588363	-0.702989	-0.784394	-0.193353	-0.785775	0	-0.681213	-0.78826	-1.11002	-1.30265	-0.907045	-1.02827	0	-0.142294	-0.249895	-0.0589523	-0.8615	-0.438843	-0.46923
YPR149W	YPR149W iESR cluster NCE102 protein secretion molecular function unknown cytoplasm* | YPR150W	-0.210457	-0.344279	0.155712	0.280216	-0.480356	-0.299843	0	-0.417157	-0.489922	-0.260401	-0.8461	-0.83747	-1.04785	0	0.633813	0.441895	0.107498	0.0230469	-0.468158	-0.182663
YIL125W	YIL125W ... KGD1 tricarboxylic acid cycle* oxoglutarate dehydrogenase (succinymitochondrial matrix* | YIL126W	-0.313831	-0.395088	-0.461998	-0.0283572	-0.596478	-0.66543	0	-0.28945	-0.263749	-0.224523	0.158777	-0.287885	-0.300964	0	0.481637	0.66612	0.018651	0.565146	0.46089	0.520946
YPL141C	YPL141C ... YPL141C biological process unknown protein kinase activity cytoplasm | YPL142C	-0.378537	0.287902	-0.876756	-0.714004	-0.669047	-0.0935558	0	-1.14698	-0.549073	-1.19162	-1.61992	-0.768047	-0.523838	0	-0.149303	0.0970272	-0.199677	0.107444	0.27754	0.232416
YLL041C	YLL041C ... SDH2 tricarboxylic acid cycle* succinate dehydrogenase (ubiquinonerespiratory chain complex II (sensu | YLL042C	-0.0657629	-0.322254	0.511797	0.00662977	-0.468604	-0.845236	0	-0.12962	-0.15413	-0.553909	-0.478563	-0.648465	-0.901776	0	1.08036	0.74999	0.598615	0.587992	0.248096	0.372414
YBL015W	YBL015W ... ACH1 acetate metabolism* acetyl-CoA hydrolase activity mitochondrion* | YBL016W	-1.02918	-0.843441	-1.19383	-0.727339	-1.18561	-1.26287	0	-0.211424	-0.706847	-2.1534	-1.00765	-1.68639	-1.7424	0	-0.100201	0.0757546	-0.605749	-0.262875	-0.256839	0.422127
YHR001W-A	YHR001W-A ... QCR10 aerobic respiration* ubiquinol-cytochrome-c reductase acmitochondrion* | YHR002W	-0.272313	-0.106663	-0.220953	-0.18981	-0.887378	-0.920248	0	-0.0474047	0.112784	-0.361441	-0.502526	-1.12653	-0.894638	0	0.918631	0.561504	0.788879	0.599106	0.137902	0.320027
YHR177W	YHR177W ... YHR177W biological process unknown molecular function unknown cellular component unknown | YHR178W	-0.731689	-0.414439	-1.25445	-0.99016	-1.52857	-0.60353	0	-0.76067	-0.337328	-0.826448	-0.823452	-0.233494	0.242789	0	-0.574509	-0.32472	0.0901009	-0.416715	-0.584329	-0.015512
YJR015W	YJR015W ... YJR015W biological process unknown molecular function unknown cytoplasm* | YJR016C	0.373851	0.230344	0.229527	1.06892	-1.05737	-0.865364	0	0.245074	0.237066	0.206079	0.187143	-1.37171	-1.08586	0	0.239856	0.24206	0.327766	0.931827	-0.0120813	-0.0464143
YML052W	YML052W ... SUR7 sporulation (sensu Fungi) molecular function unknown mitochondrion* | YML053C	-0.743579	-0.908291	-0.782334	-1.25461	-1.00125	-1.20364	0	-0.666218	-0.92339	-0.771676	-1.50342	-0.92802	-1.73224	0	0.101021	-0.310803	0.00760422	-0.188064	-0.857787	-0.556819
YMR145C	YMR145C ... NDE1 ethanol fermentation* NADH dehydrogenase activity mitochondrion | YMR146C	-1.01969	-0.93213	-1.16052	-0.800474	-0.680807	-0.824562	0	-0.989108	-1.18302	-1.42316	-0.967658	-1.0722	-1.02771	0	0.231126	0.0167814	-1.00395	-0.604259	-0.325386	-0.333116
YOL013W-A	YOL013W-A ... YOL013W-A biological process unknown molecular function unknown cellular component unknown | YOL014W	-0.142718	-0.10701	-1.03015	-1.44242	-1.50304	-1.41993	0	-0.876892	-1.33733	-1.52316	-2.35327	-1.30749	-1.41731	0	0.0745962	-1.45163	-0.288293	-0.73103	-0.155829	-0.249977
YLR038C	YLR038C ... COX12 cytochrome c oxidase complex a cytochrome-c oxidase activity respiratory chain complex IV (sensu | YLR039C	-0.684936	-0.39524	-0.158145	-0.252574	-0.358815	-0.524143	0	-0.384268	0.046072	-0.327963	-0.363921	-0.311026	-0.431868	0	-0.133884	-0.329508	0.533863	0.536464	0.740747	0.3695
YNL037C	YNL037C ... IDH1 tricarboxylic acid cycle* isocitrate dehydrogenase (NAD+) actmitochondrial matrix* | YNL038W	0.235602	0.220169	1.12742	1.34023	0.0150242	-0.339444	0	0.783004	0.737241	1.05339	1.07345	0.399925	0.10756	0	0.939419	0.685333	0.733702	1.22352	0.513683	0.523647
YPR020W	YPR020W ... ATP20 ATP synthesis coupled proton t structural molecule activity proton-transporting ATP synthase co | YPR021C	-0.364905	0.0406753	-0.288764	-0.0133805	-0.332901	-0.453454	0	-0.233977	0.0191604	-0.50861	-0.438747	-0.539422	-0.436702	0	0.109738	0.334404	-0.120574	0.0384329	0.44614	0.223299
YMR090W	YMR090W iESR cluster YMR090W biological process unknown molecular function unknown cytoplasm | YMR091C	0.888161	0.693857	-0.663461	1.04568	0.327038	0.403451	0	0.151677	-0.0312245	-0.548935	0.0967595	0.501822	-0.0601907	0	1.66711	1.5964	-0.460118	0.687394	1.96876	1.41282
YMR013W-A	YMR013W-A ... YMR013W-A biological process unknown molecular function unknown cellular component unknown | YMR014W	-1.59256	-1.4148	0.0849001	-0.533088	-0.434829	-0.313876	0	-0.975702	-1.6936	-0.899485	-0.354734	-0.794367	-0.160127	0	-0.387979	-1.33763	-0.0476348	-0.327993	-0.776217	-0.718215
YIR035C	YIR035C ... YIR035C biological process unknown molecular function unknown cytoplasm | YIR036C	-1.27202	-1.36597	-0.424754	-0.617029	-0.809963	-0.364142	0	-1.10323	-1.38808	-0.481659	-0.696667	-1.03183	-1.23288	0	-0.700955	-1.03452	-0.41837	-0.599884	-0.537834	-0.200321
YOR247W	YOR247W ... SRL1 nucleobase, nucleoside, nucleo molecular function unknown cytoplasm* | YOR248W	-0.140528	-0.603947	-0.576928	-1.01978	-0.511085	-1.2076	0	-0.11952	-1.11072	-0.635395	-0.752692	-0.972136	-1.33314	0	0.384471	-0.380704	0.033604	-0.0164096	-0.234062	-0.228148
YPL274W	YPL274W ... SAM3 S-adenosylmethionine transport S-adenosylmethionine transporter acplasma membrane | YPL277C	-1.72093	-1.68978	-1.29377	-1.24999	-0.443693	-0.38756	0	-1.87795	-1.96501	-1.57299	-1.36904	-0.314635	-0.206024	0	0.3248	0.24094	-0.432542	-0.537312	0.667988	1.02271
YNL274C	YNL274C … iESR cluster GOR1 metabolism "oxidoreductase activity, acti | Glyoxylate reductase; null mutation results in increased biomass after diauxic shift; the authentic, non-tagged protein is detected in highly purified mitochondria in high-throughput studiesYNL275W	0.494083	-0.102416	0.263458	0.528794	0.250802	-0.207385	0	0.31245	1.0511	0.229885	0.824031	0.470113	0.461837	0	0.539495	0.362812	0.801786	1.05277	1.35575	1.61676
YBR244W	YBR244W ... GPX2 response to oxidative stress glutathione peroxidase activity cytoplasm* | YBR245C	-1.63083	-1.57683	-1.64795	-1.51931	-0.77003	-0.907955	0	-0.974338	-0.569167	-0.840398	-0.428942	-0.583575	-0.176469	0	-1.39053	-1.34553	-0.520378	-0.343234	-0.258191	-0.464033
YJR048W	YJR048W ... CYC1 electron transport electron carrier activity mitochondrial intermembrane space | YJR049C	-1.34156	-1.03239	-0.902496	-0.891454	-0.553754	-0.596051	0	-1.10353	-1.04071	-0.715074	-0.393119	-1.04167	-0.944614	0	0.0044548	-0.239711	0.624146	0.737483	0.271659	0.191472
YKR013W	YKR013W ... PRY2 biological process unknown molecular function unknown vacuole (sensu Fungi)* | YKR014C	0.112105	-0.00949387	0.508462	0.988504	0.175602	-0.473405	0	-0.0903977	-0.247534	-0.400828	0.394327	-0.587741	-0.451127	0	0.251017	0.342677	-0.513426	-0.572932	0.155492	0.0948835
Q0275	Q0275 ... COX3 aerobic respiration* cytochrome-c oxidase activity respiratory chain complex IV (sensu | Q0297	-0.223741	0.131806	-0.130007	-0.363382	-0.577079	-0.750089	0	-1.28792	-0.307781	-0.780553	-0.733169	-0.961071	-1.09242	0	0.167502	0.168613	0.21744	0.068947	-0.129579	-0.179417
YGL187C	YGL187C ... COX4 aerobic respiration* cytochrome-c oxidase activity respiratory chain complex IV (sensu | YGL188C	-0.55118	-0.403117	-0.376638	-0.218598	-0.527442	-0.73494	0	-0.39107	-0.237127	-0.660348	-0.337634	-0.646685	-0.716397	0	0.304078	0.00748099	0.033837	0.19064	0.102461	0.088611
YCL064C	YCL064C ... CHA1 threonine catabolism* L-serine ammonia-lyase activity* mitochondrion* | YCL065W	-1.20567	-1.39988	0.315534	0.123192	-0.151815	-0.408011	0	-1.57079	-1.54849	-0.467009	-0.660023	-0.561678	-1.01082	0	0.367507	0.185025	0.376623	0.32181	0.451159	0.1657
YER001W	YER001W ... MNN1 O-linked glycosylation* "alpha-1,3-mannosyltransferase activ"Golgi apparatus | YER002W	0.219238	0.35734	0.229393	0.317983	-0.634193	-0.86876	0	-0.0794732	0.196684	-0.216451	0.451397	-0.174055	-0.0254378	0	0.277952	0.315001	0.70644	1.09991	1.50541	1.25341
YBL002W	YBL002W ... HTB2 chromatin assembly or disassem DNA binding nuclear nucleosome | YBL003C	-0.148246	-0.188445	0.241078	-0.0512701	-0.168238	-0.84808	0	-0.323225	-0.417392	-0.765669	-0.0526391	-0.817538	-0.614433	0	0.203325	-0.331044	0.090519	0.275321	-0.190352	-0.254502
YJL191W	YJL191W RP cluster RPS14B protein biosynthesis* structural constituent of ribosome*cytosolic small ribosomal subunit ( | YJL192C	-1.28092	-1.2044	-0.470059	-0.759407	-1.23639	-1.34025	0	-0.400708	-0.511446	-0.806115	-0.905644	-0.851589	-0.891267	0	-0.385986	-0.886523	-0.444385	-0.689895	-0.846848	-0.856159
YGL191W	YGL191W ... COX13 aerobic respiration enzyme regulator activity* respiratory chain complex IV (sensu | YGL192W	-0.415774	-0.104655	-0.118923	0.194589	-0.258224	-0.626068	0	-0.42656	0.217999	0.123918	0.039044	-0.232125	-0.415646	0	0.0798374	0.360301	0.533273	0.716423	0.626376	0.40644
YHR007C-A	YHR007C-A ... YHR007C-A biological process unknown molecular function unknown cellular component unknown | YHR008C	0.823531	0.96229	0.332058	0.594302	0.34305	0.180534	0	0.60485	0.773958	0.364287	0.747742	0.154611	0.146206	0	0.724575	1.22883	1.17555	1.50588	1.05788	1.43019
YBR203W	YBR203W ... COS111 signal transduction molecular function unknown cellular component unknown | YBR204C	-0.410511	-0.24148	0.275949	0.513115	-0.203028	-0.19899	0	-0.658498	-0.683837	0.245908	0.0481462	-0.639086	-1.05269	0	0.497364	0.436813	-0.116682	-0.0339951	0.132105	0.0881901
YJL047C-A	YJL047C-A ... YJL047C-A biological process unknown molecular function unknown cellular component unknown | YJL048C	-0.767377	-0.630045	0.278213	-0.0212473	-0.34896	-0.224599	0	-0.0321306	-0.445325	-0.663729	0.0785723	-0.11485	-0.273023	0	0.172856	-0.172397	0.622769	0.538056	-0.718377	-0.285601
YMR136W	YMR136W iESR cluster GAT2 transcription transcription factor activity nucleus | YMR137C	0.535123	0.208138	-0.142902	0.330686	0.390047	0.00509182	0	0.130144	-0.44727	-0.999597	0.66981	0.165258	-0.0656328	0	1.19874	1.18179	-0.0126587	2.22404	1.54927	1.56945
YMR011W	YMR011W ... HXT2 hexose transport glucose transporter activity* plasma membrane | YMR012W	-0.834213	-1.17156	-0.589548	-1.02105	-0.799166	-0.961809	0	-1.35545	-1.80118	-1.21979	-0.970985	-0.942018	-0.682046	0	0.532817	-0.0656998	-0.030397	-0.240378	-0.318866	-0.826979
YJR061W	YJR061W ... YJR061W biological process unknown molecular function unknown cellular component unknown | YJR062C	-0.686748	-0.594456	0.109527	0.296197	0.536491	-0.0603313	0	-0.45105	-0.174677	-0.146438	-0.379785	1.02811	0.332481	0	0.668789	0.746689	1.43687	1.57569	2.25921	1.36696
YIL013C	YIL013C ... PDR11 sterol transport "ATPase activity, coupled to transme"membrane | YIL014C-A	-2.18921	-2.16763	-1.2818	-0.882751	-0.511808	-0.559158	0	-1.46296	-1.6796	-0.869961	-0.800491	-1.08885	-0.312611	0	0.339691	-0.140585	-0.75374	-0.459784	-0.895369	-1.26927
YBR093C	YBR093C ... PHO5 phosphate metabolism* acid phosphatase activity cell wall (sensu Fungi)* | YBR094W	0.733052	0.866349	0.804494	1.514	-0.701645	0.392587	0	1.2743	1.23311	1.5178	1.6491	-0.208717	0.205924	0	0.960553	0.920294	1.04284	2.38702	1.19429	1.51249
YDL079C	YDL079C ... MRK1 protein amino acid phosphoryla glycogen synthase kinase 3 activitycellular component unknown | YDL080C	0.187722	0.583757	0.140891	0.212932	0.0640032	0.876463	0	0.436131	0.946338	0.823526	0.360972	0.470113	0.563583	0	0.958295	1.37875	2.16954	1.72079	1.77661	2.59454
YDR529C	YDR529C ... QCR7 aerobic respiration* ubiquinol-cytochrome-c reductase acrespiratory chain complex III (sens | YDR530C	-0.394773	-0.0975724	0.174154	0.0754288	-0.27334	-0.601306	0	-0.532998	-0.07456	-0.226289	-0.30576	-0.57451	-0.679221	0	0.00710071	0.314361	0.256802	0.256031	0.625507	0.228198
YBR092C	YBR092C ... PHO3 phosphate metabolism* acid phosphatase activity periplasmic space (sensu Fungi) | YBR093C	-0.974509	-0.800907	-1.38079	-1.14269	-0.827598	-0.254046	0	-1.66677	-1.62528	-1.49545	-2.3369	-1.13205	-1.39568	0	-0.557086	-0.611491	-0.54504	-0.494836	-0.0735133	-0.0633699
Cluster_9	#N/A	0	0	0	0	0	0	0	0	0	0	0	0	0	0	0	0	0	0	0	0
YFR052C-A	YFR052C-A … Dubious Dubious open reading frame unlikely to encode a functional protein, based on available experimental and comparative sequence dataYGL014C-A	1.63662	0.521021	-1.55099	-1.2465	0	-1.85289	0	1.88864	2.24318	-1.58456	-1.28288	0.222209	-0.0953801	0	3.20105	3.09978	2.30927	0.998323	2.5088	4.75708
YGR234W	YGR234W ... YHB1 response to stress nitric oxide reductase activity cytoplasm* | YGR235C	0.337656	0.41157	-0.179438	0.235787	-2.40993	-1.7085	0	1.46845	1.95008	0.206431	0.475998	0.148185	0.464047	0	2.72025	3.00271	0.171543	0.231994	2.07864	1.38042
YHR092C	YHR092C ... HXT4 hexose transport glucose transporter activity* plasma membrane | YHR093W	0.31205	-0.252519	-4.2931	-5.92457	-3.87227	-4.00064	0	1.64763	0.891837	-4.54906	-4.1536	-2.23616	-3.21512	0	3.95039	2.989	0.950947	0.161553	2.85847	2.18181
YDR342C	YDR342C ... HXT7 hexose transport glucose transporter activity* mitochondrion* | YDR343C	-2.13009	-3.18732	-1.55099	3.3292	-5.06855	-5.82932	0	-0.196246	-1.0286	2.48361	3.3292	-5.90275	-5.01934	0	4.0463	3.2859	-0.0126587	-0.00167735	1.44859	1.45529
YOR032C	YOR032C ... HMS1 pseudohyphal growth transcription factor activity cellular component unknown | YOR032W-A	-1.97809	-2.06394	2.6761	3.93673	-2.40993	-3.07528	0	-2.91871	-1.00475	-0.999597	3.93673	-0.851815	-1.90274	0	2.97866	3.61074	4.68778	6.18815	3.58453	3.71629
YIL119C	YIL119C ... RPI1 thiamin biosynthesis* small GTPase regulator activity nucleus | YIL120W	-0.45084	-0.0639417	0.982751	1.40279	1.40676	1.40192	0	2.14103	2.49001	-0.725422	-0.622787	0.126158	-0.162494	0	2.74586	3.3071	1.86486	1.34186	3.23979	3.2393
YBR054W	YBR054W ... YRO2 biological process unknown molecular function unknown mitochondrion* | YBR055C	0.863215	0.238621	0.0339762	3.60231	0.327038	-0.7825	0	1.60485	1.48067	0.000403	1.62401	0.300188	-1.41731	0	4.7592	4.74594	3.5723	4.16825	2.87219	3.85238
YDR380W	YDR380W iESR cluster ARO10 leucine catabolism* pyruvate decarboxylase activity* cytoplasm | YDR381C-A	5.06289	5.51935	3.53223	3.56221	3.40385	2.054	0	1.67872	1.6833	-1.9996	-0.886955	-0.529887	-1.59788	0	6.30091	6.92194	2.88458	3.58329	5.46407	4.50805
YCR098C	YCR098C ... GIT1 glycerophosphodiester transpor glycerophosphodiester transporter aplasma membrane | YCR099C	-0.0528959	0.415226	0.00649548	0.621397	0.397427	0.364342	0	0.463337	0.678774	0.105373	0.624006	2.17793	1.55997	0	1.43724	2.06437	2.90328	3.68986	4.89011	4.95488
YFR053C	YFR053C iESR cluster HXK1 glucose metabolism* hexokinase activity cytosol | YFR054C	1.57112	1.16167	-2.23733	-1.61645	-2.36102	-2.95868	0	2.00412	1.78315	-1.54392	-1.76831	-0.724903	-0.630219	0	3.20464	3.06556	1.25038	1.82194	2.97198	3.31899
YHR136C	YHR136C ... SPL2 response to temperature enzyme inhibitor activity cytoplasm | YHR137C-A	-0.978087	-1.6489	0.265302	-0.110984	-2.088	-2.58985	0	0.60485	0.58021	0.521236	0.0821127	-0.24038	-0.559327	0	2.289	1.69539	2.47501	2.70212	3.11426	2.04626
YJL116C	YJL116C ... NCA3 mitochondrion organization and molecular function unknown cellular component unknown | YJL117W	2.04371	1.49187	2.10437	2.75993	0.599213	1.00509	0	1.62561	1.13929	0.926403	1.31915	-0.675565	0.332481	0	3.09516	2.92026	2.61961	4.52188	1.75671	2.15441
YEL049W	YEL049W ... PAU2 biological process unknown molecular function unknown cellular component unknown | YEL050C	3.22158	0.466573	-1.79612	-2.01529	-1.58234	-2.33905	0	3.47361	0.912786	-1.82969	-1.05167	0.975771	4.06232	0	1.36455	1.85585	0	1.71496	-0.152672	0
YBR033W	YBR033W ... EDS1 biological process unknown molecular function unknown cellular component unknown | YBR034C	0.767867	0.521021	0.297011	0.0754288	-1.088	-0.142396	0	1.94754	1.61974	-1.32152	-0.545919	0.470113	1.48958	0	2.51139	2.63583	1.25038	1.87279	2.14903	2.59115
YAL063C	YAL063C ... FLO9 flocculation (sensu Saccharomy mannose binding cell wall (sensu Fungi) | YAL063C-A	0.633125	0.177066	0.864051	0.261842	4.94508	0	0	0.381039	-0.184076	0.704948	0.428991	0.88515	-4.61724	0	1.96457	1.57176	1.25482	1.6795	7.29587	1.32061
YHR211W	YHR211W ... FLO5 flocculation (sensu Saccharomy mannose binding cell wall (sensu Fungi) | YHR212C	0.381809	0.0615892	0.712048	0.274333	-0.187536	-0.548035	0	0.22968	-0.294259	0.640001	0.204781	-0.0217402	-0.59788	0	1.80005	2.07331	2.47548	2.15283	5.00464	4.40878
YOR178C	YOR178C ... GAC1 meiosis* protein phosphatase type 1 activityprotein phosphatase type 1 complex | YOR179C	-0.170732	0.936058	0.355904	-1.50953	-1.76607	-2.26793	0	1.47361	3.90214	0.000403	-0.808953	-0.529887	0.0200971	0	4.09636	6.40721	0.987341	0.528837	2.09656	2.68493
YIR019C	YIR019C ... MUC1 pseudohyphal growth* molecular function unknown plasma membrane | YIR020C	0.844454	-0.963469	0.13707	-0.842109	-0.672962	-0.721645	0	0.376249	-1.73144	0.000403	-0.524857	-1.47033	-0.45795	0	4.19463	3.13835	2.36174	5.33608	6.80374	6.53077
YAL065C	YAL065C ... YAL065C biological process unknown molecular function unknown cellular component unknown | YAL066W	0.741805	-0.195186	1.11198	0.797895	-0.0879998	0.732073	0	0.755376	-0.440851	1.0203	0.624006	-0.11485	-1.09538	0	2.56777	1.96853	2.9467	2.8563	6.45715	4.79184
Cluster_10	#N/A	0	0	0	0	0	0	0	0	0	0	0	0	0	0	0	0	0	0	0	0
YML054C	YML054C ... CYB2 electron transport L-lactate dehydrogenase (cytochromemitochondrial intermembrane space | YML054C-A	-1.5473	-1.48797	-2.35834	-1.9752	-1.69466	-2.26793	0	-1.51346	-1.42878	-2.39191	-3.81894	-3.01101	-2.86797	0	0.419206	0.81762	-0.498086	-0.215802	-0.476491	0.118789
YIL169C	YIL169C ... YIL169C biological process unknown molecular function unknown cellular component unknown | YIL171W-A	0.435964	-0.534437	-3.24598	-2.35598	-0.416289	-0.59059	0	-0.326323	-1.35797	-3.40508	-1.85419	-0.731752	-0.973103	0	0.0583054	-0.890127	-1.3113	-1.75774	-1.12432	-1.06392
YKR105C	YKR105C … VBA5 biological process unknown molecular function unknown | Putative transporter of the Major Facilitator Superfamily (MFS); proposed role as a basic amino acid permease based on phylogenyYKR106W	0	0	0	-4.28378	-2.85083	-3.60754	0	0	0	0	-4.32016	-1.29272	-2.85003	0	0	0	0	-4.36088	-1.42116	-1.0332
YIL011W	YIL011W ... TIR3 biological process unknown molecular function unknown cell wall (sensu Fungi) | YIL012W	-4.37155	-4.93677	-5.16896	-5.70331	-4.61156	-5.11258	0	-3.12775	-3.68855	-2.57805	-3.28026	-3.1079	-2.32336	0	-0.424579	-0.84099	-0.515159	-0.830877	-2.57923	-2.05281
YHL008C	YHL008C ... YHL008C biological process unknown transporter activity vacuole (sensu Fungi) | YHL009C	-3.28036	-1.98011	-2.40184	-1.61356	-1.936	-2.21546	0	-2.66155	-2.29015	-2.36013	-2.32532	-2.28477	-1.9758	0	-2.09992	-1.44866	-1.07592	-0.869887	-1.41322	-1.65492
YFR032C	YFR032C … RRT5 biological process unknown molecular function unknown | Putative protein of unknown function; non-essential gene identified in a screen for mutants with increased levels of rDNA transcription; expressed at high levels during sporulationYFR032C-A	-3.72532	-2.16828	-1.82852	-1.44813	-1.28064	-2.19754	0	-2.20651	-1.73058	-1.9996	-2.16259	-1.30749	-1.83235	0	-0.71199	-0.519132	0.280123	-0.227559	0.400564	-0.782851
YPL027W	YPL027W ... SMA1 spore wall assembly (sensu Fun molecular function unknown cellular component unknown | YPL028W	-1.75569	-3.52337	0.268781	-2.50953	-0.651932	-2.58985	0	-1.69632	-2.46418	-0.999597	-1.54592	-0.651932	-4.00227	0	-1.61273	-0.681582	0.402379	0.500823	-1.09129	-1.33744
YDR222W	YDR222W ... YDR222W biological process unknown molecular function unknown cytoplasm | YDR223W	-0.603048	-0.470297	-0.583617	-0.287141	-0.965664	-0.653477	0	-1.85694	-1.57815	-2.18109	-1.48399	-2.07705	-1.86028	0	-1.98712	-2.23674	-1.2474	-0.864941	-1.75969	-1.62624
YEL018C-A	YEL018C-A … Dubious Dubious open reading frame unlikely to encode a functional protein, based on available experimental and comparative sequence dataYEL020C-B	-3.41866	-1.85342	-1.31348	-2.62501	-2.40993	-3.20653	0	-4.35928	-4.00475	-3.70004	-1.05285	-1.43678	-3.61894	0	-0.990291	-0.637188	-0.713098	0.54581	0.43478	-1.53907
YDR038C	YDR038C ... ENA5 sodium ion transport "ATPase activity, coupled to transme"plasma membrane | YDR039C	-1.17073	3.17864	-3.48959	-3.73193	-2.54743	-3.54095	0	-0.111357	-0.00475225	-1.7158	0.319152	-1.98932	-0.705434	0	-0.120875	0.77785	-2.53622	-1.22407	-4.70272	-2.55156
YMR317W	YMR317W ... YMR317W biological process unknown molecular function unknown cellular component unknown | YMR318C	-3.02871	-3.81883	0.696941	1.84802	-2.82497	-2.49032	0	-3.38438	-3.17468	0.322332	-0.591722	-1.43678	-0.995844	0	-2.30078	-1.07015	-0.860656	-1.06308	-1.24329	-1.36344
YDR119W-A	YDR119W-A YDR119W-A YDR374W-A	-1.99925	-2.13169	-1.34461	-0.661537	-3.89535	-3.31232	0	-1.84366	-1.48753	-2.32152	-1.28288	-1.9222	-4.13977	0	0.963454	0.209338	1.83534	-1.08398	0.993747	0.747449
YBR190W	YBR190W ... | YBR191W	-2.16791	-1.79864	-1.55099	-1.85057	-3.99489	-2.63716	0	-2.11136	-1.79864	-3.16952	-2.37563	-2.02174	-4.04958	0	0.220162	0.607925	0.624771	0.209827	-0.690751	-1.26927
YDR040C	YDR040C ... ENA1 sodium ion transport "ATPase activity, coupled to transme"plasma membrane | YDR041W	-1.97809	-2.6489	-1.18842	-1.30308	-3.82947	-3.95443	0	-2.91871	-3.58971	-0.999597	-0.0764332	-1.81192	-0.652598	0	-0.442803	-1.48518	-1.49809	-0.532192	-2.98476	-2.34446
YBR296C	YBR296C ... PHO89 phosphate transport sodium:inorganic phosphate symporteplasma membrane | YBR296C-A	-5.11807	-5.44505	-1.02047	-1.54906	-3.13239	-1.88264	0	-0.813001	-1.62298	-0.754484	-0.848481	-0.989319	-0.622627	0	-1.6767	-2.83773	-1.59762	-1.62617	-1.11776	-2.30829
YHR094C	YHR094C ... HXT1 hexose transport glucose transporter activity* plasma membrane | YHR095W	-2.57127	-2.36241	-1.86219	-2.73816	0.491514	0.058548	0	-2.54104	-3.16995	-0.0306903	-0.370477	-0.0825835	-0.707505	0	-5.31727	-5.30489	-3.97921	-4.44462	-3.78917	-4.0011
YPL130W	YPL130W ... SPO19 meiosis molecular function unknown cell wall (sensu Fungi) | YPL131W	-3.02871	-4.1514	-2.6441	-3.19759	-2.31039	-3.35539	0	-3.38438	-3.50725	-3.41463	-3.01158	-2.9222	-3.01292	0	-0.25639	-0.609173	0.54193	0.269625	1.03682	-1.24499
YER097W	YER097W ... | YER098W	-2.61131	-3.10834	-2.77338	-1.62501	-1.63053	-3.13734	0	-2.18936	-1.58971	-2.39191	-2.33947	-4.18094	-4.08027	0	0.375359	0.257018	1.11859	1.18053	-0.139456	-0.015512
YKL096W	YKL096W ... CWP1 cell wall organization and bio structural constituent of cell wallcell wall (sensu Fungi) | YKL096W-A	-0.992072	-1.22018	-1.15074	-1.31612	-1.43298	-1.84569	0	-2.12534	-2.20893	-1.82174	-1.74312	-2.36204	-3.15427	0	-0.897025	-0.771592	-1.30429	-1.18282	-0.687135	-0.261337
YLR237W	YLR237W ... THI7 thiamin transport thiamin transporter activity plasma membrane | YLR238W	-2.83724	-2.78269	-2.07336	-2.35737	-1.64239	-1.73381	0	-1.9646	-1.76798	-1.91004	-2.82057	-1.81488	-2.22353	0	0.506242	0.269032	-0.317513	-0.405086	0.222484	-0.064787
YIL121W	YIL121W ... QDR2 multidrug transport multidrug efflux pump activity integral to plasma membrane | YIL122W	-1.68531	-3.12284	-2.48387	-2.19179	-1.89535	-1.39346	0	-1.62593	-3.64861	-3.47438	-2.56698	-2.18524	-2.68034	0	-1.06429	-0.473689	-0.346082	-0.219431	-1.17618	0.0999652
YMR141C	YMR141C ... | YMR142C	-1.75569	-2.10208	-1.39898	-1.71598	-1.014	-1.67003	0	-1.37439	-1.14226	-4.75448	-2.45281	-1.36278	-1.60439	0	-0.327326	-1.09662	-0.308115	-0.635549	-0.169292	-0.224965
YLL052C	YLL052C ... AQY2 water transport water channel activity plasma membrane* | YLL053C	-2.38575	-2.14547	-1.37041	-1.49665	-0.506404	0.325522	0	-1.86071	-1.78463	-1.12222	-1.71746	-1.18726	-1.07636	0	-2.88021	-3.14498	-0.731922	-1.65283	-3.3157	-3.0028
YOL155C	YOL155C … HPF1 cell wall organization and bio glucosidase activity | Haze-protective mannoprotein that reduces the particle size of aggregated proteins in white winesYOL155W-A	-0.420073	-1.26608	-1.541	-2.09626	-0.0862333	-0.636292	0	-1.03555	-2.18546	-2.16949	-1.82625	-0.821833	-1.27907	0	-0.690633	-1.76752	-1.22928	-0.979472	-0.985322	-0.774706
YOR028C	YOR028C ... CIN5 regulation of transcription fr DNA binding* nucleus | YOR029W	-1.30824	-0.549368	-2.38106	-2.92457	-3.99489	-3.03844	0	-2.57079	-0.812107	-1.9996	-1.37599	-3.28477	-3.14601	0	2.07505	4.02578	-0.842734	1.24625	0.0977447	0.0453703
YLL053C	YLL053C ... YLL053C biological process unknown molecular function unknown cellular component unknown | YLL054C	-1.87293	-2.37914	-1.50106	-1.93922	-0.594279	0.207286	0	-2.33141	-2.53677	-1.12698	-1.16405	-1.37659	-1.42624	0	-2.39436	-3.71569	-0.44816	-1.36425	-3.40034	-3.25103
YLL046C	YLL046C ... RNP1 ribosome biogenesis and assemb RNA binding cytoplasm | YLL047W	-1.49266	-3.52337	-1.0815	-1.79904	-0.310392	-1.52168	0	-2.43329	-3.46418	-1.11507	-2.198	-0.922205	-1.59014	0	-0.442803	-0.359654	0.0942565	0.163382	0.856243	-0.446146
YOR273C	YOR273C ... TPO4 polyamine transport spermine transporter activity* plasma membrane* | YOR274W	-1.87117	-1.56183	-1.61431	-1.61178	-2.13239	-2.2647	0	-3.13206	-2.86043	-2.1004	-2.10455	-4.22064	-4.65158	0	-1.84014	-1.69052	-1.0946	-0.617337	-2.7229	-1.99946
YOR161C	YOR161C iESR cluster PNS1 biological process unknown molecular function unknown* integral to plasma membrane | YOR161C-C	-2.25299	-2.6955	-2.27345	-2.68538	-1.98707	-2.177	0	-1.95034	-2.20498	-2.62895	-2.49938	-2.50913	-2.59352	0	-1.82689	-1.48025	-2.32009	-1.61049	-2.457	-2.07114
Cluster_11	#N/A	0	0	0	0	0	0	0	0	0	0	0	0	0	0	0	0	0	0	0	0
YER137W-A	YER137W-A … Dubious Dubious open reading frame unlikely to encode a functional protein, based on available experimental and comparative sequence dataYER138C	1.38904	0	1.58365	-0.509534	-1.07402	-1.85289	0	1.38904	0	1.58365	0.259318	-1.07402	-0.760278	0	1.14216	-0.565422	-0.0126587	-0.00167735	-2.56522	-1.60047
YDR133C	YDR133C ... | YDR135C	-1.41509	-0.787006	0.0992677	-0.466801	-0.918787	-1.15198	0	-1.09915	-0.862359	-1.36217	-1.09481	-1.20071	-1.43792	0	1.1007	1.51062	1.14235	0.930556	0.512782	0.93452
YAL037W	YAL037W ... YAL037W biological process unknown molecular function unknown cellular component unknown | YAL038W	-1.28621	-0.478979	-0.081501	-0.619717	-1.50304	-1.07528	0	0.046184	0.627516	-0.530111	-0.656101	-0.11485	-0.639701	0	-0.143243	-0.151761	0.534829	0.793503	0.216139	-0.286814
YHR210C	YHR210C ... YHR210C biological process unknown molecular function unknown cellular component unknown | YHR211W	-0.929724	-0.755819	-1.31966	-0.676644	-2.40993	-2.58985	0	-0.322861	-0.589715	-1.9382	-0.873493	-1.85182	-1.2798	0	-0.147347	-0.36654	-1.21429	-0.478115	2.38898	1.53046
YPR150W	YPR150W iESR cluster | YPR151C	-0.848804	-1.54937	0.185979	-1.384	-0.962469	-1.58985	0	-0.526395	0.187893	0.415441	0.90154	-0.252353	-1.19492	0	0.557197	-1.70758	0.139344	0.626354	-0.380796	-1.33744
YAR075W	YAR075W PAC cluster YAR075W biological process unknown molecular function unknown cellular component unknown | YBL001C	2.0204	0	0	0	-0.442669	-2.85289	0	2.0204	0	0	0	-1.43678	-1.09538	0	2.0204	0	0	0	-2.56522	-2.60047
YJL108C	YJL108C ... PRM10 conjugation with cellular fusi molecular function unknown integral to membrane | YJL109C	0.347399	-0.180755	-1.17084	-0.924571	-1.8746	-1.70963	0	-0.321924	-0.474238	-0.204416	0.0770118	-2.36539	-1.55878	0	-0.975298	-1.28774	-1.74257	-1.42314	-2.65138	-1.76842
YDL187C	YDL187C ... | YDL188C	-0.270268	-0.676919	-0.081501	-0.863171	-2.40993	-0.557433	0	-0.111357	-0.383264	0.000403	-1.67716	-1.11485	-0.0312498	0	0.235269	-0.530273	0.374364	0.0597232	-1.24329	-0.305019
YEL053W-A	YEL053W-A … Dubious Dubious open reading frame unlikely to encode a protein, based on available experimental and comparative sequence data; partially overlaps the verified gene YEL054CYEL077W-A	-0.393125	-0.648904	-2.18842	-0.339609	-0.935997	0.2175	0	0.403216	1.58021	-0.34752	-1.1536	-1.28477	-2.41731	0	0.656733	1.36281	-0.119574	-0.542246	-0.605862	-0.600474
YHR216W	YHR216W PAC cluster IMD2 GTP biosynthesis IMP dehydrogenase activity cytoplasm | YHR217C	-0.852836	-0.844773	-0.49817	-1.06753	-1.088	-3.3834	0	0.664012	0.3528	0.932823	0.387939	-1.69981	-1.33639	0	0.264331	0.0305152	-1.02741	-0.714647	-1.24329	-2.71595
YDL181W	YDL181W ... INH1 ATP synthesis coupled proton t enzyme inhibitor activity proton-transporting ATP synthase co | YDL182W	-1.20522	-1.9067	-1.44756	-1.16558	-1.787	-1.94463	0	-1.12276	-1.61619	-2.20905	-1.46875	-1.75871	-2.5127	0	1.3433	1.02255	0.13544	0.297883	0.559108	0.804485
YAR066W	YAR066W ... YAR066W biological process unknown molecular function unknown cellular component unknown | YAR068W	0	0	0	0	-2.99489	-2.51585	0	0	0	-0.58325	-2.80524	-1.43678	-0.436417	0	0	0	0	0	-3.15018	-3.26344
YGL037C	YGL037C iESR cluster PNC1 chromatin silencing at telomer nicotinamidase activity cytoplasm* | YGL038C	0.0624667	0.154798	-1.04716	-0.331996	-1.04923	-1.78927	0	0.225678	0.872036	-0.422168	0.12246	-0.616648	-1.3622	0	0.294163	0.77785	0.225746	0.606005	0.0341716	0.44435
YGL263W	YGL263W ... COS12 biological process unknown molecular function unknown cellular component unknown | YGR001C	-0.918925	-1.19811	-1.43995	-2.44813	-1.6645	-1.53199	0	0.254192	0.0921816	0.231016	0.000909	-0.593503	-0.441904	0	0.264331	-0.273174	-0.383496	-0.580381	-0.819793	-0.666123
YDR516C	YDR516C iESR cluster EMI2 sporulation (sensu Fungi) molecular function unknown cytoplasm | YDR517W	-0.273826	-0.227077	-0.811853	-1.29178	-2.46814	-2.65553	0	0.905131	1.02221	-0.0325111	-0.297138	-0.699812	-0.979322	0	0.842174	1.21985	0.051	0.0224351	0.231617	0.685509
YDR343C	YDR343C ... HXT6 hexose transport glucose transporter activity* mitochondrion* | YDR344C	0.41423	0.158451	-0.814021	-1.66154	-3.72359	-4.16517	0	-0.62593	1.21764	-1.58456	-0.475529	-2.85735	-4.50719	0	0.235269	1.89333	-0.597621	0.376834	1.56169	1.55322
YHL028W	YHL028W ... WSC4 cell wall organization and bio transmembrane receptor activity endoplasmic reticulum membrane* | YHL029C	0.584155	1.15845	-1.70299	-0.172499	-1.83802	-1.71539	0	0.0585677	0.912786	-0.862093	-0.886955	-1.51695	-1.19492	0	1.82398	2.56212	2.29477	1.94022	0.0391075	1.24752
YNR056C	YNR056C ... BIO5 biotin biosynthesis* permease activity plasma membrane | YNR057C	-1.17073	-0.701372	-0.381061	-2.50953	-2.088	-3.26793	0	-1.304	-1.00475	2.04565	-0.960956	-0.792922	-0.635949	0	0.201053	-0.329065	-0.0126587	0.220715	0.0786359	-1.01551
YML100W	YML100W iESR cluster TSL1 response to stress* enzyme regulator activity "alpha,alpha-trehalose-phosphate syn" | YML100W-A	1.74727	0.95712	-1.42546	-1.37914	-1.47025	-1.69302	0	1.81506	1.69177	-0.801309	-0.735781	-1.06594	-1.14896	0	1.35885	2.10317	-1.43525	-0.972726	-0.650062	0.819486
YHR214W-A	YHR214W-A | YHR215W	0	0	0	0	-2.18111	-2.23622	0	0	0	0	0	-1.02739	-1.26531	0	0	0	0	0	-3.65833	-2.9224
YOR364W	YOR364W ... | YOR365C	-0.978087	-0.911939	0.0339762	-1.62501	-1.67296	-0.7825	0	-0.33375	-0.852749	0.853743	-1.07643	-2.69981	-1.22715	0	-1.25016	-1.07015	1.7947	-1.38019	-0.828255	-0.752478
YBR240C	YBR240C ... THI2 positive regulation of transcr transcriptional activator activity nucleus | YBR241C	-1.17073	-0.456259	-2.85911	-3.01203	-2.40993	-0.727358	0	-0.374392	0.460911	-0.999597	-0.800491	-0.629423	0.145628	0	0.0166286	0.429926	-1.18954	-0.565578	-0.56522	0.431947
YMR081C	YMR081C iESR cluster ISF1 aerobic respiration molecular function unknown cellular component unknown | YMR082C	-0.170732	-0.742014	-2.28795	-0.246499	-2.89535	-2.72736	0	1.11104	0.165173	-0.736562	-1.28288	-0.600276	-1.74746	0	0.879125	0.585205	-0.0126587	0.676395	0.649793	0.332411
YIL113W	YIL113W iESR cluster SDP1 MAPKKK cascade during cell wal MAP kinase phosphatase activity cytoplasm* | YIL114C	0.28178	-0.157051	-0.892023	0.423352	-0.740077	-0.930892	0	-0.452394	-0.197397	-1.66256	-1.42039	-1.25235	-2.75835	0	-0.105768	-0.31526	-1.45323	1.18275	-0.532799	-0.678477
YOL106W	YOL106W ... | YOL107W	0.481344	-0.148831	0.686053	-0.234911	-0.457234	-0.523184	0	0.210571	0.113892	0.65248	-0.160265	-1.74712	-0.719871	0	-0.00223045	-0.22215	1.34991	-0.785949	-0.553632	-0.318075
YCR021C	YCR021C ... HSP30 response to stress molecular function unknown plasma membrane | YCR022C	0.755267	0.142509	-0.506592	-0.625011	-0.935997	-1.10746	0	0.37407	0.294808	0.0878663	-0.854041	-1.1693	-0.659281	0	0.6947	-0.600662	1.30927	1.72415	0.00182029	0.481988
YMR251W-A	YMR251W-A iESR cluster HOR7 response to stress molecular function unknown endoplasmic reticulum* | YMR252C	0.60211	0.184469	-1.00286	-0.504567	-1.9	-1.73376	0	0.310798	0.27238	0.305258	0.0190062	-0.82731	-0.814198	0	1.4627	1.34121	1.10375	0.71928	0.556541	0.943742
YFR015C	YFR015C ... GSY1 glycogen metabolism glycogen (starch) synthase activitycytoplasm* | YFR016C	-0.399001	-0.583316	-1.2529	-2.035	-1.76607	-2.0538	0	0.59718	0.656446	-1.17545	-1.36089	-0.359962	-0.832346	0	1.5572	1.92144	-0.0365054	-0.527139	0.311297	0.607418
YGR230W	YGR230W ... BNS1 meiosis molecular function unknown cellular component unknown | YGR231C	-0.244733	0.337421	1.18082	0.478784	-1.97553	-1.38657	0	0.0902766	0.0746822	0.440976	-0.160265	-1.86487	-1.34331	0	-0.395497	-0.523806	0.823843	-0.200986	0.795182	0.336473
YHR087W	YHR087W … iESR cluster RTC3 RNA metabolism molecular function unknown | Protein of unknown function involved in RNA metabolism; has structural similarity to SBDS, the human protein mutated in Shwachman-Diamond Syndrome (the yeast SBDS ortholog = SDO1); null mutation suppresses cdc13-1 temperature sensitivityYHR088W	1.03572	1.39549	-0.644096	-0.602643	-2.62405	-3.60778	0	1.96956	2.03964	-1.41463	-1.63903	-2.16548	-2.26531	0	0.611645	2.20411	-0.842734	0.856304	-0.931348	-0.401166
YJL107C	YJL107C ... YJL107C biological process unknown molecular function unknown cellular component unknown | YJL108C	-0.0394879	0.415668	-1.94064	-0.975197	-1.2223	-1.34235	0	-0.73814	-0.399612	-0.367053	-0.200027	-1.65251	-1.42945	0	-1.9476	-1.12397	-1.55556	-1.55849	-1.44974	-0.991533
YIL111W	YIL111W ... COX5B mitochondrial electron transpo cytochrome-c oxidase activity respiratory chain complex IV (sensu | YIL112W	1.27405	1.25799	1.42629	0.385769	-0.602573	-0.884598	0	0.362574	-0.376721	1.45984	-0.282884	-2.43678	-0.618942	0	0.431666	0.405881	1.89423	0.780731	0.720182	0.161366
YJL196C	YJL196C ... ELO1 fatty acid elongation, unsatur fatty acid elongase activity membrane | YJL197W	1.4957	1.29301	0.386154	-0.608357	-1.054	-0.66144	0	1.58628	1.46327	0.0480699	-0.321898	-1.1591	-1.01356	0	0.232564	-0.0295052	0.489184	0.519155	-0.899963	-0.279312
YJL218W	YJL218W ... YJL218W biological process unknown acetyltransferase activity cellular component unknown | YJL219W	-0.737773	-0.22744	0	0	-1.44164	-2.33021	0	-0.732846	-0.227145	0	0	-2.05345	-2.15766	0	-0.555278	0.0997778	0	0	0.0405008	-0.211063
YHR033W	YHR033W ... YHR033W biological process unknown molecular function unknown cytoplasm | YHR034C	-0.126338	0.673024	0.297011	-1.14696	-2.25792	-3.96837	0	-0.587795	-0.490179	-2.32152	-1.76831	0.133474	0.17974	0	1.18655	1.63346	1.25038	0.650399	0.756708	0.927904
YEL039C	YEL039C iESR cluster CYC7 electron transport electron carrier activity mitochondrial intermembrane space | YEL040W	0.550552	1.87466	-1.15867	0.227432	-2.088	-1.82221	0	0.233778	1.03478	-0.414634	-0.808953	-2.11485	-2.90274	0	1.21811	2.68474	0.0748042	1.41336	0.756708	1.2646
YGL152C	YGL152C ... | YGL153W	-1.01873	-0.648904	-1.38106	-0.246499	0.0737294	-2.3834	0	-1.28128	-0.852749	-1.41463	-2.28288	-0.851815	-2.21086	0	0.7092	0.192887	-1.01266	-0.323605	-0.56522	-0.715952
Cluster_12	#N/A	0	0	0	0	0	0	0	0	0	0	0	0	0	0	0	0	0	0	0	0
YDR506C	YDR506C ... YDR506C biological process unknown molecular function unknown cellular component unknown | YDR507C	1.6425	1.81576	2.59197	1.92343	1.4622	2.49107	0	1.89891	2.19688	3.5584	2.4853	1.91069	3.4803	0	1.50473	1.90218	2.88351	2.52188	1.92663	3.33933
YGR254W	YGR254W ... ENO1 glycolysis* phosphopyruvate hydratase activity cytoplasm* | YGR255C	1.8107	1.22963	1.57344	1.33956	0.827702	0.641641	0	2.35457	2.11691	3.13582	1.9584	1.98062	1.26486	0	1.4563	1.48489	2.53747	2.26309	1.34264	1.71674
YOR317W	YOR317W iESR cluster FAA1 lipid metabolism* long-chain-fatty-acid-CoA ligase acmitochondrion* | YOR318C	1.69986	1.7052	1.703	1.96628	1.44678	1.17909	0	1.16953	1.3233	1.37336	1.63663	0.89539	0.822027	0	2.48453	2.85771	1.56346	2.75825	1.59715	1.89064
YBR297W	YBR297W ... MAL33 regulation of transcription, D transcription factor activity nucleus | YBR298C	1.7657	1.78691	1.23833	1.24077	0.818891	0.317036	0	2.20059	1.58021	1.82262	1.74265	1.27747	1.31966	0	3.00755	2.61435	1.24514	1.18192	1.92663	1.92309
YNL015W	YNL015W iESR cluster PBI2 vacuole fusion, non-autophagic endopeptidase inhibitor activity cytoplasm* | YNL016W	1.67597	1.06895	1.74822	2.22905	1.41724	1.14711	0	1.41018	1.69374	1.73511	1.58012	1.72537	1.04494	0	1.31036	1.47634	2.18701	2.50558	2.9058	2.30642
YDL048C	YDL048C ... STP4 biological process unknown molecular function unknown cytoplasm* | YDL049C	1.27451	1.02798	1.25188	1.5384	2.40385	1.49289	0	1.5942	1.11364	1.65675	1.94853	2.377	1.54205	0	1.60629	1.55229	1.32176	1.89739	2.86523	2.16329
YML131W	YML131W iESR cluster YML131W biological process unknown molecular function unknown cytoplasm | YML132W	1.94901	1.49549	1.78362	2.22559	1.82627	1.89793	0	0.902449	0.848858	0.42601	0.638653	0.197535	0.301279	0	1.76365	1.18336	1.26911	1.38924	1.49684	1.48806
YNL134C	YNL134C iESR cluster YNL134C biological process unknown alcohol dehydrogenase (NADP+) activcytoplasm* | YNL135C	2.91887	2.78022	1.5372	1.9819	1.9971	2.05281	0	2.39364	2.63591	1.28769	1.20967	1.83676	1.82496	0	2.07177	2.18288	1.63997	1.95968	2.30617	2.39205
YKR076W	YKR076W iESR cluster ECM4 cell wall organization and bio molecular function unknown cytoplasm | YKR077W	3.11394	2.9323	2.49341	2.58178	1.45257	1.50146	0	2.75149	2.83655	2.5029	2.17953	1.98031	1.87145	0	1.74896	1.98079	1.46127	1.42153	2.50673	1.88261
YCL049C	YCL049C ... YCL049C biological process unknown molecular function unknown membrane fraction | YCL050C	1.77867	1.7274	2.97739	3.30573	1.79504	2.58855	0	1.24612	1.29858	3.0004	2.90846	2.11932	2.6804	0	1.32385	0.979622	2.45683	2.46781	1.68395	2.4077
YDR277C	YDR277C ... MTH1 signal transduction* molecular function unknown cellular component unknown | YDR278C	1.08302	1.70658	1.5783	1.33846	1.95382	0.880172	0	1.25429	2.3001	1.51698	1.32855	1.93724	1.23433	0	2.8283	3.19023	1.98734	2.25466	2.91242	2.09696
YDR009W	YDR009W ... GAL3 regulation of transcription, D protein binding cytoplasm | YDR010C	1.08452	1.37966	1.421	2.10785	2.43556	1.46904	0	1.08419	1.32867	1.42925	2.16457	2.31142	2.00416	0	0.97804	1.49155	1.41618	2.56126	2.56406	2.19208
YKL103C	YKL103C iESR cluster LAP4 vacuolar protein catabolism aminopeptidase I activity vacuole (sensu Fungi) | YKL104C	2.25485	2.36037	1.03398	1.61524	0.807303	0.357678	0	1.6355	2.30032	1.77467	1.49295	1.14818	0.700149	0	1.48688	2.07537	1.05991	1.33712	2.58859	2.08882
YKL218C	YKL218C ... SRY1 amino acid derivative cataboli threo-3-hydroxyaspartate ammonia-lycellular component unknown | YKL219W	1.87366	1.10598	1.59691	1.46775	1.10465	1.95447	0	2.24619	1.8026	2.91601	3.03151	3.30661	3.43513	0	1.20105	0.77785	1.22835	1.27134	1.85624	2.62192
YFL052W	YFL052W ... YFL052W biological process unknown DNA binding cellular component unknown | YFL053W	2.2887	1.38352	1.67783	0.968514	1.21685	0.558044	0	2.84284	1.97876	1.24833	1.75525	1.47011	1.44519	0	3.87913	2.79415	2.5109	2.4389	1.4506	2.15441
YER098W	YER098W ... UBP9 protein deubiquitination ubiquitin-specific protease activitcytoplasm | YER099C	0.937071	1.73515	1.22085	1.53264	0.786469	0.623549	0	0.812021	1.82712	1.61574	1.79303	1.34458	0.925378	0	0.544706	1.52631	0.987341	1.57511	2.13753	1.49802
YHR071W	YHR071W ... PCL5 cell cycle cyclin-dependent protein kinase regcyclin-dependent protein kinase hol | YHR072W	1.60511	1.99345	0.983742	1.36327	0.859533	0.993659	0	1.54678	2.05039	2.01812	1.45865	1.64258	1.43045	0	2.05264	2.44328	0.935686	1.52771	1.88009	1.80421
YER045C	YER045C ... ACA1 transcription initiation from specific RNA polymerase II transcrinucleus | YER046W	1.52971	1.60591	1.7147	1.63342	0.704195	0.639815	0	1.79553	1.83594	1.37237	1.52733	1.15696	0.954806	0	2.62708	2.6547	2.05975	2.15483	2.14735	1.30386
YOL084W	YOL084W iESR cluster PHM7 biological process unknown molecular function unknown vacuole (sensu Fungi) | YOL085C	0.938892	1.20908	2.78121	2.52021	1.37143	1.53943	0	0.498696	1.31718	1.89349	0.956582	1.62212	0.767116	0	0.701587	1.86531	2.08688	1.99832	1.34167	1.19748
YPR002W	YPR002W ... PDH1 propionate metabolism molecular function unknown cytoplasm* | YPR003C	0.394865	0.732525	2.39655	2.0874	1.78076	2.0241	0	0.859496	1.36203	2.67418	2.30208	1.60952	1.91384	0	0.641261	0.887474	1.88043	2.57525	0.877002	1.32844
YGL156W	YGL156W iESR cluster AMS1 carbohydrate metabolism alpha-mannosidase activity vacuolar membrane | YGL157W	2.15745	2.05154	2.98817	2.95995	1.38593	1.4895	0	2.00894	2.38548	1.9546	1.50853	1.86497	2.17764	0	1.06706	1.8524	2.11662	2.07924	1.63118	1.75204
Cluster_13	#N/A	0	0	0	0	0	0	0	0	0	0	0	0	0	0	0	0	0	0	0	0
YKL029C	YKL029C ... MAE1 pyruvate metabolism* malate dehydrogenase (oxaloacetate-mitochondrion | YKL030W	0.819511	1.08053	-0.39447	-0.739568	0.768373	0.691121	0	0.51256	0.439087	-0.604391	0.161342	0.855328	0.359479	0	0.621596	0.989225	-0.692023	-0.744857	0.429722	0.122855
YGL096W	YGL096W iESR cluster TOS8 G1/S-specific transcription in transcription factor activity nucleus | YGL097W	0.294931	0.225565	-1.05566	-0.738158	0.397427	-0.412317	0	1.27768	1.31718	-1.73078	-0.936294	1.81115	0.797705	0	1.04752	1.33585	-1.13977	-0.905462	2.13522	1.29261
YHL021C	YHL021C … iESR cluster AIM17 biological process unknown molecular function unknown mitochondrion | Putative protein of unknown function; the authentic, non-tagged protein is detected in highly purified mitochondria in high-throughput studies; null mutant displays reduced frequency of mitochondrial genome lossYHL022C	1.30375	0.829143	-0.345612	0.277063	-0.716906	-0.279242	0	1.51013	1.05463	0.153483	0.472003	-0.389472	0.00790769	0	1.6083	1.38288	-0.284332	0.210373	-0.16833	0.580678
YOR083W	YOR083W ... WHI5 G1/S transition of mitotic cel transcriptional repressor activity cytoplasm* | YOR084W	0.308435	1.42149	-1.05349	-0.661537	0.61244	-0.267927	0	-0.0682886	-1.00475	-0.765131	-1.16741	0.0550754	-0.680343	0	-0.165269	1.41012	-0.292767	0.676395	1.75671	0.902026
YPR160W	YPR160W ... GPH1 glycogen catabolism glycogen phosphorylase activity cytoplasm | YPR161C	0.224127	-1.39515	-1.28795	-0.872104	-0.213531	-0.80398	0	1.2527	0.75424	-0.473528	-0.908489	0.107543	0.332041	0	2.09693	2.26063	-0.264197	0.600987	1.63118	1.93386
YFR055W	YFR055W … IRC7 sulfur metabolism* cystathionine beta-lyase activ | Putative cystathionine beta-lyase; involved in copper ion homeostasis and sulfur metabolism; null mutant displays increased levels of spontaneous Rad52p foci; expression induced by nitrogen limitation in a GLN3, GAT1-dependent mannerYFR056C	0.584281	0.368898	-0.639169	-0.0308016	-0.392006	-0.0671643	0	0.456532	0.377717	-1.70189	-0.715844	-0.25488	0.0767695	0	0.410371	0.0737826	-1.90951	-0.440661	-0.324906	-0.171417
YDR157W	YDR157W ... | YDR158W	-0.526876	1.01406	-0.966024	-2.44813	0.283969	-0.374842	0	-0.587795	0.147251	-1.70004	-0.314593	-0.11485	-0.580807	0	0.579565	0.514815	0.60883	-0.8248	0.313101	0.347058
YKL182W	YKL182W ... FAS1 fatty acid biosynthesis [acyl-carrier protein] S-malonyltramitochondrion* | YKL183C-A	0.889263	0.669328	-0.525061	-0.429863	-0.306319	0.20861	0	0.632392	0.519932	-0.217961	0.0372423	-0.229609	0.0127827	0	0.367099	0.369197	-0.393616	-0.189281	-0.0818371	0.0797391
YER018C	YER018C ... SPC25 chromosome segregation* structural constituent of cytoskelecondensed nuclear chromosome kineto | YER019C-A	0.817952	0.0429735	-0.457877	-1.22413	0.4095	-0.0455343	0	0.63011	0.849397	-2.68409	-1.96096	-0.295422	-0.358415	0	0.142159	0.832298	-0.0450802	-0.24679	0.991173	2.20688
YDL241W	YDL241W ... YDL241W biological process unknown molecular function unknown cellular component unknown | YDL242W	0.391146	0.768948	-0.649167	-1.53755	-0.766072	-0.474378	0	0.705779	1.43819	0.0623312	-0.117075	0.529007	0.641585	0	0.672674	0.800218	0.847938	0.872792	0.687445	0.381378
YNR016C	YNR016C ... ACC1 protein-nucleus import* acetyl-CoA carboxylase activity* mitochondrion* | YNR017W	1.18148	0.937049	-0.320029	-0.407063	-0.174125	0.332108	0	0.90983	0.776989	-0.171304	0.0454599	-0.202436	0.0853653	0	1.09458	1.19579	-0.221492	0.483333	0.195101	0.426415
YMR250W	YMR250W iESR cluster GAD1 response to oxidative stress* glutamate decarboxylase activity cytoplasm | YMR251W	1.82927	1.52654	-0.0698596	0.554082	-0.658316	-0.736314	0	1.24939	0.883221	-0.525665	0.108307	-0.775363	-0.731224	0	1.41969	1.62953	-0.597621	0.543319	0.0961943	0.709981
YGR201C	YGR201C iESR cluster YGR201C biological process unknown molecular function unknown cellular component unknown | YGR202C	0.314694	-0.0133156	0.102689	0.3187	1.37143	0.98583	0	0.37407	0.0458738	-1.71329	-1.40574	0.792041	0.727742	0	0.0426238	-0.385649	-1.41601	-1.19012	0.663598	0.74348
YMR276W	YMR276W ... DSK2 ER-associated protein cataboli "protein binding, bridging" nucleus | YMR277W	0.754263	0.918739	-0.80533	-0.888045	0.779124	-0.180464	0	0.586962	0.683185	-0.910852	0.174865	0.87301	-0.545183	0	0.447182	0.805136	-0.0704631	0.0312373	1.02108	1.3047
YAL020C	YAL020C ... ATS1 budding cell bud growth* molecular function unknown cytoplasm | YAL021C	1.35534	1.38978	-0.337993	-0.480965	0.87018	0.810076	0	1.17552	0.757088	-1.34355	-0.307132	0.310456	-0.358415	0	0.795984	1.23157	0.171766	0.0549062	0.627425	0.791843
YLR058C	YLR058C ... SHM2 one-carbon compound metabolism glycine hydroxymethyltransferase accytoplasm | YLR059C	0.600534	0.595341	-1.81402	-1.77084	0.305875	0.00951625	0	0.141517	-0.124161	-0.338398	0.181702	1.38291	0.94464	0	0.397702	0.199361	-0.802567	-1.19959	0.361291	0.454147
YEL011W	YEL011W iESR cluster GLC3 glycogen metabolism "1,4-alpha-glucan branching enzyme a"cytoplasm | YEL012W	0.581746	0.563249	-2.77338	-2.29961	-0.89006	-0.607133	0	0.780727	0.883931	-0.637026	-0.692139	-0.179945	-0.366682	0	0.871306	1.18033	-0.534611	-0.445979	-0.16083	0.574023
YDR077W	YDR077W ... SED1 cell wall organization and bio structural constituent of cell wallmitochondrion* | YDR078C	1.601	0.602362	-0.413185	-0.985306	-0.494467	-0.513917	0	0.59718	-0.712773	-0.815719	-1.15892	-0.520378	-0.917958	0	1.31413	0.45932	-0.26881	-0.758437	-1.00172	-0.708856
YDL022W	YDL022W iESR cluster GPD1 intracellular accumulation of glycerol-3-phosphate dehydrogenase cytosol* | YDL023C	0.66728	0.158451	-1.35688	-1.15391	-1.24233	-1.58029	0	1.05214	0.855285	0.154307	0.677958	-0.254362	-0.762181	0	1.07565	0.837165	-0.120475	-0.0268413	-0.175494	0.187702
YNL276C	YNL276C ... | YNL277W	1.08302	0.646552	-0.418536	0.416466	0.473879	-0.161011	0	1.71176	0.962081	-0.452109	-0.0604917	-0.337242	0.0115351	0	1.31619	0.527871	-0.189536	-0.264712	-0.243292	-0.777352
YLR411W	YLR411W ... CTR3 copper ion import copper uptake transporter activity integral to plasma membrane | YLR412C-A	0.569481	-0.0171294	-0.809128	-0.286891	-0.350666	-0.389653	0	0.526798	0.402618	-1.85082	-1.07003	-0.447629	-0.234801	0	0.789425	0.309149	-1.57395	0.476101	-0.243292	-0.147698
YBR132C	YBR132C ... AGP2 response to osmotic stress* amino acid transporter activity* endoplasmic reticulum membrane* | YBR133C	1.601	0.998794	-0.430865	0.580423	-0.246989	-0.645628	0	0.508371	0.118104	-0.669055	-0.656101	-1.20545	-1.12817	0	0.829002	0.76173	-0.550873	0.149265	-0.430571	-0.0818545
YLR141W	YLR141W ... RRN5 transcription from RNA polymer RNA polymerase I transcription factRNA polymerase I upstream activatin | YLR142W	0.691764	1.1287	-0.89891	-1.07985	0.725587	0.17568	0	0.37407	0.860318	-0.654948	-0.875226	0.126158	0.167654	0	0.583192	1.12024	-0.498086	0.216503	0.519669	1.04107
YNL245C	YNL245C ... CWC25 nuclear mRNA splicing, via spl molecular function unknown spliceosome complex | YNL246W	0.829268	1.29514	-0.443346	-0.0364641	0.397427	0.442567	0	0.354306	0.793614	-0.476918	0.039044	0.148185	0.182154	0	0.142159	0.77785	-0.638844	0.141687	1.34167	0.668014
YFR020W	YFR020W ... | YFR021W	0.739679	0.803534	-1.14436	-0.649711	-0.466511	-0.133909	0	0.888643	0.936514	-1.06831	-0.300806	0.184711	0.0502252	0	1.03776	0.703041	-1.04661	-0.434637	-0.458305	0.0346738
YJL217W	YJL217W … REE1 biological process unknown molecular function unknown | Cytoplasmic protein involved in the regulation of enolase (ENO1); mRNA expression is induced by calcium shortage, copper deficiency (via Mac1p) and the presence of galactose (via Gal4p); mRNA expression is also regulated by the cell cycleYJL218W	0	0	0	-2.73305	-0.270864	-0.626381	0	0	0	0	0	-0.25924	-0.0249908	0	0	0	0	0	0.514137	0.23545
YER067W	YER067W ... YER067W biological process unknown molecular function unknown cytoplasm* | YER068W	-0.460239	-2.1514	-0.628989	-0.695089	-0.0879998	-0.161011	0	1.82153	0.814675	-0.547084	-0.818937	0.370577	-0.210857	0	1.45532	1.52328	0.198845	0.497894	1.34167	1.37151
YMR105C	YMR105C iESR cluster PGM2 glucose 1-phosphate utilizatio phosphoglucomutase activity cytosol | YMR105W-A	0.247333	-0.155365	-1.51231	-0.822002	0.464541	-0.604962	0	0.63045	0.68592	-1.11377	-0.930899	0.0657226	0.0475778	0	0.723075	1.28035	-0.997062	-0.605749	1.45468	0.678749
YHR189W	YHR189W ... PTH1 protein biosynthesis aminoacyl-tRNA hydrolase activity mitochondrion | YHR190W	0.703737	1.15845	-0.89891	-0.635065	0.0274774	-0.62407	0	0.888643	0.788797	-0.304451	-0.545919	1.00063	-1.28803	0	0.557197	1.26328	-0.0126587	-0.0841395	0.9791	-0.0613157
YPL231W	YPL231W ... FAS2 fatty acid biosynthesis* phosphopantetheinyltransferase actimitochondrion* | YPL232W	0.713757	0.804111	-0.690666	-0.723964	-0.0391166	0.287	0	0.431579	0.486356	-0.37941	-0.0414221	-0.0272541	0.0100639	0	0.223686	0.47143	-0.504363	-0.311038	0.306135	0.433577
YFR030W	YFR030W ... MET10 sulfate assimilation sulfite reductase (NADPH) activity cytoplasm* | YFR031C	0.0222867	-0.167147	-1.18593	-0.906092	-0.870608	-0.474135	0	-0.16006	-0.305706	-0.00208607	0.300749	-0.0466013	0.418563	0	-0.216141	-0.160121	-0.795963	-0.29207	0.211139	0.641139
YIL154C	YIL154C ... IMP2' DNA repair* transcription coactivator activity cytoplasm | YIL155C	0.666715	1.3511	-0.318326	-0.924571	-0.142448	0.373619	0	0.601762	1.21764	-0.178567	-0.86142	0.130263	-0.651773	0	0.018777	1.42555	-0.0126587	0.145164	1.64568	1.40672
YIL089W	YIL089W ... YIL089W biological process unknown molecular function unknown cellular component unknown | YIL090W	0.677264	1.16738	0.15427	0.326968	0.731428	0.0896253	0	0.981752	0.864003	-1.9382	-0.353273	0.119616	0.364051	0	0.6947	0.868998	-0.288293	0.41336	1.22383	0.599198
Cluster_14	#N/A	0	0	0	0	0	0	0	0	0	0	0	0	0	0	0	0	0	0	0	0
YBR105C	YBR105C ... VID24 vesicle-mediated transport* molecular function unknown extrinsic to membrane* | YBR106W	2.10985	2.07831	1.52173	1.41208	1.11543	0.838382	0	1.52432	1.34237	0.552451	0.447129	0.521402	0.0726578	0	1.67079	1.49828	-0.528782	0.139185	0.29985	0.49396
YGR087C	YGR087C ... PDC6 ethanol metabolism pyruvate decarboxylase activity cytoplasm | YGR088W	2.63662	3.25799	-4.0168	2.72644	-1.088	0.0540014	0	3.58908	3.45468	0	-0.545919	1.71503	-0.510418	0	2.01663	1.77785	0	0.41336	0.564063	0.569451
YPR201W	YPR201W ... ARR3 arsenite transport arsenite transporter activity integral to plasma membrane | YPR202W	1.51045	1.83418	0.0339762	0.437999	1.65229	2.22907	0	1.92548	2.3938	0.000403	-0.183348	-1.69981	1.12701	0	1.39966	1.38451	0.724307	0.891407	0.493673	1.72145
YOL119C	YOL119C ... MCH4 transport transporter activity* vacuolar membrane (sensu Fungi) | YOL120C	1.48878	1.47687	0.503922	0.541092	0.946934	1.27778	0	0.855476	0.479578	0.833584	0.449781	0.479512	0.662731	0	0.845958	0.823174	-0.0547227	-0.0780905	0.676739	0.678209
YOR237W	YOR237W ... HES1 steroid biosynthesis oxysterol binding cellular component unknown | YOR238W	2.5948	2.38352	0.355904	2.53486	0.104645	0.172646	0	1.50531	1.85774	-0.677668	1.62401	0.778235	2.573	0	0.604503	1.01886	-0.427696	3.67075	1.70424	1.42506
YBR214W	YBR214W ... SDS24 endocytosis* molecular function unknown cytoplasm | YBR215W	1.95952	1.48105	0.416833	0.251	0.0256569	-0.0614758	0	1.45838	1.0532	-0.0281657	0.583849	-0.138696	-0.79582	0	1.10379	1.16904	0.172897	0.289371	0.268914	1.275
YKR103W	YKR103W ... NFT1 transport "ATPase activity, coupled to transme"membrane | YKR104W	2.12986	1.64284	0.184393	0.421204	0.169388	0.526099	0	1.83126	1.47248	-0.0811264	0.202274	0.161275	0.475062	0	1.33591	1.16075	0.137758	0.252564	0.429133	0.46903
YNL200C	YNL200C iESR cluster YNL200C biological process unknown molecular function unknown cytoplasm* | YNL201C	2.00615	1.11597	1.61894	2.21839	-0.123624	-0.452351	0	2.00171	1.55749	2.39272	2.06879	0.571993	-0.491309	0	1.87284	1.45028	1.98734	2.39064	0.647083	1.09552
YKR104W	YKR104W ... YKR104W transport "ATPase activity, coupled to transme"membrane | YKR105C	2.07176	2.25799	0.407435	0.507145	0.796523	0.932372	0	1.86919	2.30149	0.495168	0.227489	0.394164	0.635433	0	1.12488	1.61279	0.572304	0.272498	0.889158	0.579646
YLL028W	YLL028W ... TPO1 polyamine transport spermine transporter activity* plasma membrane* | YLL029W	1.85345	1.77602	0.969719	0.437329	1.21223	1.23113	0	2.14853	1.9116	1.41281	0.329562	1.46406	1.14389	0	1.31698	1.17766	-0.0791833	-0.431788	0.213355	0.349293
YJR116W	YJR116W ... YJR116W biological process unknown molecular function unknown cellular component unknown | YJR117W	2.69527	2.24998	0.924629	0.0924018	0.206061	0.0114557	0	2.34324	1.98953	1.01611	0.223127	0.586555	0.194126	0	0.712908	0.543049	0.49664	0.167299	0.130386	0.180212
YML058W-A	YML058W-A ... HUG1 response to DNA damage stimulu molecular function unknown cytoplasm | YML059C	0.90727	0.936058	0.786049	0.577929	0.104645	0.562148	0	1.17815	1.53957	0.211908	-0.639028	1.24772	2.16096	0	-0.2908	0.514815	0.262976	0.622814	-0.465685	0.515003
YDR171W	YDR171W iESR cluster HSP42 response to stress* unfolded protein binding cytoplasm* | YDR172W	2.64846	3.06317	0.420999	1.04912	0.912	0.0452312	0	1.96299	3.48203	1.08132	1.52199	0.24772	0.235265	0	0.965282	2.48412	1.20576	1.80816	0.887952	1.62659
YLR438W	YLR438W ... CAR2 arginine catabolism ornithine-oxo-acid transaminase actcytoplasm* | YLR439W	1.48194	1.41075	-0.36001	-0.770862	1.54259	0.757164	0	1.19595	0.986217	0.109711	-0.0117463	0.916103	-0.436417	0	1.59824	1.90771	0.227507	-0.437661	0.608562	1.44622
YMR189W	YMR189W ... GCV2 one-carbon compound metabolism glycine dehydrogenase (decarboxylatmitochondrion* | YMR190C	1.52368	1.4142	0.0547348	0.227432	-0.284801	-0.141478	0	0.958694	0.674575	0.564304	1.26144	0.414175	0.561195	0	1.22502	1.21763	0.182598	0.735288	0.619688	1.15074
YDR019C	YDR019C ... GCV1 one-carbon compound metabolism glycine dehydrogenase (decarboxylatmitochondrion* | YDR020C	1.74434	2.20777	-0.00254966	0.148185	0.766802	0.654351	0	1.33051	1.7131	0.511365	0.247152	1.78999	1.38137	0	0.817767	1.40439	0.280123	0.310267	2.0223	1.65434
YNL160W	YNL160W iESR cluster YGP1 response to stress* molecular function unknown cell wall (sensu Fungi) | YNL161W	3.97331	2.53894	1.52731	1.10363	0.657427	1.24109	0	3.89942	3.06134	1.98926	0.830035	1.10147	1.3108	0	2.76509	3.04838	1.01482	0.895053	0.406211	1.24247
YGR244C	YGR244C ... LSC2 tricarboxylic acid cycle* succinate-CoA ligase (ADP-forming) mitochondrion | YGR245C	1.54987	2.24136	0.648452	1.179	0.978625	0.848887	0	0.655212	1.2047	0.229008	0.12187	0.199883	-0.0346005	0	0.6935	1.6296	-0.0334505	0.329402	1.5382	1.13748
YJL052W	YJL052W ... TDH1 glycolysis* glyceraldehyde-3-phosphate dehydrogcytosol* | YJL053W	3.47098	0.890255	1.11225	0.778865	0.478033	0.391131	0	4.19445	2.6391	1.47205	0.436921	0.509859	0.997105	0	3.77959	2.26649	1.1699	1.30457	0.155535	0.49535
YEL060C	YEL060C iESR cluster PRB1 sporulation* serine-type endopeptidase activity vacuole (sensu Fungi)* | YEL061C	2.58453	2.70964	0.72773	1.13898	1.13299	0.516069	0	1.62628	2.01699	0.480188	0.432907	0.761856	-0.0911181	0	1.07767	2.03405	0.0338839	0.194546	1.16743	1.28578
YBL098W	YBL098W ... BNA4 NAD biosynthesis kynurenine 3-monooxygenase activitymitochondrion | YBL099W	1.47993	1.41927	1.15901	1.1185	1.27973	1.00834	0	0.463226	0.380901	0.610866	0.123933	0.844698	0.484144	0	1.0597	0.656543	0.2224	0.49481	0.995157	0.780165
YLR178C	YLR178C iESR cluster TFS1 regulation of proteolysis and lipid binding* soluble fraction | YLR179C	1.34914	1.38274	0.593404	0.108596	0.141482	0.192915	0	1.42323	1.3986	-0.160061	0.29928	0.293956	0.398884	0	0.818462	1.01348	0.114453	0.442423	0.93215	0.992224
YLR327C	YLR327C … iESR cluster TMA10 (RBF9) biological process unknown molecular function unknown nucleus | Protein of unknown function that associates with ribosomesYLR328W	2.52971	1.10598	-0.200489	0.0754288	1.23393	-0.930892	0	2.39114	2.38757	1.17033	1.44114	2.10754	0.514673	0	1.83022	3.53274	0.835338	0.190968	2.59801	2.09411
YDR534C	YDR534C ... FIT1 siderophore transport molecular function unknown cell wall (sensu Fungi) | YDR535C	3.69817	3.95925	2.32028	2.81111	0.638982	0.58007	0	3.09081	4.05734	1.90964	1.3085	1.13569	0.226548	0	0.133986	0.905605	-1.32582	-0.349601	-0.243292	-0.167515
YNL148C	YNL148C ... ALF1 post-chaperonin tubulin foldin microtubule binding* cytoplasm* | YNL149C	1.05166	1.85033	0.285515	-0.172499	1.08193	1.31704	0	0.976106	1.3392	0.856014	-0.565027	0.408712	1.40712	0	0.557197	1.16487	0.639418	0.17666	0.756708	1.75708
YFL055W	YFL055W ... AGP3 amino acid transport amino acid transporter activity plasma membrane | YFL056C	2.6225	1.97894	0.0116084	0.410613	0.401385	0.340306	0	2.05857	1.52097	0.650461	1.08277	0.293235	0.686619	0	0.943255	0.294908	-0.0350265	0.467808	0.246093	0.0863676
YPL240C	YPL240C ... HSP82 response to stress* "ATPase activity, coupled" cytoplasm | YPL241C	1.61078	2.21054	-0.0854799	0.521116	1.22676	0.709069	0	1.55609	2.44565	0.225248	0.779293	1.10071	0.602926	0	0.155694	0.997208	0.218173	0.932352	1.5429	2.23353
YLL026W	YLL026W iESR cluster HSP104 response to stress* chaperone binding* cytoplasm* | YLL027W	1.67114	2.15845	0.287623	0.866774	0.100977	0.296105	0	1.35817	2.36919	0.606197	1.02022	0.313156	0.378551	0	0.162753	0.955196	-0.0575846	0.534639	0.353562	0.732985
YGR032W	YGR032W ... GSC2 cell wall organization and bio "1,3-beta-glucan synthase activity"prospore membrane* | YGR033C	1.61156	0.775912	0.309394	0.139154	-0.24524	0.0351115	0	1.83301	1.35827	0.431519	0.277042	0.427678	0.750008	0	1.35232	1.22368	0.131613	0.218852	0.840476	1.09318
YOL151W	YOL151W iESR cluster GRE2 response to stress oxidoreductase activity* cytoplasm* | YOL152W	1.1893	0.782828	0.360204	0.834705	0.671536	1.00293	0	1.54215	1.63557	1.18089	0.99465	-0.0277389	0.381058	0	0.0982041	-0.10215	0.00871497	-0.0985389	0.939215	1.07747
YKL055C	YKL055C ... OAR1 aerobic respiration* 3-oxoacyl-[acyl-carrier protein] remitochondrion | YKL056C	1.89966	1.91334	1.065	1.38355	1.67753	0.948885	0	1.21057	1.99525	0.521236	0.479617	1.18771	0.884991	0	1.18947	1.30141	0.245139	0.512896	1.09774	0.58239
YOR316C	YOR316C ... COT1 zinc ion homeostasis* "di-, tri-valent inorganic cation tr"mitochondrion* | YOR316C-A	2.77306	2.64142	0.787726	1.6594	1.06161	1.22125	0	2.69386	2.78301	0.64385	0.976869	1.0043	1.03169	0	1.89104	2.14398	-0.384026	0.563358	0.133013	0.346028
YGR131W	YGR131W ... YGR131W biological process unknown molecular function unknown cellular component unknown | YGR132C	2.23735	1.43356	1.44901	0.338463	-1.27563	-0.427125	0	2.27567	2.5077	1.11588	0.176548	-0.343119	0.178381	0	0.94422	0.445274	0.987341	1.48375	-0.55645	-0.326714
YMR246W	YMR246W ... FAA4 lipid metabolism* long-chain-fatty-acid-CoA ligase accytoplasm* | YMR247C	1.60216	1.54718	0.619157	0.71142	0.451446	0.795787	0	1.59201	1.64895	0.332373	0.217089	0.971285	0.809328	0	0.841327	0.693182	0.146979	0.422328	1.01765	0.504072
YJR078W	YJR078W ... BNA2 NAD biosynthesis "tryptophan 2,3-dioxygenase activity"cytoplasm | YJR079W	1.41423	1.25799	-0.287952	0.0754288	0.496963	0.606542	0	4.28096	4.75014	2.32233	1.20897	2.47011	3.04758	0	1.77959	1.94777	1.12484	0.905213	1.00464	2.25751
YOL002C	YOL002C ... IZH2 lipid metabolism* metal ion binding integral to membrane* | YOL003C	1.83124	1.73954	1.24352	1.0828	0.379369	0.867344	0	1.58158	1.41226	0.0396629	-0.420018	0.35527	0.294208	0	0.406361	-0.19535	-0.487511	-0.358768	0.0548399	-0.0968516
YIR039C	YIR039C iESR cluster YPS6 biological process unknown aspartic-type endopeptidase activitcell wall (sensu Fungi) | YIR040C	1.6688	1.74341	-0.653236	-0.125484	-1.25792	0.732073	0	2.44807	2.4935	0.930394	0.524471	0.963153	2.15255	0	1.57606	1.62585	-0.910089	-0.455709	1.71607	1.68493
YPL135W	YPL135W ... ISU1 iron ion homeostasis* protein binding mitochondrion* | YPL136W	0.848973	0.800885	0.513144	0.919195	0.59984	0.672458	0	0.793453	0.854943	0.401965	0.392246	0.315785	0.488861	0	1.52929	1.73205	0.130974	0.833142	0.442599	0.830561
YOR377W	YOR377W ... ATF1 fatty acid metabolism* alcohol O-acetyltransferase activitlipid particle* | YOR378W	2.45586	2.41914	1.44901	1.16211	0.723555	1.32265	0	1.93972	1.94897	-0.522275	-0.0780887	0.347256	0.767538	0	-0.165757	-0.327945	-0.545533	-0.0903816	0.271281	-0.0935145
YGR243W	YGR243W ... FMP43 biological process unknown molecular function unknown mitochondrion | YGR244C	2.63662	0.936058	1.75221	1.68841	1.82954	0.439292	0	3.21057	2.45468	1.63117	1.56629	1.38765	0.147891	0	2.25764	2.00024	0.940036	1.12031	-0.16529	-0.237904
YOL016C	YOL016C ... CMK2 protein amino acid phosphoryla calcium- and calmodulin-dependent pcytoplasm | YOL017W	1.78174	1.61302	0.890782	1.2635	0.0298366	-0.0318593	0	1.40054	1.80006	1.25012	1.6571	0.756826	0.893893	0	0.543776	0.685927	0.537815	0.864467	1.24651	0.727851
YLL039C	YLL039C iESR cluster UBI4 response to stress* protein tag* cytoplasm | YLL040C	1.82592	2.05664	0.496825	0.885424	0.9983	0.381436	0	1.25788	1.89198	0.393318	-0.0271897	0.829752	0.14448	0	0.902972	1.46361	0.260792	0.675816	1.76656	1.8198
YNL208W	YNL208W iESR cluster YNL208W biological process unknown molecular function unknown mitochondrion | YNL209W	1.37464	1.36883	0.690108	0.805201	0.664539	0.418781	0	1.13287	1.37415	0.454547	0.33352	0.590457	-0.00582854	0	0.344812	0.805619	-0.0626468	0.140283	1.51035	1.33178
YOR302W	YOR302W ... YOR302W regulation of protein biosynth translation regulator activity cytosol | YOR303W	1.54134	1.11609	0.45974	-0.005708	-0.183157	0.28051	0	1.52336	1.42618	0.841205	0.228869	0.930474	0.913609	0	1.24591	1.45135	0.00162554	0.10161	-0.512479	0.0719509
YOR303W	YOR303W ... CPA1 arginine biosynthesis carbamoyl-phosphate synthase (glutacarbamoyl-phosphate synthase comple | YOR304C-A	1.04984	1.08114	-0.0209951	0.2302	0.382421	0.488404	0	0.932973	1.13264	0.580991	0.210879	0.67116	0.736987	0	0.875307	1.46528	-0.411323	0.066891	-0.258541	-0.156345
YOL153C	YOL153C	2.26223	1.25799	1.2039	1.87061	-0.127528	0.58007	0	2.47361	1.34574	2.32233	2.23698	-0.516948	0.752617	0	2.14216	1.36281	0.687781	0.495822	0.613344	1.43074
YDR492W	YDR492W ... IZH1 lipid metabolism* metal ion binding endoplasmic reticulum* | YDR493W	1.9498	1.81053	0.733542	0.253248	-0.136021	-0.0475602	0	1.9227	1.77317	-0.308801	-0.904201	0.257705	-0.174013	0	0.379025	0.154722	-0.304376	-0.341527	-0.0925778	-0.292788
YCL038C	YCL038C ... ATG22 protein-vacuolar targeting* molecular function unknown integral to membrane* | YCL039W	2.36404	2.17666	0.745731	0.586682	0.281234	0.198095	0	2.1882	1.93802	0.850923	0.142995	0.737593	0.393009	0	1.28675	0.972497	0.712902	0.526923	0.695307	0.46546
YMR319C	YMR319C ... FET4 intracellular copper ion trans iron ion transporter activity integral to plasma membrane | YMR320W	1.42651	1.06496	0.246553	1.20838	-0.225503	-0.152449	0	1.86063	2.05144	-0.0162204	0.764537	1.66094	2.07454	0	1.45502	0.925126	-0.516143	0.643892	2.04323	2.00686
YOR384W	YOR384W ... FRE5 biological process unknown ferric-chelate reductase activity mitochondrion | YOR385W	2.48327	2.01852	0.183083	0.875973	2.46659	2.92254	0	2.01063	2.09761	0.429837	0.764869	2.41497	2.85731	0	1.67919	1.52328	-0.36171	-0.160744	0.809819	1.39661
YCL040W	YCL040W iESR cluster GLK1 carbohydrate metabolism* glucokinase activity cytosol | YCL041C	2.0923	1.17552	0.467943	0.407863	0.27305	-0.111976	0	2.20684	1.62752	0.827072	0.325061	0.191957	-0.530317	0	1.52186	1.86154	0.367945	0.063911	0.0854572	1.15807
YBR056W-A	YBR056W-A ... YBR056W-A biological process unknown molecular function unknown cellular component unknown | YBR057C	2.55509	1.98668	0.507907	0.827501	2.15993	-0.448499	0	2.41702	1.99525	0.874873	1.46354	2.64004	0.817157	0	1.83404	1.39676	0.340978	0.837858	1.45715	-0.102975
YGL062W	YGL062W ... PYC1 gluconeogenesis* pyruvate carboxylase activity cytosol | YGL063W	1.47898	1.46735	-1.10301	-0.103695	0.462442	0.765191	0	1.80394	1.91751	0.557078	1.12552	0.847544	1.19429	0	1.53491	1.98123	0.265292	1.61995	0.507055	1.0659
YJR155W	YJR155W ... AAD10 aldehyde metabolism aryl-alcohol dehydrogenase activitycellular component unknown | YJR156C	4.76381	4.32755	0.60867	1.24908	1.22359	0.965563	0	3.67816	3.97446	0.200702	0.970331	1.02031	1.00502	0	2.36011	2.11362	-0.0436856	0.947097	0.70424	0.649504
YNL054W-B	YNL054W-B	1.76338	3.379	-0.103527	0.560856	0	0	0	2.49914	3.59516	1.24141	0.524471	0	0	0	1.08969	2.90713	0.615373	1.76386	0	0
YAL067C	YAL067C ... SEO1 transport transporter activity membrane | YAL067W-A	0.951258	0.135367	1.29701	-1.2465	0.104645	0.201559	0	2.94073	2.25159	3.10474	1.41756	2.3632	2.394	0	1.08444	0.666818	2.30927	1.17889	1.70424	1.9279
YBR069C	YBR069C ... TAT1 amino acid transport amino acid transporter activity plasma membrane | YBR070C	1.45047	1.61223	1.34907	1.47705	0.912	0.97448	0	1.02896	1.16869	0.375853	0.0829873	0.397618	0.473698	0	1.28957	1.4635	0.331812	0.641151	0.635155	0.358159
YGR037C	YGR037C ... ACB1 fatty acid metabolism* long-chain fatty acid transporter acytoplasm* | YGR038W	1.426	1.53879	0.642484	0.682202	0.549878	0.562693	0	1.59446	1.75205	0.435403	0.494946	0.749901	0.73825	0	0.0767614	-0.212932	-0.107607	-0.00848024	0.16452	0.0659075
YNL125C	YNL125C ... ESBP6 transport transporter activity* mitochondrion* | YNL126W	1.53217	1.3714	0.992871	0.939151	0.989383	1.16786	0	1.01395	0.744063	0.759887	0.382403	0.648952	0.726911	0	1.89401	1.83377	0.80009	0.920184	1.25886	1.5486
YOR185C	YOR185C iESR cluster GSP2 nuclear organization and bioge GTPase activity nucleus | YOR186W	2.2252	1.6365	1.3433	1.51953	-0.0238695	-0.432557	0	2.04159	2.01963	0.724769	1.05572	0.126158	-0.519878	0	2.15476	1.78602	1.38264	1.691	0.983777	1.17004
YGL039W	YGL039W ... YGL039W biological process unknown oxidoreductase activity* cytoplasm | YGL040C	3.61339	3.72614	1.28049	1.33177	0.74052	0.978234	0	3.56775	3.9157	1.06466	1.07105	1.60082	1.59937	0	-0.0686787	0.0105105	-0.652414	-0.294613	0.220655	-0.163792
YAL044C	YAL044C ... GCV3 one-carbon compound metabolism glycine dehydrogenase (decarboxylatmitochondrion* | YAL044W-A	1.75642	2.05472	0.212574	0.638614	1.14904	0.862405	0	1.44499	1.59885	0.997605	0.808863	0.921891	0.534347	0	0.825686	1.02874	0.406567	0.700009	1.18244	0.8994
YOL082W	YOL082W iESR cluster ATG19 protein-vacuolar targeting protein binding cytoplasm* | YOL083W	1.20778	1.29863	0.223947	0.439703	0.581852	0.103167	0	0.969839	1.3667	0.610088	0.495682	1.06957	0.437352	0	0.687781	1.29242	0.0398087	0.380372	1.92663	1.37038
YPL272C	YPL272C ... YPL272C biological process unknown molecular function unknown cellular component unknown | YPL273W	3.2887	1.07356	-0.30551	0.747375	0.496963	0.147111	0	2.82724	0.760782	0.068575	0.404328	1.05508	2.58644	0	2.97223	2.01051	0.281073	1.43761	0.756708	0.923087
YPL017C	YPL017C … IRC15 biological process unknown S-adenosylmethionine-dependent | Microtubule associated protein; regulates microtubule dynamics; required for accurate meiotic chromosome segregation; null mutant displays large budded cells due to delayed mitotic progression, increased levels of spontaneous Rad52 fociYPL018W	3.16425	4.12588	1.21455	1.01885	0.159928	1.10131	0	2.23657	3.2047	1.13791	1.54806	-0.529887	0.177638	0	2.0285	3.50577	1.20973	1.10524	-0.65833	0.486988
Cluster_15	#N/A	0	0	0	0	0	0	0	0	0	0	0	0	0	0	0	0	0	0	0	0
YHR123W	YHR123W ... EPT1 phosphatidylethanolamine biosy ethanolaminephosphotransferase actiendoplasmic reticulum | YHR124W	0.480062	0.0689836	-0.0797384	-0.151909	-0.186966	-0.550326	0	0.459438	0.491135	0.182427	0.105619	-0.029733	-0.0873873	0	0.225839	-0.309855	-0.0849894	-0.242955	-0.558263	-0.206631
YBR212W	YBR212W ... NGR1 mitochondrion organization and RNA binding* cytoplasm* | YBR213W	0.228364	-0.038063	-0.224907	-0.0986575	-0.39029	-0.517857	0	-0.251581	-0.464728	-0.141472	-0.241381	-0.510922	-0.43701	0	0.0477913	-0.0213681	-0.371966	-0.268706	-0.607422	-0.234055
YGL008C	YGL008C PAC cluster PMA1 regulation of pH* "hydrogen-exporting ATPase activity,"plasma membrane* | YGL009C	-0.123691	-0.360088	-0.628124	-0.746576	-0.683586	-0.340391	0	-0.16161	-0.518083	-0.22486	-1.04284	-0.461162	-0.523	0	0.184689	-0.114853	-0.458643	-0.522728	-0.690539	-0.512555
YCR028C	YCR028C ... FEN2 endocytosis* pantothenate transporter activity plasma membrane | YCR028C-A	0.323937	0.202781	0.00521722	0.0038755	-0.102179	0.102943	0	0.261014	-0.0779756	-0.232574	-0.475529	-0.283012	-0.0643018	0	0.361599	0.15674	-0.453231	-0.496442	-0.431409	-0.29752
YLR390W-A	YLR390W-A ... CCW14 cell wall organization and bio structural constituent of cell wallmitochondrion* | YLR392C	0.407008	0.0632	-0.228992	-0.6946	-0.156123	-0.60079	0	0.230248	-0.443298	0.0779672	-0.39765	-0.304895	-1.02848	0	0.15501	-0.299056	-0.595456	-0.68326	-0.907528	-0.700761
YHL026C	YHL026C ... YHL026C biological process unknown molecular function unknown cellular component unknown | YHL027W	-0.269647	0.278291	-0.749945	-0.663373	-0.7266	-0.225114	0	-0.486397	-0.147947	-0.629347	-0.77521	-0.837842	-0.978566	0	0.0339066	0.503411	-0.304968	-0.293633	-0.307901	0.109294
YJL078C	YJL078C ... PRY3 biological process unknown molecular function unknown cell wall (sensu Fungi) | YJL079C	0.691536	0.0597233	-0.0166499	-1.01963	-1.11235	-1.32381	0	0.950874	0.0263583	-0.303776	-0.299527	-0.116057	-0.423842	0	-0.357665	-0.969535	-0.0228997	-0.565481	-0.811451	-0.707594
YMR221C	YMR221C ... FMP42 biological process unknown molecular function unknown mitochondrion* | YMR222C	0.00913046	-0.123732	0.153984	0.106153	-0.271821	-0.15791	0	0.0755834	-0.0858791	0.282088	-0.188966	-0.291984	-0.187042	0	0.0880208	-0.315977	-0.00730545	-0.171764	-0.497503	-0.558573
YLR286C	YLR286C ... CTS1 cytokinesis, completion of sep endochitinase activity endoplasmic reticulum* | YLR287C	0.331049	-0.0600753	-0.302777	-0.316268	-0.845997	-0.836402	0	0.301115	-0.0278132	-0.536895	0.137108	-1.29542	-0.632222	0	0.07035	-0.179154	-0.601457	-0.716388	-1.18391	-1.0176
YPL145C	YPL145C ... KES1 vesicle-mediated transport* oxysterol binding cytoplasm* | YPL146C	0.149922	0.287841	-0.0349711	-0.00403886	-0.307049	-0.140564	0	0.047312	-0.0603976	-0.114447	-0.25849	-0.356901	-0.178782	0	-0.119966	-0.0431562	-0.559246	-0.424114	-0.44629	-0.3695
YCR024C-B	YCR024C-B ... YCR024C-B biological process unknown molecular function unknown cellular component unknown | YCR025C	-0.063333	-0.462284	-0.369749	-0.207772	-0.465088	-0.00211646	0	0.0237472	-0.343516	0.226023	-0.842256	-0.064813	-0.112684	0	0.221311	-0.210497	-0.420556	-0.447445	-0.633853	-0.651238
YOL154W	YOL154W ... ZPS1 biological process unknown molecular function unknown cell wall (sensu Fungi)* | YOL155C	-0.0487419	-0.179419	-0.773379	-0.754646	-1.07072	-0.770427	0	-0.19882	-0.00475225	-0.932482	-0.639028	-0.846033	-0.341541	0	-0.320813	-0.700198	-0.498086	0.168248	-1.40888	-0.710657
YBR238C	YBR238C PAC cluster YBR238C biological process unknown molecular function unknown cytoplasm* | YBR239C	0.0275406	-0.0207851	-0.182001	-0.254038	-0.244725	-0.318066	0	-0.194381	-0.215575	-0.393844	-0.421295	-0.108336	-0.164093	0	-0.180202	-0.248272	-0.485794	-0.417061	-0.225451	-0.396017
YBR196C	YBR196C ... PGI1 glycolysis* glucose-6-phosphate isomerase activcytosol | YBR196C-A	0.116124	0.00785135	-0.021829	0.0286505	-0.0233279	0.0625382	0	0.266052	0.227097	0.423801	0.166807	0.0345689	0.0381004	0	-0.117723	-0.29602	-0.281055	-0.331753	-0.591854	-0.49311
YNL058C	YNL058C ... YNL058C biological process unknown molecular function unknown vacuole (sensu Fungi) | YNL059C	-0.149359	-0.0261396	-0.237326	-0.0143014	-0.438186	0.203507	0	-0.0899836	-0.309231	-1.12888	-1.24003	-0.133627	-0.48721	0	-0.133853	-0.031102	-0.708982	-0.767937	-0.700394	-0.497045
YNL176C	YNL176C ... YNL176C biological process unknown molecular function unknown vacuole (sensu Fungi) | YNL177C	0.155985	-0.0474158	-0.0637498	0.0518303	-0.306861	-0.463448	0	0.0444104	-0.611485	-0.0181523	-0.252355	-0.387616	-0.666694	0	0.242533	0.0275258	-0.274772	-0.044875	-0.277023	-0.349375
YLR459W	YLR459W ... GAB1 attachment of GPI anchor to pr GPI-anchor transamidase activity GPI-anchor transamidase complex | YLR460C	0.325462	0.0148355	0.311086	0.286933	-0.150872	-0.090904	0	0.310837	0.17928	0.354778	-0.0264892	-0.0754044	-0.0363358	0	0.13081	-0.185808	0.037382	0.0148377	-0.290188	-0.306694
YMR149W	YMR149W ... SWP1 N-linked glycosylation dolichyl-diphosphooligosaccharide-poligosaccharyl transferase complex | YMR150C	0.297399	-0.0289514	0.0541718	0.0945095	-0.15254	-0.0636537	0	0.116143	-0.24576	-0.134053	-0.306553	-0.176698	-0.192909	0	0.255541	-0.28859	-0.142935	-0.160574	-0.416925	-0.206215
YJR143C	YJR143C PAC cluster PMT4 O-linked glycosylation dolichyl-phosphate-mannose-protein endoplasmic reticulum | YJR144W	0.0109136	-0.183376	0.0905597	0.136689	-0.158793	-0.0830554	0	-0.116235	-0.38834	-0.117333	-0.235299	-0.396667	-0.255739	0	0.251913	-0.0263247	-0.177807	-0.185205	-0.341035	-0.237339
YKL056C	YKL056C … RP cluster TMA19 biological process unknown molecular function unknown cytoplasm | Protein that associates with ribosomes; homolog of translationally controlled tumor protein; green fluorescent protein (GFP)-fusion protein localizes to the cytoplasm and relocates to the mitochondrial outer surface upon oxidative stressYKL057C	0.0931733	0.054277	0.00327346	-0.0617368	-0.0124554	0.0689762	0	0.143342	0.0111026	-0.024078	-0.0952131	-0.0842122	0.0423432	0	0.152426	-0.387102	-0.111768	-0.251334	-0.396413	-0.386479
YEL034C-A	YEL034C-A … Dubious Dubious open reading frame unlikely to encode a protein, based on experimental and comparative sequence data; completely overlaps HYP2/YEL034W, a verified gene that encodes eiF-5AYEL050W-A	-0.077623	-0.0639417	-0.0274243	-1.02891	-0.480317	-0.554808	0	0.888643	0.21764	0.115881	-0.632333	-0.983605	-1.07192	0	0.898234	-0.58472	0.209734	-0.14254	-0.880722	-1.55393
YNL307C	YNL307C ... MCK1 protein amino acid phosphoryla glycogen synthase kinase 3 activitysoluble fraction | YNL308C	0.140394	-0.153143	-0.035658	-0.240945	-0.331164	-0.333468	0	0.126225	-0.322824	0.0222113	-0.344192	-0.399101	-0.322034	0	0.166582	-0.313983	-0.21742	-0.428423	-0.615958	-0.407047
YLR332W	YLR332W ... MID2 cell wall organization and bio transmembrane receptor activity integral to plasma membrane | YLR333C	0.383336	0.0365852	0.171662	0.308758	-0.0681914	-0.139264	0	0.336917	-0.344138	0.000403	-0.0849	-0.42519	-0.318738	0	0.0754333	-0.332884	-0.571769	-0.484661	-0.851714	-0.794567
YOR085W	YOR085W ... OST3 protein complex assembly* dolichyl-diphosphooligosaccharide-pintegral to membrane* | YOR086C	0.440912	0.314432	0.239852	0.218742	-0.0496992	0.0112417	0	0.431974	0.216612	0.268061	-0.270694	-0.182313	-0.113521	0	0.43847	0.251925	0.0528871	-0.0942344	-0.446648	-0.232421
YLR413W	YLR413W PAC cluster YLR413W biological process unknown molecular function unknown cellular component unknown | YLR414C	0.591096	0.188832	-0.0236144	-0.178898	-0.54321	-0.16982	0	0.542068	0.169797	-0.153036	-0.839851	0.0572139	-0.052355	0	0.0761426	-0.406948	-0.381949	-0.39735	-0.465293	-0.883021
YGL125W	YGL125W ... MET13 methionine metabolism* structural constituent of ribosome*cytoplasm* | YGL126W	-0.405438	-0.84745	-0.949904	-1.18396	-1.088	-0.675761	0	-0.341262	-0.569251	0.443533	0.155925	-0.652323	-0.629268	0	-0.579898	-1.02951	-1.20299	-1.48103	-1.27778	-0.951947
YBR086C	YBR086C ... IST2 response to osmotic stress molecular function unknown plasma membrane* | YBR087W	0.0978588	-0.296375	0.180918	0.0258418	-0.102412	0.0039451	0	0.00183756	-0.318065	-0.088251	-0.532654	-0.360778	-0.411417	0	0.282507	-0.12133	-0.0544789	-0.0883952	-0.436033	-0.202763
YGL077C	YGL077C ... HNM1 choline transport choline transporter activity plasma membrane | YGL078C	0.375379	0.110979	-0.0928397	-0.314731	-0.436986	-0.583407	0	0.060889	-0.364212	0.161171	-0.202189	-0.688857	-0.873945	0	0.143321	-0.0732014	-0.0632474	-0.22311	-0.444308	-0.368405
YOR002W	YOR002W ... ALG6 protein amino acid glycosylati "transferase activity, transferring"endoplasmic reticulum | YOR003W	0.122252	-0.119285	-0.246643	-0.151654	-0.630613	-0.443102	0	0.361041	0.141422	0.0784814	-0.240453	-0.342099	-0.108196	0	0.285626	0.097708	0.10425	-0.0781876	-0.351734	-0.250567
YJR139C	YJR139C ... HOM6 methionine metabolism* homoserine dehydrogenase activity cytoplasm* | YJR140C	-0.103288	-0.223347	-0.372425	-0.166987	-0.33598	-0.182349	0	0.0190108	-0.148738	-0.0260935	-0.30304	-0.255748	-0.0767214	0	0.0744106	-0.372022	-0.319264	-0.320078	-0.53417	-0.411566
YPR074C	YPR074C PAC cluster TKL1 pentose-phosphate shunt transketolase activity cytoplasm | YPR074W-A	0.09173	-0.0446894	-0.251583	-0.293035	-0.188828	-0.0825977	0	0.235981	0.0974459	-0.140234	-0.0439863	-0.0601262	-0.0717121	0	0.018379	-0.208287	-0.354873	-0.465537	-0.503465	-0.207703
YMR274C	YMR274C ... RCE1 protein processing* prenyl-dependent CAAX protease actiintegral to endoplasmic reticulum m | YMR275C	0.0680544	-0.169058	-0.177528	-0.135626	-0.417921	-0.267927	0	0.191205	-0.316965	0.0282377	-0.317441	-0.338571	-0.0590077	0	0.167582	-0.161075	-0.459266	-0.25281	-0.84832	-0.400176
YKL057C	YKL057C ... NUP120 mRNA-nucleus export* structural molecule activity nuclear pore | YKL058W	-0.0804555	-0.012686	-0.297086	-0.0986179	-0.497801	-0.208942	0	-0.116591	-0.333436	-0.304713	-0.371744	-0.501604	-0.225462	0	0.0296298	-0.0829875	-0.313191	-0.159891	-0.297639	-0.200711
YOR067C	YOR067C ... ALG8 N-linked glycosylation* oligosaccharyl transferase activityendoplasmic reticulum membrane | YOR068C	0.2294	0.0504882	-0.0594011	-0.0703558	-0.295261	-0.327602	0	0.222006	0.0778989	-0.0738086	-0.340091	-0.305991	-0.433112	0	0.287642	-0.104581	0.0269783	-0.133738	-0.387128	-0.322899
YHR204W	YHR204W ... MNL1 ER-associated protein cataboli carbohydrate binding endoplasmic reticulum | YHR205W	0.0972367	-0.000915	0.043183	0.101479	-0.0940658	0.0981558	0	-0.04511	-0.381898	-0.43385	-0.0486122	-0.365428	0.0980889	0	-0.0696792	-0.281939	-0.48998	-0.605316	-0.470063	-0.351021
YCR024C-A	YCR024C-A ... PMP1 cation transport enzyme regulator activity plasma membrane* | YCR024C-B	-0.059337	-0.00411535	-0.356394	-0.223004	-0.398697	0.124303	0	0.14291	-0.0493026	0.223674	-0.884027	-0.0586456	-0.0966121	0	0.211655	0.176973	-0.471377	-0.658102	-0.614681	-0.593104
YMR205C	YMR205C ... PFK2 glycolysis 6-phosphofructokinase activity cytoplasm* | YMR206W	0.0535928	-0.116889	-0.145693	-0.229963	-0.216917	0.0757846	0	0.0185028	-0.199712	0.0530833	-0.21958	-0.355286	-0.246765	0	-0.150798	-0.307369	-0.378509	-0.458025	-0.757462	-0.501185
YMR292W	YMR292W ... GOT1 ER to Golgi transport* molecular function unknown Golgi membrane | YMR293C	0.143006	0.0395412	0.102611	0.00996445	-0.196376	-0.176458	0	0.0433653	-0.347296	-0.154951	-0.329634	-0.48626	-0.346919	0	0.240787	-0.38644	-0.228927	-0.245112	-0.639471	-0.434636
YDL212W	YDL212W ... SHR3 ER to Golgi transport* unfolded protein binding integral to endoplasmic reticulum m | YDL213C	0.102442	0.265104	-0.206292	-0.0665681	-0.162279	0.0301547	0	0.0743933	0.0491669	-0.34863	-0.435528	-0.262543	-0.10522	0	0.0658031	-0.296076	-0.250047	-0.315457	-0.319432	-0.370111
YBR029C	YBR029C ... CDS1 phosphatidylglycerol biosynthe phosphatidate cytidylyltransferase mitochondrion* | YBR030W	-0.202751	-0.148562	-0.16128	-0.178297	0.0211784	-0.108248	0	0.0626433	-0.0800178	0.202748	-0.110992	-0.153159	-0.212298	0	0.0201938	-0.141023	-0.141251	-0.130432	-0.238422	-0.206699
YNL190W	YNL190W ... YNL190W response to dessication molecular function unknown cell wall (sensu Fungi) | YNL191W	0.254446	0.015926	-0.0448792	-0.16423	-0.27039	-0.162155	0	0.222547	0.209244	0.0415901	-0.269762	-0.00221828	-0.167065	0	0.317648	0.0227289	-0.0834318	-0.178146	-0.53761	-0.314246
YGR282C	YGR282C ... BGL2 cell wall organization and bio "glucan 1,3-beta-glucosidase activit"cell wall (sensu Fungi) | YGR283C	0.316314	-0.0415792	0.0551486	0.0337755	-0.102412	-0.190108	0	0.211075	-0.0826383	0.178089	-0.177792	-0.290738	-0.425414	0	0.207726	-0.371671	-0.322935	-0.353182	-0.820817	-0.719192
YOR204W	YOR204W ... DED1 translational initiation RNA helicase activity cytoplasm | YOR205C	-0.210953	-0.390321	-0.520913	-0.764851	-0.493046	-0.606356	0	-0.348451	-0.700419	-0.639043	-0.881669	-0.79895	-1.01068	0	0.212284	-0.0316774	-0.358369	-0.555245	-0.471452	-0.0866
YML072C	YML072C ... TCB3 biological process unknown lipid binding mitochondrion* | YML073C	0.0776212	-0.101798	-0.0392398	0.0268032	-0.167439	-0.0373751	0	0.0425497	-0.279438	0.222925	-0.337124	-0.104021	-0.172743	0	0.314499	0.114124	-0.109599	-0.0582895	-0.237748	-0.227472
YLR285C-A	YLR285C-A ... YLR285C-A biological process unknown molecular function unknown cellular component unknown | YLR285W	0.0775266	0.0346222	-0.286622	-0.36724	-0.658535	-1.12844	0	0.110135	0.0593781	-0.741896	0.220651	-1.75147	-0.745677	0	-0.019912	0.318418	-0.728486	-0.604342	-1.03443	-1.24833
YNL044W	YNL044W ... YIP3 ER to Golgi transport molecular function unknown COPII-coated vesicle | YNL045W	0.0493934	-0.251569	-0.24502	-0.215557	-0.305794	-0.44597	0	0.137404	-0.438783	0.177401	-0.229324	-0.394854	-0.436417	0	0.404753	-0.299133	-0.221626	-0.262052	-0.675888	-0.421644
YBL020W	YBL020W ... RFT1 N-linked glycosylation* oligosaccharide transporter activitendoplasmic reticulum membrane | YBL021C	-0.405675	-0.537972	-0.772462	-0.69889	-0.83196	-0.648253	0	0.197544	-0.11043	-0.0884349	-0.312375	-0.436375	-0.193864	0	0.193903	-0.0939403	-0.212918	-0.184915	-0.441468	-0.232814
YAL053W	YAL053W … FLC2 biological process unknown molecular function unknown | Putative FAD transporter; required for uptake of FAD into endoplasmic reticulum; involved in cell wall maintenanceYAL054C	-0.00967001	-0.399252	-0.408028	-0.251294	-0.70127	-0.657048	0	-0.534749	-0.944548	-0.751669	-0.586245	-1.44365	-1.14153	0	-0.0889685	-0.295719	-0.835331	-0.851443	-0.764287	-0.587731
YER009W	YER009W PAC cluster NTF2 protein-nucleus import* Ran GTPase binding nuclear membrane | YER010C	-0.0275641	-0.0817645	0.0818097	-0.0107	-0.0645193	-0.0384162	0	0.10561	0.132115	-0.0838244	-0.0797246	0.00138329	0.0510008	0	0.0369585	-0.569353	0.0975643	-0.0246617	-0.408257	-0.300772
YPL028W	YPL028W ... ERG10 ergosterol biosynthesis acetyl-CoA C-acetyltransferase acticytosol | YPL029W	0.268564	0.0576621	-0.419182	-0.334769	-0.904105	-0.891742	0	0.184682	-0.0164056	-0.184783	-0.184129	-0.757498	-0.810059	0	-0.422247	-0.718622	-0.0480526	-0.267221	-0.745337	-0.531165
YBR085W	YBR085W ... AAC3 anaerobic respiration ATP:ADP antiporter activity mitochondrial inner membrane | YBR086C	-0.33846	0.331078	-0.38673	-0.721038	-1.014	-1.31232	0	-0.457682	-0.0276527	-0.601633	-0.164048	-0.11485	-0.232884	0	-0.542967	-0.566979	-0.262178	0.156869	-0.361937	-0.774504
YML056C	YML056C PAC cluster IMD4 biological process unknown IMP dehydrogenase activity cytoplasm | YML057W	-0.233131	-0.197246	0.21411	-0.0529186	-0.113138	-0.0201062	0	-0.247724	-0.232248	-0.257386	-0.212376	-0.288357	-0.14083	0	0.108713	-0.272067	0.124937	0.0202204	-0.303486	-0.326222
YEL040W	YEL040W PAC cluster UTR2 cell wall organization and bio molecular function unknown cell wall (sensu Fungi)* | YEL041W	-0.649874	-0.709838	-0.415193	-0.454233	-0.699648	-0.596879	0	-0.645518	-0.626304	-0.483833	-0.366585	-0.744916	-0.604904	0	-0.645821	-0.809179	-0.465682	-0.761138	-0.658932	-0.742188
YML058W	YML058W ... SML1 mitochondrion organization and enzyme inhibitor activity cytoplasm* | YML058W-A	0.400402	0.373284	0.158559	-0.12388	0.06082	-0.069816	0	0.0215275	-0.00604906	-0.0432013	-0.776176	0.0439406	-0.510665	0	-0.0230547	-0.142716	-0.491405	-0.636379	-0.803693	-0.426842
YBR096W	YBR096W ... YBR096W biological process unknown molecular function unknown endoplasmic reticulum | YBR097W	0.423141	0.368926	-0.320867	0.252307	-0.338444	-0.106338	0	0.459232	0.265277	0.110028	-0.0545301	-0.126391	-0.0654147	0	0.113268	-0.202488	-0.336622	-0.156005	-0.486915	-0.228141
YCR034W	YCR034W PAC cluster FEN1 vesicle-mediated transport* fatty acid elongase activity endoplasmic reticulum* | YCR035C	0.0469896	-0.00836608	0.18928	0.0812027	-0.177984	-0.153976	0	-0.110052	-0.258556	-0.0853523	-0.316406	-0.470574	-0.345393	0	0.0205401	-0.40508	-0.22597	-0.442363	-0.633334	-0.579945
YLR110C	YLR110C ... CCW12 cell wall organization and bio molecular function unknown cell wall (sensu Fungi) | YLR111W	0.217852	-0.0745068	0.0260395	-0.648518	-0.145207	-0.543439	0	-0.016273	-0.362397	-0.0295717	-0.575308	-0.39026	-1.21749	0	0.25567	-0.176628	-0.0135955	-0.2307	-0.724483	-0.415293
YEL017C-A	YEL017C-A ... PMP2 cation transport molecular function unknown membrane | YEL017W	0.525675	0.521326	0.0114336	0.0495455	-0.165099	0.00841199	0	0.213143	0.412345	0.0659918	-0.405712	-0.1516	-0.164231	0	0.272023	0.0560706	0.0505529	-0.200492	-0.303333	-0.343325
YJL026W	YJL026W ... RNR2 DNA replication ribonucleoside-diphosphate reductascytoplasm* | YJL027C	0.154862	0.119042	-0.479426	-0.448408	-0.53853	-0.525831	0	-0.0236575	-0.25213	-0.16303	-0.217305	-0.304362	-0.410492	0	0.398864	-0.0186609	0.111745	0.134195	-0.189585	-0.378082
YLL031C	YLL031C ... GPI13 GPI anchor biosynthesis "transferase activity, transferring"endoplasmic reticulum | YLL032C	0.266595	0.10339	-0.0312296	0.027275	-0.268364	-0.269241	0	0.0669565	-0.0968482	-0.0234433	-0.343332	-0.307049	-0.343513	0	0.181006	0.0836696	-0.333816	-0.275098	-0.396799	-0.244269
YMR243C	YMR243C PAC cluster ZRC1 zinc ion homeostasis* "di-, tri-valent inorganic cation tr"vacuole (sensu Fungi) | YMR244C-A	-0.0882474	-0.0678716	0.0270311	-0.070845	-0.154682	7.4e-05	0	-0.270199	-0.31194	-0.322233	-0.596595	-0.499608	-0.340301	0	-0.0136183	-0.3012	-0.130736	-0.302659	-0.470509	-0.499427
YIL145C	YIL145C ... PAN6 pantothenate biosynthesis pantoate-beta-alanine ligase activicytoplasm* | YIL146C	-0.0493876	-0.149125	-0.688795	-0.5132	-0.829364	-0.648005	0	-0.00991203	0.000105	-0.712315	-0.590542	-0.220752	-0.263131	0	0.0244246	-0.428414	-0.431777	-0.417529	-0.230177	-0.400127
YCL025C	YCL025C ... AGP1 amino acid transport amino acid transporter activity* plasma membrane | YCL026C-A	-1.11584	-1.02547	-0.320783	-0.663064	-0.341756	-0.294026	0	-0.0184977	-0.432846	0.333827	-0.233364	-0.0755009	0.223095	0	-0.322109	-0.452243	0.277766	-0.474337	-0.756916	-0.202421
YDR233C	YDR233C PAC cluster RTN1 biological process unknown molecular function unknown mitochondrion* | YDR234W	0.0987937	0.00625006	0.0642009	0.122363	-0.203322	-0.113355	0	0.274539	0.0855014	0.0995925	-0.089075	-0.170532	-0.0534573	0	0.282428	-0.101045	0.0661645	-0.124102	-0.454503	-0.271117
YER053C-A	YER053C-A ... YER053C-A biological process unknown molecular function unknown endoplasmic reticulum | YER054C	0.149357	0.16765	-1.24014	-1.3662	-0.816798	-0.452299	0	0.0746102	0.0148523	-0.588506	-0.724516	-0.826301	-1.0017	0	0.272685	-0.0059232	0.259544	0.380251	-1.24681	-1.03269
YOL105C	YOL105C ... WSC3 cell wall organization and bio transmembrane receptor activity membrane fraction | YOL106W	0.583827	-0.0878874	0.180696	0.109449	0.00612233	-0.179117	0	0.404101	-0.616682	-0.300026	-0.649708	-0.590583	-0.715108	0	0.534898	-0.35906	-0.336471	-0.213676	-0.509572	-0.735404
YOR235W	YOR235W … IRC13 | Dubious open reading frame unlikely to encode a protein, based on available experimental and comparative sequence data; null mutant displays increased levels of spontaneous Rad52 fociYOR236W	-0.686982	-0.848774	0.702938	-0.360268	-0.430106	-0.598234	0	-0.159054	-0.198839	-0.778688	-0.387434	-0.47742	-0.745866	0	-0.205408	-1.02447	0.3841	0.159867	-0.690751	-0.813152
YAL060W	YAL060W ... BDH1 butanediol fermentation "(R,R)-butanediol dehydrogenase acti"cytoplasm | YAL061W	0.220389	0.136312	-0.546673	-0.116402	-0.194915	-0.436512	0	-0.119753	-0.217413	-0.0764796	0.355258	-0.977914	-1.27202	0	-0.655924	-0.728725	-1.29482	-0.784999	-1.03435	-1.22485
YDR072C	YDR072C ... IPT1 sphingolipid biosynthesis* "transferase activity, transferring"membrane fraction | YDR073W	0.257485	0.307838	0.109027	0.0099757	-0.0906789	-0.0786319	0	0.335736	0.405079	0.314842	-0.137075	0.159737	0.0991229	0	-0.0544914	-0.0116859	-0.104213	-0.414132	-0.51169	-0.294699
YGR227W	YGR227W ... DIE2 N-linked glycosylation* dolichyl-phosphate-glucose-glycolipendoplasmic reticulum membrane | YGR228W	0.133083	0.292561	0.434514	0.137048	-0.00260835	0.101431	0	0.411374	0.220506	-0.148042	-0.0116758	-0.0715222	0.0449038	0	0.171851	-0.0316579	0.0439248	-0.186102	-0.464708	-0.126849
YDR154C	YDR154C ... | YDR155C	0.620353	-0.0686334	-0.238628	-0.285921	-0.170142	-0.47019	0	-0.0299897	0.464863	-0.453574	0.0114318	-0.0251468	-0.326888	0	-0.0155081	-0.618572	0.175259	-0.104391	-0.485786	-0.156375
YNL066W	YNL066W PAC cluster SUN4 mitochondrion organization and glucosidase activity cell wall (sensu Fungi)* | YNL067W	-0.0845488	-0.368825	-0.251135	-0.644648	-0.823842	-0.950105	0	-0.054726	-0.687965	-0.294205	-0.450668	-0.976733	-0.966047	0	-0.155443	-0.56846	-0.520478	-0.850681	-0.803607	-0.921963
YOL061W	YOL061W ... PRS5 histidine biosynthesis* ribose-phosphate diphosphokinase accytoplasm | YOL062C	-0.0381052	0.0148147	0.0212722	-0.235573	-0.0993672	-0.0105022	0	0.02127	-0.123397	-0.209396	-0.260957	-0.0656884	-0.12492	0	-0.0659041	-0.359582	-0.171265	-0.376379	-0.352023	-0.304535
YLR229C	YLR229C ... CDC42 establishment of cell polarity GTPase activity* plasma membrane* | YLR230W	-0.151438	-0.162122	-0.0601015	-0.252713	-0.254307	-0.225647	0	-0.121991	-0.201018	-0.388042	-0.377372	-0.338768	-0.251561	0	0.175326	-0.189307	0.0199681	-0.0923086	-0.352556	-0.201888
YMR203W	YMR203W ... TOM40 mitochondrial matrix protein i protein transporter activity mitochondrion* | YMR204C	-0.0243802	-0.34163	0.0171397	-0.258015	-0.137719	-0.180424	0	0.0765803	-0.504083	0.0121181	-0.150733	-0.282859	-0.213619	0	0.221789	-0.415658	0.0979034	-0.0914863	-0.483604	-0.335752
YPR028W	YPR028W ... YOP1 vesicle-mediated transport protein binding integral to membrane | YPR029C	0.00444191	-0.136562	0.103075	0.186408	-0.225747	-0.194467	0	-0.227675	-0.175719	-0.0399699	-0.063387	-0.228706	-0.281904	0	0.154378	-0.316399	0.0250003	-0.103603	-0.523951	-0.334595
YLR372W	YLR372W PAC cluster SUR4 sphingolipid biosynthesis* fatty acid elongase activity endoplasmic reticulum* | YLR373C	0.431258	0.339855	0.227764	0.265222	-0.059361	0.029611	0	0.261526	0.202459	-0.138419	-0.228325	-0.353231	-0.141878	0	0.285361	-0.13132	-0.0466829	-0.0965991	-0.340908	-0.294564
Cluster_16	#N/A	0	0	0	0	0	0	0	0	0	0	0	0	0	0	0	0	0	0	0	0
YMR307W	YMR307W PAC cluster GAS1 cell wall organization and bio "1,3-beta-glucanosyltransferase acti"mitochondrion* | YMR308C	-0.395013	-0.581595	-0.0596376	-0.164331	-0.415689	-0.490986	0	-0.309607	-0.511744	-0.222554	-0.145038	-0.594695	-0.397569	0	0.206671	-0.284996	-0.126311	-0.145163	-0.399032	-0.32467
YPL053C	YPL053C ... KTR6 cell wall organization and bio mannosylphosphate transferase activmembrane fraction | YPL054W	-0.6774	-0.486633	-0.255263	-0.303234	-0.506789	-0.557029	0	-0.579136	-0.476504	-0.483581	-0.56727	-0.584623	-0.837814	0	-0.34623	-0.463753	-0.14608	-0.166691	-0.0214352	-0.394024
YDR276C	YDR276C ... PMP3 cation transport molecular function unknown plasma membrane | YDR277C	-0.258546	-0.310197	-0.063018	-0.0168437	-0.482235	-0.455091	0	-0.272648	-0.367206	-0.117174	-0.686639	-0.663104	-0.63898	0	-0.0826275	-0.54347	-0.311751	-0.502701	-0.925356	-0.701292
YJR105W	YJR105W ... ADO1 purine base metabolism adenosine kinase activity cytoplasm* | YJR106W	-0.00660666	-0.297216	-0.299384	-0.363369	-0.610357	-0.6088	0	0.12807	-0.240849	0.0346572	-0.207315	-0.570483	-0.563045	0	-0.204385	-0.626211	-0.283506	-0.497772	-0.911292	-0.688678
YOL092W	YOL092W ... YOL092W biological process unknown molecular function unknown cytoplasm* | YOL093W	-0.35962	-0.51942	-0.343881	-0.48695	-0.456228	-0.350849	0	-0.305257	-0.539574	-0.33758	-0.710819	-0.470379	-0.393256	0	0.0432507	-0.412451	-0.277988	-0.419831	-0.485399	-0.630515
YLR083C	YLR083C PAC cluster EMP70 transport transporter activity membrane fraction* | YLR084C	-0.26093	-0.315083	-0.114324	-0.279828	-0.315017	-0.226942	0	-0.124834	-0.401467	-0.173919	-0.55023	-0.531404	-0.373401	0	0.0771256	-0.354964	-0.251832	-0.362451	-0.530091	-0.54383
YER110C	YER110C PAC cluster KAP123 protein-nucleus import protein carrier activity cytoplasm* | YER111C	-0.422923	-0.533663	-0.176556	-0.334217	-0.322697	-0.00457996	0	-0.411725	-0.573073	-0.26578	-0.342605	-0.354849	-0.038024	0	0.0669272	-0.24989	-0.344144	-0.371167	-0.383877	-0.242214
YHL033C	YHL033C RP cluster RPL8A protein biosynthesis structural constituent of ribosome cytosolic large ribosomal subunit ( | YHL034C	-0.76693	-0.669554	-0.283835	-0.147272	-0.439866	-0.584043	0	-0.665452	-0.436387	-0.368759	-0.283485	-0.314379	-0.421903	0	-0.330826	-0.679645	-0.527813	-0.457093	-0.0767029	-0.345757
YML022W	YML022W RP cluster APT1 AMP biosynthesis* adenine phosphoribosyltransferase acytoplasm* | YML023C	-0.267528	-0.403175	-0.0454093	-0.0550395	-0.345129	-0.167415	0	-0.284316	-0.414161	-0.220435	-0.529704	-0.556296	-0.324313	0	-0.17495	-0.786394	-0.360346	-0.538729	-0.838946	-0.744119
YNL197C	YNL197C ... WHI3 regulation of cell size RNA binding cytoplasm | YNL198C	-0.071364	-0.355502	-0.150829	-0.324118	-0.307455	-0.445385	0	-0.165033	-0.794829	-0.242672	-0.548304	-0.621881	-0.467798	0	0.298922	-0.120443	-0.0502278	-0.0972681	-0.344477	-0.222403
YDL130W	YDL130W ... RPP1B translational elongation* structural constituent of ribosome cytosolic large ribosomal subunit ( | YDL130W-A	-0.25064	-0.749444	-0.00828424	-0.31759	-0.330663	-0.380305	0	-0.415843	-0.404452	-0.483267	-0.420476	-0.555481	-0.740493	0	-0.0732888	-0.684732	0.0352347	-0.22508	-0.555764	-0.224088
YER043C	YER043C PAC cluster SAH1 methionine metabolism* adenosylhomocysteinase activity cytoplasm | YER044C	-0.288884	-0.496945	-0.260304	-0.192775	-0.328217	-0.283666	0	-0.384069	-0.456016	-0.0688215	-0.0174457	-0.350235	-0.336786	0	-0.338903	-0.644719	-0.232873	-0.403681	-0.538581	-0.387764
YDR012W	YDR012W RP cluster RPL4B protein biosynthesis structural constituent of ribosome cytoplasm* | YDR013W	-0.193698	-0.455809	-0.0740835	-0.265804	-0.386003	-0.30492	0	-0.139476	-0.513741	-0.218226	-0.482596	-0.502596	-0.480262	0	-0.117588	-0.576999	-0.286681	-0.405522	-0.739796	-0.520465
YGL028C	YGL028C ... SCW11 cytokinesis, completion of sep "glucan 1,3-beta-glucosidase activit"cell wall (sensu Fungi) | YGL029W	-0.216622	-0.71016	-0.404734	-0.415191	-0.627774	-0.515959	0	-0.189138	-0.770509	-0.510819	0.0768035	-0.610807	-0.136166	0	0.0916915	-0.340129	-0.324513	-0.655518	-0.778835	-0.62583
YBR187W	YBR187W … GDT1 biological process unknown molecular function unknown | Putative protein of unknown function; expression is reduced in a gcr1 null mutant; GFP-fusion protein localizes to the vacuole; expression pattern and physical interactions suggest a possible role in ribosome biogenesisYBR188C	-0.199509	-0.169451	0.124208	-0.292185	-0.353935	-0.27046	0	-0.224462	-0.246904	-0.355292	-0.431628	-0.497369	-0.307684	0	-0.0525839	-0.462951	-0.067538	-0.482559	-0.654884	-0.456085
YMR116C	YMR116C RP cluster ASC1 biological process unknown molecular function unknown cytoplasm | YMR117C	-0.488582	-0.715795	-0.268692	-0.413806	-0.528331	-0.525573	0	-0.252897	-0.364901	-0.252799	-0.334182	-0.531562	-0.457626	0	-0.0480024	-0.722866	-0.181424	-0.349201	-0.799792	-0.632489
YKR066C	YKR066C iESR cluster CCP1 response to oxidative stress cytochrome-c peroxidase activity mitochondrion* | YKR067W	-0.282744	-0.0967603	-0.00364508	-0.275662	-0.574047	-0.216271	0	-0.490114	-0.590963	-0.833183	-0.250814	-0.816065	-0.818862	0	-0.0543398	-0.149148	-0.146824	-0.264712	-0.634737	-0.345831
YEL046C	YEL046C ... GLY1 threonine catabolism* threonine aldolase activity cytosol | YEL047C	-0.0379195	-0.141165	-0.381203	-0.596128	-0.465444	-0.381649	0	-0.122887	-0.253467	-0.217751	-0.524909	-0.553694	-0.528085	0	-0.143427	-0.306222	-0.574881	-0.772563	-0.583309	-0.29396
YEL034W	YEL034W ... HYP2 translational initiation protein binding* cytoplasm* | YEL035C	-0.382939	-0.363467	-0.356261	-0.473956	-0.461335	-0.527197	0	-0.26353	-0.194614	-0.500484	-0.354418	-0.432203	-0.424985	0	-0.19067	-0.625226	-0.231936	-0.407255	-0.645176	-0.598356
YDL229W	YDL229W ... SSB1 protein biosynthesis ATPase activity* soluble fraction* | YDL230W	-0.417366	-0.491414	-0.289861	-0.363347	-0.350996	-0.263194	0	-0.429516	-0.659261	-0.343062	-0.293428	-0.447882	-0.29562	0	-0.240422	-0.532639	-0.326351	-0.454678	-0.525836	-0.456452
YMR215W	YMR215W PAC cluster GAS3 biological process unknown "1,3-beta-glucanosyltransferase acti"cell wall (sensu Fungi) | YMR216C	-0.348709	-0.34847	-0.0701884	-0.434073	-0.419652	-0.75364	0	-0.484898	-0.545202	-0.601522	-0.6285	-0.550338	-0.822526	0	0.153899	-0.349219	-0.249231	-0.233754	-0.428441	-0.461715
YNR055C	YNR055C ... HOL1 transport transporter activity mitochondrion* | YNR056C	-0.0894651	-0.0943646	-0.186361	-0.0891345	-0.573769	-0.244769	0	-0.510558	-0.795988	-0.325989	-0.538265	-0.862695	-0.785643	0	-0.0337494	0.0608154	-0.234594	-0.36776	-0.605129	-0.513836
YBR031W	YBR031W RP cluster RPL4A protein biosynthesis structural constituent of ribosome cytosolic large ribosomal subunit ( | YBR032W	-0.0256271	-0.303261	0.053701	-0.207554	-0.247038	-0.335415	0	-0.0723024	-0.424839	-0.251602	-0.294751	-0.412972	-0.425554	0	0.139705	-0.381605	-0.0360027	-0.25156	-0.606353	-0.419865
YEL033W	YEL033W … MTC7 | Predicted metabolic role based on network analysis derived from ChIP experiments, a large-scale deletion study and localization of transcription factor binding sites; null mutant is sensitive to temperature oscillation in a cdc13-1 mutantYEL034W	-0.348571	-0.459546	-0.276093	-0.575316	-0.504913	-0.718842	0	-0.350015	-0.0700043	-0.562856	-0.32602	-0.429179	-0.513407	0	-0.332259	-0.725466	-0.140364	-0.366393	-0.729917	-0.568276
